# Supplementary material for: Robust fossil evidence for Proboscidean frugivory and its lasting impact on South American ecosystems
Source: Research Square preprint supplement (doi:10.21203/rs.3.rs-4009197/v1), 2024-03-25
Supplement: Supplementary file 1 [file fb541cfcbc134ab3b37f4c76.xlsx]

## Sheet: bioapatite raw data
e* diet-bioapatite by Tejada-Lara et al. (2018)
Species	BM (a)	ln	e*	e* (rounded)					piC4 = C4 diet proportion
N. platensis	6300	8.7483	14.8417	15					piC3 = C3 diet proportion
a) Body mass by Dantas et al. (2020)									BA = standardized isotopic niche breadth
	Plant δ13C (PDB) mean	e*diet-bioap.	δ13C (PDB) bioapatite
C3 plant	-27	15	-12
C4 plant	-13	15	2
	North-Central Chile
	South-Central Chile
					* Negative piC4 values were rounded to 0
SI1. Sample signature, fossil site, latitude, tooth, bioapatite δ13C (δ13Cbio), bioapatite δ18O of carbonate fraction (δ18OCO3), bioapatite δ18O of phosphate fraction (δ18OPO4), meteoric water δ18O (δ18Omw).
Code	Locality	Latitude	Tooth	δ13C(PDB) bioapatite	piC4*	piC4	piC3	BA	δ18O CO3 (PDB)	δ18Omw (‰ VSMOW)	Reference
SGO. PV.40	Limahuida	31°	M3	-11.3	0.05	0.05	0.95	0.104972	-3.50	-5.37	González-Guarda et al., (2018)
SGO.PV.40	Illapel	31°	M2	-11.54	0.0328571	0.0328571	0.967143	0.0678685	-3.56	-5.44	González-Guarda et al., (2018)
SGO.PV.267	Quereo	31°	m3	-10.8	0.0857143	0.0857143	0.914286	0.185866	-5.03	-7.02	González-Guarda et al., (2018)
SGO.PV.262	Quereo	31°	M3	-10.65	0.0964286	0.0964286	0.903571	0.211035	-4.31	-5.24	Domingo et al., (2012)
SGO.PV.PAINE	Paine	33°	indet.	-10.44	0.111429	0.11	0.89	0.243472	-5.96	-8.05	This study
SGO.PV.12	La Ligua	33°	M3	-5.66639	0.452401	0.452401	0.547599	0.982037	0.491853	-1.07	This study
SGO.PV.8	Tierras Blancas	33°	M2	-14.8	-0.2	0	1	0	-6.91	-5.28	Domingo et al., (2012)
SGO.PV.45	Chacabuco	33°	indet.	-10.9372	0.0759141	0.0759141	0.924086	0.1632	-5.36624	-7.3	This study
SGO.PV.45(1)	Chacabuco	33°	indet.	-11.4014	0.0427585	0.0427585	0.957241	0.0891591	-6.77441	-8.8	This study
SGO.PV.28	Meliipilla	33°	indet.	-10.7156	0.0917412	0.0917412	0.908259	0.199975	-7.38127	-9.5	This study
RMPL05	El Noviciado	33°	M3	-10.8424	0.0826841	0.0826841	0.917316	0.178821	-6.61711	-8.7	This study
SGO.PV.234	Las Condes	33°	indet.	-12.4401	-0.0314383	0	1	0	-7.24062	-9.3	This study
SGO.PV.235b	Catapilco	33°	M3/m3	-12.2789	-0.0199235	0	1	0	-0.980828	-2.65	This study
SGO.PV.235	Catapilco	33°	M3	-12.1	-0.00714286	0	1	0	-2.80	-4.62	This study
RMPL055	Batuco	33°	M3/m3	-10.99	0.0721429	0.0721429	0.927857	0.15457	-5.82	-6.5	This study
El Trebal III	La Rinconada	33°	M3	-11.35	0.0464286	0.0464286	0.953571	0.097148	-7.50	-8.89	Domingo et al., (2012)
El Trebal I	La Rinconada	33°	M3	-10.28	0.122857	0.122857	0.877143	0.27474	-10.41	-11.76	Domingo et al., (2012)
Museo Fonck	Quilpué	33°	M3 2l	-10.47	0.109286	0.109286	0.890714	0.24175	-1.17	-2.87	González-Guarda et al., (2018)
Museo Fonck	Quilpué	33°	M2 1l	-9.1	0.207143	0.207143	0.792857	0.489135	-1.09	-2.78	González-Guarda et al., (2018)
MUSA1690	Río Rapel	33°	M3	-13.37	-0.0978571	0	1	0	-1.18	-2.88	González-Guarda et al., (2018)
MuseoCB	Casablanca	33°	M3/m3	-12.6122	-0.0437261	0	1	0	-3.23655	-5.08	This study
MuseoCB	Casablanca	33°	M3/m3	-12.8361	-0.0597245	0	1	0	-3.02953	-4.86	This study
Museo Historia Natural de Valparaíso	Casablanca	33°	M3	-9.07	0.209286	0.209286	0.790714	0.494702	0.62	-1	González-Guarda et al., (2018)
MUSA1637	Navidad (Pupuya)	33°	M3/m3	-10.4	0.114286	0.114286	0.885714	0.253838	-2.84	-4.65	González-Guarda et al., (2018)
MUSA0354a	Algarrobo	33°	M2/m2	-11.8	0.0142857	0.0142857	0.985714	0.0289794	-2.42	-4.21	González-Guarda et al., (2018)
SGOPV-25164	Tagua Tagua	34°	indet.	-14.3787	-0.169904	0	1	0	-5.08831	-7.07	This study
SGO.PV.49	Tagua Tagua	34°	M3/m3	-7.91912	0.291492	0.291492	0.708508	0.703718	-0.344479	-1.97	This study
SGO.PV.47E	Tagua Tagua	34°	M3/m3	-11.6052	0.0281987	0.0281987	0.971801	0.057985	-3.596	-5.47	This study
SGO.PV.13C(1)	Tagua Tagua	34°	M3/m3	-13.7927	-0.128053	0	1	0	-3.11543	-4.95	This study
SGO.PV.13C	Tagua Tagua	34°	M3/m3	-12.5916	-0.0422573	0	1	0	-5.00023	-6.97	This study
SGO.PV.1C	Tagua Tagua	34°	M3/m3	-11.2364	0.0545394	0.0545394	0.945461	0.114988	-0.375874	-2.01	This study
SGO.PV.25212	Tagua Tagua	34°	indet.	-15.0233	-0.215952	0	1	0	-3.07371	-5	This study
Tagua-25217	Tagua Tagua	34°	indet.	-9.50776	0.178017	0.178017	0.821983	0.413735	1.97014	0.5	This study
TT1	Tagua Tagua	34°	M3/m3	-13.5259	-0.108995	0	1	0	-2.44264	-4.22	This study
SGO.PV.47h	Tagua Tagua	34°	M2/m2	-10.6502	0.0964128	0.0964128	0.903587	0.210998	-7.87546	-10.07	González-Guarda et al., (2018)
SGO.PV.47G	Tagua Tagua	34°	M3/m3	-6.9735	0.359035	0.359035	0.640965	0.852737	0.676334	-0.87	González-Guarda et al., (2018)
SGO.PV.47b	Tagua Tagua	34°	M3/m3	-12.7441	-0.0531503	0	1	0	-3.79819	-5.68	González-Guarda et al., (2018)
SGO PV 47i	Tagua Tagua	34°	M3/m3	-11.5781	0.0301332	0.0301332	0.969867	0.0620789	-3.50904	-5.37	González-Guarda et al., (2018)
SGO.PV.47a(1)	Tagua Tagua	34°	M3	-11.6	0.0285714	0.0285714	0.971429	0.0587727	-3.90	-5.80	González-Guarda et al., (2018)
SGO.PV.47a	Tagua Tagua	34°	M3/m3	-12.47	-0.0335714	0	1	0	-5.13	-7.12	González-Guarda et al., (2018)
SGO.PV.47j	Tagua Tagua	34°	M3	-12.8	-0.0571429	0	1	0	-4.00	-5.91	González-Guarda et al., (2018)
SGO.PV.13a(1)	Tagua Tagua	34°	M3	-13.3	-0.0928571	0	1	0	-6.06	-3.46	González-Guarda et al., (2018)
SGO.PV.13a	Tagua Tagua	34°	M3	-12.41	-0.0292857	0	1	0	-2.76	-4.57	González-Guarda et al., (2018)
SGO.PV.47c	Tagua Tagua	34°	M3/m3	-3.99	0.572143	0.572143	0.427857	0.959212	-1.81	-3.40	Domingo et al., (2012)
SGO.PV.47c1	Tagua Tagua	34°	M3/m3	-4.07	0.566429	0.566429	0.433571	0.96531	-2.29	-4.08	González-Guarda et al., (2018)
SGO.PV.46a	Tagua Tagua	34°	m3	-11.68	0.0228571	0.0228571	0.977143	0.046758	-4.96	-6.94	González-Guarda et al., (2018)
SGO.PV.47l	Tagua Tagua	34°	M3/m3	-12.0402	-0.00287485	-0.00287485	1.00287	-0.00573317	-4.84514	-6.81	This study
SGO.PV.47f	Tagua Tagua	34°	M3/m3	-11.79	0.015	0.015	0.985	0.0304498	-4.39	-6.32	González-Guarda et al., (2018)
SGO.PV.668	Tagua Tagua	34°	Dp2?	-14.25	-0.160714	0	1	0	-8.48	-10.73	González-Guarda et al., (2018)
SGO.PV.686	Tagua Tagua	34°	Dp2?	-13.43	-0.102143	0	1	0	-6.37	-8.56	González-Guarda et al., (2018)
SGO.PV.60	Tagua Tagua	34°	Dp2?	-11.54	0.0328571	0.0328571	0.967143	0.0678685	-5.07	-7.06	González-Guarda et al., (2018)
SGO.PV.47k	Tagua Tagua	34°	M2/m2	-11.97	0.00214286	0.00214286	0.997857	0.0042949	-5.1	-6.58	González-Guarda et al., (2018)
SGO.PV.TT2A	Tagua Tagua	34°	M2/m2	-11.71	0.0207143	0.0207143	0.979286	0.042286	-3.45	-5.26	González-Guarda et al., (2018)
SGO.PV.48a	Tagua Tagua	34°	M1/m1	-12.61	-0.0435714	0	1	0	-6.94	-9.07	González-Guarda et al., (2018)
SGO.PV.TT2B	Tagua Tagua	34°	M3/m3	-7.56	0.317143	0.317143	0.682857	0.764062	-12.44	-14.98	González-Guarda et al., (2018)
SGO.PV.1b	Tagua Tagua	34°	M1/m1	-12.66	-0.0471429	0	1	0	-4.75	-6.78	González-Guarda et al., (2018)
SGO.PV.1d	Tagua Tagua	34°	M2/m2	-11.68	0.0228571	0.0228571	0.977143	0.046758	-3.67	-5.56	González-Guarda et al., (2018)
SGO.PV.256	Tagua Tagua	34°	M3/m3	-11.55	0.0321429	0.0321429	0.967857	0.0663475	-3.43	-5.29	González-Guarda et al., (2018)
SGO.PV.47	Tagua Tagua	34°	M3/m3	-12.7289	-0.0520661	0	1	0	-3.51	-5.38	González-Guarda et al., (2018)
SGO.PV.11	Chillán	36°	M3/m3	-12.94	-0.0671429	0	1	0	-3.32738	-5.18	This study
SGO.PV.55	Parral	36°	M3/m3	-11.12	0.0628571	0.0628571	0.937143	0.133546	-3.54	-5.42	González-Guarda et al., (2018)
SGO.PV.17a	Parral	36°	M3	-12.5	-0.0357143	0	1	0	-4.70	-6.67	González-Guarda et al., (2018)
SGO.PV.15a	Parral	36°	M3/m3	-11.42	0.0414286	0.0414286	0.958571	0.086277	-4.16	-6.08	González-Guarda et al., (2018)
SGO.PV.15b	Parral	36°	M3	-12	0	0	1	0	-3.90	-5.80	González-Guarda et al., (2018)
SGO.PV.17	Parral	36°	M3	-13.58	-0.112857	0	1	0	-3.95	-4.85	González-Guarda et al., (2018)
MRA2462	Alto de Boroa	38°	M3	-12.9	-0.0642857	0	1	0	-5.20	-7.21	González-Guarda et al., (2018)
MRA2461	Alto de Boroa	38°	M3	-13.84	-0.131429	0	1	0	-4.91	-6.89	González-Guarda et al., (2018)
UACh PV MA 1	Máfil	39°	m2	-12.86	-0.0614286	0	1	0	-4.96	-7.24	González-Guarda et al., (2018)
UACh PV MA 1	Máfil	39°	M3	-13.45	-0.103571	0	1	0	-5.39	-7.40	González-Guarda et al., (2018)
UACh PV TR 1	El Trébol	39º	M3	-12.05	-0.00357143	0	1	0	-6.2	-8.26	This study
UACh PV CHA 01	Chan Chan	39°	M3	-11.71	0.0207143	0.0207143	0.979286	0.042286	-3.83	-5.72	González-Guarda et al., (2018)
UACh PV CHO 01	Choroico	40°	M3	-14.41	-0.172143	0	1	0	-5.47	-6.61	González-Guarda et al., (2018)
UACh PV LP 13	La Plata	40°	m2	-15.23	-0.230714	0	1	0	-5.37	-7.03	González-Guarda et al., (2018)
UACh PV LP 14	La Plata	40°	m2	-14.73	-0.195	0	1	0	-5.84	-8.21	González-Guarda et al., (2018)
UACh PV LP 15	La Plata	40°	m2	-14.67	-0.190714	0	1	0	-6.04	-8.55	González-Guarda et al., (2018)
SGO.PV.44	Río Bueno	40°	M3	-12.7	-0.05	0	1	0	-5.18	-6.87	González-Guarda et al., (2018)
SGO.PV.44	Río Bueno	40°	M3	-13.1	-0.0785714	0	1	0	-4.60	-6.56	González-Guarda et al., (2018)
SGO.PV.43	San Pablo	40°	M3	-13.9	-0.135714	0	1	0	-3.90	-5.80	González-Guarda et al., (2018)
MHMOP/LM/13	Caracol	40°	M3	-13.3195	-0.0942512	0	1	0	-5.17899	-7.17	González-Guarda et al., (2018)
MHMOP/MU/3B	Mulpulmo	40°	M2/m2	-12.785	-0.0560684	0	1	0	-4.04376	-5.94	González-Guarda et al., (2018)
MHMOP/MU/5	Mulpulmo	40°	M2/m2	-12.3811	-0.0272182	0	1	0	-4.82567	-6.79	González-Guarda et al., (2018)
MHMOP/NO9	Nochaco	40°	M2/m2	-12.66	-0.0471429	0	1	0	-5.00	-6.97	González-Guarda et al., (2018)
MHMOP/N11	Nochaco	40°	m3	-13.18	-0.0842857	0	1	0	-6.18	-8.26	González-Guarda et al., (2018)
MHMOP/H12	Huilma	40°	M2/m2	-12.11	-0.00785714	0.00357143	1	-1.27549e-05	-5.03	-7.02	González-Guarda et al., (2018)
LN8	Los Notros	40°	M2	-13.8434	-0.131672	0	1	0	-2.89579	-4.72	González-Guarda et al., (2022)
LN8(1)	Los Notros	40°	M2	-13.8779	-0.134138	0	1	0	-4.47658	-6.42	González-Guarda et al., (2022)
MHMOPI/628a	Pilauco	40°	M2	-13.73	-0.123571	0	1	0	-2.43	-4.22	González-Guarda et al., (2018)
MHMOPI/627a	Pilauco	40°	M2	-13.34	-0.0957143	0	1	0	-4.54	-6.5	González-Guarda et al., (2018)
MHMOPI/16	Pilauco	40°	M2	-13.6187	-0.115619	0	1	0	-4.26742	-6.19	González-Guarda et al., (2018)
UACh PV FR 22	Frutillar	41°	m3	-13.33	-0.095	0	1	0	-5.27	-7.06	González-Guarda et al., (2018)
MHAMM A02137	Monte Verde	41°	M3	-13.12	-0.08	0	1	0	-5.20	-7.21	González-Guarda et al., (2018)
MHAMM A02156	Monte Verde	41°	m3	-13.68	-0.12	0	1	0	-5.21	-7.22	González-Guarda et al., (2018)
MHAMM A02177	Monte Verde	41°	M3	-12.02	-0.00142857	0	1	0	-7.17	-9.32	González-Guarda et al., (2018)
MMC 5	Lago Natri	42°	M3	-13.64	-0.117143	0	1	0	-5.69	-7.73	González-Guarda et al., (2018)
MMC 6	Lago Natri	42°	m3	-13.2	-0.0857143	0	1	0	-5.21	-7.22	González-Guarda et al., (2018)
CHI2	Curaco de Vélez	42°	M3/m3	-13.1301	-0.0807213	0	1	0	-4.05537	-5.96	González-Guarda et al., (2022)

## Sheet: raw data dental microwear 
Species	Site	Museum	ID	Molar	Nº scratches	Nº Pits	N º Puncture Pits	Nº Gouges	SWS (0/1/2/3/4)	Hypercoarse (0/1)	Large Pits (0/1)	Cross Scratches (0/1)
Notiomastodon platensis	Lago Natri	MMC	MMC1	M3	15	16	5	0	1	0	0	0
Notiomastodon platensis	Lago Natri	MMC	MMC2	m3	10	33	4	0	1	0	0	1
Notiomastodon platensis	Trebol	UACh PV	TR3	M3	15	27	7	2	2	0	1	0
Notiomastodon platensis	Quereo	SGO.PV	262	M3	9	17	3	3	2	0	1	1
Notiomastodon platensis	Tagua Tagua	SGO.PV	44a	M1/m1	15	20	0	1	2	0	1	0
Notiomastodon platensis	Tagua Tagua	SGO.PV	3a	M3/m3	10	12	4	2	2	1	1	0
Notiomastodon platensis	Tagua Tagua	SGO.PV	241	M3/m3	20	20	3	1	2	0	1	0
Notiomastodon platensis	Los Vilos	SGO.PV	267	M3	TAPHO	TAPHO	TAPHO	TAPHO	TAPHO	TAPHO	TAPHO	TAPHO
Notiomastodon platensis	Parral	SGO.PV	14e	M1	10	13	0	0	2	1	1	0
Notiomastodon platensis	Tagua Tagua	SGO.PV	49	M3/m3	16.5	15.5	5	0	3	1	1	1
Notiomastodon platensis	Catapilco	SGO.PV	235	M3	10.5	22.5	6	2	3	1	1	1
Notiomastodon platensis	Tagua Tagua	SGO.PV	13b	m2	16.5	31.5	6	3	3	1	1	1
Notiomastodon platensis	La Ligua	SGO.PV	12	M3	11	25.5	7	2	3	1	1	1
Notiomastodon platensis	Tagua Tagua	SGO.PV	45a	M3	16	20.5	3	1	2	1	1	1
Notiomastodon platensis	Tagua Tagua	SGO.PV	45r	M3/m3	17	33.5	4	2	2	1	1	1
Notiomastodon platensis	Tagua Tagua	SGO.PV	13d	M3	TAPHO	TAPHO	TAPHO	TAPHO	TAPHO	TAPHO	TAPHO	TAPHO
Notiomastodon platensis	Tagua Tagua	SGO.PV	45n	M3/m3	26.5	29.5	4	1	1	1	1	1
Notiomastodon platensis	Tagua Tagua	SGO.PV	45p	M2/m2	16	26.5	5	2	2	1	1	1
Notiomastodon platensis	Tagua Tagua	SGO.PV	TT1	M3	10	17	4	1	2	1	0	1
Notiomastodon platensis	Tagua Tagua	SGO.PV	45i	M3/m3	10	16	3	1	1	0	1	1
Notiomastodon platensis	Tagua Tagua	SGO.PV	45b	M3/m3	10.5	17	5	0	2	1	1	1
Institutions: SGO.PV, Museo Nacional de Historia Natural
					Raw data from stereoscopic microwear analysis for Notiomastodon platensis from central Chile. SP = small pits; LP = large pits; FS = fine scratches; CS = coarse scratches. A scratch width score (SWS) was obtained by giving a score of 0 to teeth with predominantly fine (F) scratches per tooth surface, 1 to those with a mixture (Mx) of fine and coarse types of textures, 2 to those with predominantl…
UACh PV, Laboratorio de Paleontología, Universidad Austral de Chile
MMC, Museo Municipal de Castro

## Sheet: speciesxmegafauna
	species	LEVEL3_NAM	genus	family	order	Fleshy	Megafauna	L	A	X	labels	labels2	Megafauna2
1	Abarema brachystachya	Brazil South	Abarema	Fabaceae	Fabales	n	0			1	LC	LC	0
2	Abarema idiopoda	Mexico Southeast	Abarema	Fabaceae	Fabales	n	0			16293	LC	LC	0
3	Abarema jupunba	Brazil West-Central	Abarema	Fabaceae	Fabales	n	0			3102	LC	LC	0
4	Abarema langsdorffii	Brazil South	Abarema	Fabaceae	Fabales	n	0			12423	LC	LC	0
5	Abarema piresii	Brazil West-Central	Abarema	Fabaceae	Fabales	n	0			2	LC	LC	0
6	Abarema zolleriana	Mexico Southeast	Abarema	Fabaceae	Fabales	n	0			3	LC	LC	0
8	Abies guatemalensis	Mexico Southeast	Abies	Pinaceae	Pinales	n	0			18498	EN	UR	0
9	Abies hickelii	Mexico Southeast	Abies	Pinaceae	Pinales	n	0			18927	EN	UR	0
10	Abies religiosa	Mexico Southeast	Abies	Pinaceae	Pinales	n	0			18733	LC	LC	0
11	Abuta grandifolia	Brazil West-Central	Abuta	Menispermaceae	Ranunculales	y	0			5100	LC	LC	0
12	Abuta sandwithiana	Brazil West-Central	Abuta	Menispermaceae	Ranunculales	y	0			16401	LC	LC	0
13	Abutilon andrieuxii	Mexico Southeast	Abutilon	Malvaceae	Malvales	n	0			4	LC	LC	0
14	Abutilon giganteum	Mexico Southeast	Abutilon	Malvaceae	Malvales	n	0			5	LC	LC	0
15	Abutilon grandifolium	Brazil South	Abutilon	Malvaceae	Malvales	n	0			6	LC	LC	0
16	Acaciella angustissima	Mexico Southeast	Acaciella	Fabaceae	Fabales	n	0			8831	LC	LC	0
17	Acaciella glauca	Mexico Southeast	Acaciella	Fabaceae	Fabales	n	0			7	LC	LC	0
18	Acaciella smithii	Mexico Southeast	Acaciella	Fabaceae	Fabales	n	0			8	EN	UR	0
19	Acalypha apodanthes	Mexico Southeast	Acalypha	Euphorbiaceae	Malpighiales	n	0			17581	LC	LC	0
20	Acalypha diversifolia	Mexico Southeast	Acalypha	Euphorbiaceae	Malpighiales	n	0			6101	LC	LC	0
21	Acalypha diversifolia	Brazil West-Central	Acalypha	Euphorbiaceae	Malpighiales	n	0			6101	LC	LC	0
22	Acalypha macrostachya	Mexico Southeast	Acalypha	Euphorbiaceae	Malpighiales	n	0			5153	LC	LC	0
23	Acalypha mollis	Mexico Southeast	Acalypha	Euphorbiaceae	Malpighiales	n	0			9	LC	LC	0
24	Acalypha villosa	Brazil South	Acalypha	Euphorbiaceae	Malpighiales	n	0			6053	LC	LC	0
25	Acalypha villosa	Brazil West-Central	Acalypha	Euphorbiaceae	Malpighiales	n	0			6053	LC	LC	0
26	Acalypha villosa	Mexico Southeast	Acalypha	Euphorbiaceae	Malpighiales	n	0			6053	LC	LC	0
27	Acanthocereus tetragonus	Mexico Southeast	Acanthocereus	Cactaceae	Caryophyllales	y	3	7	5	10080	LC	LC	1
28	Acanthocladus albicans	Brazil West-Central	Acanthocladus	Polygalaceae	Fabales	n	0			10	LC	LC	0
29	Acanthocladus brasiliensis	Brazil South	Acanthocladus	Polygalaceae	Fabales	n	0			11	LC	LC	0
30	Acanthocladus brasiliensis	Brazil West-Central	Acanthocladus	Polygalaceae	Fabales	n	0			11	LC	LC	0
31	Acanthosyris falcata	Brazil West-Central	Acanthosyris	Cervantesiaceae	Santalales	y	0			12	LC	LC	0
32	Acanthosyris spinescens	Brazil South	Acanthosyris	Cervantesiaceae	Santalales	y	0			13	LC	LC	0
33	Acca sellowiana	Brazil South	Acca	Myrtaceae	Myrtales	y	1	6	4	11502	LC	LC	1
35	Acer negundo	Mexico Southeast	Acer	Sapindaceae	Sapindales	n	0			19769	LC	LC	0
36	Achatocarpus nigricans	Mexico Southeast	Achatocarpus	Achatocarpaceae	Caryophyllales	y	0			5030	LC	LC	0
37	Achatocarpus oaxacanus	Mexico Southeast	Achatocarpus	Achatocarpaceae	Caryophyllales	y	0			19325	EN	UR	0
38	Achatocarpus praecox	Brazil West-Central	Achatocarpus	Achatocarpaceae	Caryophyllales	y	0			8698	LC	LC	0
39	Achatocarpus praecox	Brazil South	Achatocarpus	Achatocarpaceae	Caryophyllales	y	0			8698	LC	LC	0
40	Acnistus arborescens	Brazil South	Acnistus	Solanaceae	Solanales	y	0			14	LC	LC	0
41	Acnistus arborescens	Mexico Southeast	Acnistus	Solanaceae	Solanales	y	0			14	LC	LC	0
42	Acoelorrhaphe wrightii	Mexico Southeast	Acoelorrhaphe	Arecaceae	Arecales	y	0			15	LC	LC	0
43	Acosmium cardenasii	Brazil West-Central	Acosmium	Fabaceae	Fabales	n	0			15961	LC	LC	0
44	Acrocomia aculeata	Mexico Southeast	Acrocomia	Arecaceae	Arecales	y	1	4	5	16	LC	LC	1
45	Acrocomia aculeata	Brazil West-Central	Acrocomia	Arecaceae	Arecales	y	1	4	5	16	LC	LC	1
46	Acrocomia aculeata	Brazil South	Acrocomia	Arecaceae	Arecales	y	1	4	5	16	LC	LC	1
47	Acrocomia glaucescens	Brazil West-Central	Acrocomia	Arecaceae	Arecales	y	1			17	LC	LC	1
48	Actinostemon amazonicus	Brazil West-Central	Actinostemon	Euphorbiaceae	Malpighiales	n	0			18	LC	LC	0
49	Actinostemon concolor	Brazil South	Actinostemon	Euphorbiaceae	Malpighiales	n	0			14931	LC	LC	0
50	Actinostemon concolor	Brazil West-Central	Actinostemon	Euphorbiaceae	Malpighiales	n	0			14931	LC	LC	0
51	Actinostemon klotzschii	Brazil South	Actinostemon	Euphorbiaceae	Malpighiales	n	0			4657	LC	LC	0
52	Actinostemon schomburgkii	Brazil South	Actinostemon	Euphorbiaceae	Malpighiales	n	0			12502	LC	LC	0
53	Actinostemon schomburgkii	Brazil West-Central	Actinostemon	Euphorbiaceae	Malpighiales	n	0			12502	LC	LC	0
54	Adelia barbinervis	Mexico Southeast	Adelia	Euphorbiaceae	Malpighiales	n	0			16337	LC	LC	0
55	Adelia membranifolia	Brazil West-Central	Adelia	Euphorbiaceae	Malpighiales	n	0			19	LC	LC	0
56	Adelia oaxacana	Mexico Southeast	Adelia	Euphorbiaceae	Malpighiales	n	0			19282	LC	LC	0
57	Adenaria floribunda	Brazil West-Central	Adenaria	Lythraceae	Myrtales	n	0			14941	LC	LC	0
58	Adenaria floribunda	Mexico Southeast	Adenaria	Lythraceae	Myrtales	n	0			14941	LC	LC	0
59	Aegiphila brachiata	Brazil South	Aegiphila	Lamiaceae	Lamiales	y	0			11414	LC	LC	0
60	Aegiphila brachiata	Brazil West-Central	Aegiphila	Lamiaceae	Lamiales	y	0			11414	LC	LC	0
61	Aegiphila bracteolosa	Brazil West-Central	Aegiphila	Lamiaceae	Lamiales	y	0			20	LC	LC	0
62	Aegiphila costaricensis	Mexico Southeast	Aegiphila	Lamiaceae	Lamiales	y	0			15829	LC	LC	0
63	Aegiphila fasciculata	Mexico Southeast	Aegiphila	Lamiaceae	Lamiales	y	0			18773	VU	UR	0
64	Aegiphila graveolens	Brazil South	Aegiphila	Lamiaceae	Lamiales	y	0			21	LC	LC	0
65	Aegiphila integrifolia	Brazil West-Central	Aegiphila	Lamiaceae	Lamiales	y	0			14961	LC	LC	0
66	Aegiphila integrifolia	Brazil South	Aegiphila	Lamiaceae	Lamiales	y	0			14961	LC	LC	0
67	Aegiphila luschnathii	Brazil South	Aegiphila	Lamiaceae	Lamiales	y	0			22	LC	LC	0
68	Aegiphila martinicensis	Mexico Southeast	Aegiphila	Lamiaceae	Lamiales	y	0			23	LC	LC	0
69	Aegiphila mediterranea	Brazil South	Aegiphila	Lamiaceae	Lamiales	y	0			11415	LC	LC	0
70	Aegiphila mediterranea	Brazil West-Central	Aegiphila	Lamiaceae	Lamiales	y	0			11415	LC	LC	0
71	Aegiphila membranacea	Brazil West-Central	Aegiphila	Lamiaceae	Lamiales	y	0			16413	LC	LC	0
72	Aegiphila monstrosa	Mexico Southeast	Aegiphila	Lamiaceae	Lamiales	y	0			16252	VU	UR	0
73	Aegiphila obducta	Brazil South	Aegiphila	Lamiaceae	Lamiales	y	0			12936	LC	LC	0
74	Aegiphila riedeliana	Brazil South	Aegiphila	Lamiaceae	Lamiales	y	0			24	LC	LC	0
75	Aegiphila skutchii	Mexico Southeast	Aegiphila	Lamiaceae	Lamiales	y	0			18734	VU	UR	0
76	Aegiphila valerioi	Mexico Southeast	Aegiphila	Lamiaceae	Lamiales	y	0			17679	LC	LC	0
77	Aegiphila verticillata	Brazil South	Aegiphila	Lamiaceae	Lamiales	y	0			4354	LC	LC	0
78	Aegiphila verticillata	Brazil West-Central	Aegiphila	Lamiaceae	Lamiales	y	0			4354	LC	LC	0
79	Aegiphila vitelliniflora	Brazil West-Central	Aegiphila	Lamiaceae	Lamiales	y	0			13374	LC	LC	0
80	Aegiphila vitelliniflora	Brazil South	Aegiphila	Lamiaceae	Lamiales	y	0			13374	LC	LC	0
81	Aegiphila wigandioides	Mexico Southeast	Aegiphila	Lamiaceae	Lamiales	y	0			19920	EN	UR	0
82	Aextoxicon punctatum	Chile Central	Aextoxicon	Aextoxicaceae	Berberidopsidales	y	0			16215	LC	LC	0
83	Agarista chapadensis	Brazil West-Central	Agarista	Ericaceae	Ericales	n	0			25	LC	LC	0
84	Agarista coriifolia	Brazil West-Central	Agarista	Ericaceae	Ericales	n	0			26	LC	LC	0
85	Agarista duckei	Brazil West-Central	Agarista	Ericaceae	Ericales	n	0			27	LC	LC	0
86	Agarista eucalyptoides	Brazil South	Agarista	Ericaceae	Ericales	n	0			28	LC	LC	0
87	Agarista minensis	Brazil South	Agarista	Ericaceae	Ericales	n	0			29	EN	UR	0
88	Agarista niederleinii	Brazil South	Agarista	Ericaceae	Ericales	n	0			30	LC	LC	0
89	Agarista oleifolia	Brazil West-Central	Agarista	Ericaceae	Ericales	n	0			12473	LC	LC	0
90	Agarista oleifolia	Brazil South	Agarista	Ericaceae	Ericales	n	0			12473	LC	LC	0
91	Ageratina mairetiana	Mexico Southeast	Ageratina	Asteraceae	Asterales	n	0			18532	LC	LC	0
92	Agonandra brasiliensis	Brazil West-Central	Agonandra	Opiliaceae	Santalales	y	0			1963	LC	LC	0
93	Agonandra excelsa	Brazil South	Agonandra	Opiliaceae	Santalales	y	0			4788	LC	LC	0
94	Agonandra excelsa	Brazil West-Central	Agonandra	Opiliaceae	Santalales	y	0			4788	LC	LC	0
95	Agonandra macrocarpa	Mexico Southeast	Agonandra	Opiliaceae	Santalales	y	0			17951	NT	LC	0
96	Agonandra obtusifolia	Mexico Southeast	Agonandra	Opiliaceae	Santalales	y	0			19328	LC	LC	0
97	Agonandra ovatifolia	Mexico Southeast	Agonandra	Opiliaceae	Santalales	y	0			31	EN	UR	0
98	Agonandra racemosa	Mexico Southeast	Agonandra	Opiliaceae	Santalales	y	0			18467	LC	LC	0
99	Agonandra silvatica	Brazil West-Central	Agonandra	Opiliaceae	Santalales	y	0			9100	LC	LC	0
100	Agouticarpa curviflora	Brazil West-Central	Agouticarpa	Rubiaceae	Gentianales	y	0	3	3	5171	LC	LC	0
101	Aiouea acarodomatifera	Brazil South	Aiouea	Lauraceae	Laurales	y	0			13246	LC	LC	0
102	Aiouea amoena	Brazil South	Aiouea	Lauraceae	Laurales	y	0			11416	LC	LC	0
103	Aiouea areolata	Mexico Southeast	Aiouea	Lauraceae	Laurales	y	0			16547	VU	UR	0
104	Aiouea chiapensis	Mexico Southeast	Aiouea	Lauraceae	Laurales	y	0			19921	VU	UR	0
105	Aiouea grandifolia	Brazil West-Central	Aiouea	Lauraceae	Laurales	y	0			3208	LC	LC	0
106	Aiouea grisebachii	Mexico Southeast	Aiouea	Lauraceae	Laurales	y	0			14828	LC	LC	0
107	Aiouea guianensis	Brazil West-Central	Aiouea	Lauraceae	Laurales	y	0			12512	LC	LC	0
108	Aiouea hatschbachii	Brazil South	Aiouea	Lauraceae	Laurales	y	0			32	LC	LC	0
109	Aiouea haussknechtii	Brazil West-Central	Aiouea	Lauraceae	Laurales	y	0			33	LC	LC	0
110	Aiouea impressa	Brazil West-Central	Aiouea	Lauraceae	Laurales	y	0			4064	EN	UR	0
111	Aiouea inconspicua	Mexico Southeast	Aiouea	Lauraceae	Laurales	y	0			34	LC	LC	0
112	Aiouea laevis	Brazil West-Central	Aiouea	Lauraceae	Laurales	y	0			2129	LC	LC	0
113	Aiouea macedoana	Brazil West-Central	Aiouea	Lauraceae	Laurales	y	0			16034	VU	UR	0
114	Aiouea montana	Brazil South	Aiouea	Lauraceae	Laurales	y	0			4678	LC	LC	0
115	Aiouea montana	Brazil West-Central	Aiouea	Lauraceae	Laurales	y	0			4678	LC	LC	0
116	Aiouea montana	Mexico Southeast	Aiouea	Lauraceae	Laurales	y	0			4678	LC	LC	0
117	Aiouea piauhyensis	Brazil West-Central	Aiouea	Lauraceae	Laurales	y	0			35	LC	LC	0
118	Aiouea pseudoglaziovii	Brazil South	Aiouea	Lauraceae	Laurales	y	0			36	LC	LC	0
119	Aiouea saligna	Brazil West-Central	Aiouea	Lauraceae	Laurales	y	0			7503	LC	LC	0
120	Aiouea saligna	Brazil South	Aiouea	Lauraceae	Laurales	y	0			7503	LC	LC	0
121	Aiouea sellowiana	Brazil South	Aiouea	Lauraceae	Laurales	y	0			13423	LC	LC	0
122	Aiouea stenophylla	Brazil South	Aiouea	Lauraceae	Laurales	y	0			37	LC	LC	0
123	Aiouea trinervis	Brazil South	Aiouea	Lauraceae	Laurales	y	0			38	LC	LC	0
124	Aiouea trinervis	Brazil West-Central	Aiouea	Lauraceae	Laurales	y	0			38	LC	LC	0
125	Aiouea zapatae	Mexico Southeast	Aiouea	Lauraceae	Laurales	y	0			18841	VU	UR	0
126	Albizia adinocephala	Mexico Southeast	Albizia	Fabaceae	Fabales	n	0			16394	LC	LC	0
127	Albizia burkartiana	Brazil South	Albizia	Fabaceae	Fabales	n	0			13778	EN	UR	0
128	Albizia edwallii	Brazil South	Albizia	Fabaceae	Fabales	n	0			11417	LC	LC	0
129	Albizia inundata	Brazil West-Central	Albizia	Fabaceae	Fabales	n	0			17202	LC	LC	0
130	Albizia inundata	Brazil South	Albizia	Fabaceae	Fabales	n	0			17202	LC	LC	0
131	Albizia leucocalyx	Mexico Southeast	Albizia	Fabaceae	Fabales	n	0			39	LC	LC	0
132	Albizia niopoides	Mexico Southeast	Albizia	Fabaceae	Fabales	n	0			2131	LC	LC	0
133	Albizia niopoides	Brazil South	Albizia	Fabaceae	Fabales	n	0			2131	LC	LC	0
134	Albizia niopoides	Brazil West-Central	Albizia	Fabaceae	Fabales	n	0			2131	LC	LC	0
135	Albizia polycephala	Brazil South	Albizia	Fabaceae	Fabales	n	0			11353	LC	LC	0
136	Albizia polycephala	Brazil West-Central	Albizia	Fabaceae	Fabales	n	0			11353	LC	LC	0
137	Albizia subdimidiata	Brazil West-Central	Albizia	Fabaceae	Fabales	n	0			19101	LC	LC	0
138	Albizia tomentosa	Mexico Southeast	Albizia	Fabaceae	Fabales	n	0			16253	LC	LC	0
139	Alchornea castaneifolia	Brazil West-Central	Alchornea	Euphorbiaceae	Malpighiales	n	0			17211	LC	LC	0
140	Alchornea chiapasana	Mexico Southeast	Alchornea	Euphorbiaceae	Malpighiales	n	0			19952	EN	UR	0
141	Alchornea discolor	Brazil West-Central	Alchornea	Euphorbiaceae	Malpighiales	n	0			1964	LC	LC	0
142	Alchornea glandulosa	Brazil West-Central	Alchornea	Euphorbiaceae	Malpighiales	n	0			14972	LC	LC	0
143	Alchornea glandulosa	Brazil South	Alchornea	Euphorbiaceae	Malpighiales	n	0			14972	LC	LC	0
144	Alchornea latifolia	Mexico Southeast	Alchornea	Euphorbiaceae	Malpighiales	n	0			3137	LC	LC	0
145	Alchornea sidifolia	Brazil South	Alchornea	Euphorbiaceae	Malpighiales	n	0			40	LC	LC	0
146	Alchornea triplinervia	Brazil South	Alchornea	Euphorbiaceae	Malpighiales	n	0			14982	LC	LC	0
147	Alchornea triplinervia	Mexico Southeast	Alchornea	Euphorbiaceae	Malpighiales	n	0			14982	LC	LC	0
148	Alchornea triplinervia	Brazil West-Central	Alchornea	Euphorbiaceae	Malpighiales	n	0			14982	LC	LC	0
149	Alchorneopsis floribunda	Brazil West-Central	Alchorneopsis	Euphorbiaceae	Malpighiales	n	0			7992	LC	LC	0
150	Alfaroa costaricensis	Mexico Southeast	Alfaroa	Juglandaceae	Fagales	n	0			18038	LC	LC	0
151	Alfaroa mexicana	Mexico Southeast	Alfaroa	Juglandaceae	Fagales	n	0			18735	VU	UR	0
152	Alibertia bertierifolia	Brazil West-Central	Alibertia	Rubiaceae	Gentianales	y	0			12101	LC	LC	0
153	Alibertia edulis	Brazil West-Central	Alibertia	Rubiaceae	Gentianales	y	0			2060	LC	LC	0
154	Alibertia edulis	Brazil South	Alibertia	Rubiaceae	Gentianales	y	0			2060	LC	LC	0
155	Alibertia edulis	Mexico Southeast	Alibertia	Rubiaceae	Gentianales	y	0			2060	LC	LC	0
156	Alibertia latifolia	Brazil West-Central	Alibertia	Rubiaceae	Gentianales	y	0			14100	LC	LC	0
157	Alibertia macrantha	Brazil West-Central	Alibertia	Rubiaceae	Gentianales	y	0			41	LC	LC	0
158	Alibertia pilosa	Brazil West-Central	Alibertia	Rubiaceae	Gentianales	y	0			42	LC	LC	0
159	Allantoma decandra	Brazil West-Central	Allantoma	Lecythidaceae	Ericales	n	0			43	LC	LC	0
160	Allantoma kuhlmannii	Brazil West-Central	Allantoma	Lecythidaceae	Ericales	n	0			44	LC	LC	0
161	Allophylus camptostachys	Mexico Southeast	Allophylus	Sapindaceae	Sapindales	y	0			16338	LC	LC	0
162	Allophylus cominia	Mexico Southeast	Allophylus	Sapindaceae	Sapindales	y	0			14423	LC	LC	0
163	Allophylus divaricatus	Brazil West-Central	Allophylus	Sapindaceae	Sapindales	y	0			9561	LC	LC	0
164	Allophylus edulis	Brazil West-Central	Allophylus	Sapindaceae	Sapindales	y	0			14991	LC	LC	0
165	Allophylus edulis	Brazil South	Allophylus	Sapindaceae	Sapindales	y	0			14991	LC	LC	0
166	Allophylus glabratus	Brazil West-Central	Allophylus	Sapindaceae	Sapindales	y	0			45	LC	LC	0
167	Allophylus guaraniticus	Brazil West-Central	Allophylus	Sapindaceae	Sapindales	y	0			46	LC	LC	0
168	Allophylus guaraniticus	Brazil South	Allophylus	Sapindaceae	Sapindales	y	0			46	LC	LC	0
169	Allophylus pauciflorus	Brazil South	Allophylus	Sapindaceae	Sapindales	y	0			47	LC	LC	0
170	Allophylus pauciflorus	Brazil West-Central	Allophylus	Sapindaceae	Sapindales	y	0			47	LC	LC	0
171	Allophylus peruvianus	Brazil West-Central	Allophylus	Sapindaceae	Sapindales	y	0			48	LC	LC	0
172	Allophylus petiolulatus	Brazil South	Allophylus	Sapindaceae	Sapindales	y	0			49	LC	LC	0
173	Allophylus puberulus	Brazil West-Central	Allophylus	Sapindaceae	Sapindales	y	0			50	LC	LC	0
174	Allophylus puberulus	Brazil South	Allophylus	Sapindaceae	Sapindales	y	0			50	LC	LC	0
175	Allophylus punctatus	Mexico Southeast	Allophylus	Sapindaceae	Sapindales	y	0			12521	LC	LC	0
176	Allophylus punctatus	Brazil West-Central	Allophylus	Sapindaceae	Sapindales	y	0			12521	LC	LC	0
177	Allophylus racemosus	Brazil West-Central	Allophylus	Sapindaceae	Sapindales	y	0			4387	LC	LC	0
178	Allophylus semidentatus	Brazil South	Allophylus	Sapindaceae	Sapindales	y	0			51	LC	LC	0
179	Allophylus semidentatus	Brazil West-Central	Allophylus	Sapindaceae	Sapindales	y	0			51	LC	LC	0
180	Allophylus strictus	Brazil West-Central	Allophylus	Sapindaceae	Sapindales	y	0			8024	LC	LC	0
181	Alnus acuminata	Mexico Southeast	Alnus	Betulaceae	Fagales	n	0			5295	LC	LC	0
182	Alnus jorullensis	Mexico Southeast	Alnus	Betulaceae	Fagales	n	0			18842	LC	LC	0
183	Aloysia virgata	Brazil West-Central	Aloysia	Verbenaceae	Lamiales	y	0			52	LC	LC	0
184	Aloysia virgata	Brazil South	Aloysia	Verbenaceae	Lamiales	y	0			52	LC	LC	0
185	Alseis floribunda	Brazil West-Central	Alseis	Rubiaceae	Gentianales	y	0			7520	LC	LC	0
186	Alseis floribunda	Brazil South	Alseis	Rubiaceae	Gentianales	y	0			7520	LC	LC	0
187	Alseis yucatanensis	Mexico Southeast	Alseis	Rubiaceae	Gentianales	y	0			18681	LC	LC	0
188	Alsophila firma	Mexico Southeast	Alsophila	Cyatheaceae	Cyatheales	n	0			53	LC	LC	0
189	Alsophila setosa	Brazil South	Alsophila	Cyatheaceae	Cyatheales	n	0			54	LC	LC	0
190	Alsophila sternbergii	Brazil South	Alsophila	Cyatheaceae	Cyatheales	n	0			55	LC	LC	0
191	Alsophila sternbergii	Brazil West-Central	Alsophila	Cyatheaceae	Cyatheales	n	0			55	LC	LC	0
192	Alvaradoa amorphoides	Mexico Southeast	Alvaradoa	Picramniaceae	Picramniales	n	0			14402	LC	LC	0
193	Amaioua glomerulata	Brazil West-Central	Amaioua	Rubiaceae	Gentianales	y	0			13401	LC	LC	0
194	Amaioua glomerulata	Mexico Southeast	Amaioua	Rubiaceae	Gentianales	y	0			13401	LC	LC	0
195	Amaioua guianensis	Brazil West-Central	Amaioua	Rubiaceae	Gentianales	y	0			5181	LC	LC	0
196	Amaioua intermedia	Brazil South	Amaioua	Rubiaceae	Gentianales	y	0			7538	LC	LC	0
197	Amaioua intermedia	Brazil West-Central	Amaioua	Rubiaceae	Gentianales	y	0			7538	LC	LC	0
198	Amanoa glaucophylla	Brazil West-Central	Amanoa	Phyllanthaceae	Malpighiales	y	0			56	LC	LC	0
199	Amanoa guianensis	Brazil West-Central	Amanoa	Phyllanthaceae	Malpighiales	y	0			12531	LC	LC	0
200	Amanoa oblongifolia	Brazil West-Central	Amanoa	Phyllanthaceae	Malpighiales	y	0			17252	LC	LC	0
201	Amanoa sinuosa	Brazil West-Central	Amanoa	Phyllanthaceae	Malpighiales	y	0			57	LC	LC	0
202	Ambelania acida	Brazil West-Central	Ambelania	Apocynaceae	Gentianales	y	2	10	5	2671	LC	LC	1
203	Ambelania duckei	Brazil West-Central	Ambelania	Apocynaceae	Gentianales	y	2	4	4	2700	LC	LC	1
204	Amburana acreana	Brazil West-Central	Amburana	Fabaceae	Fabales	n	0			2010	VU	UR	0
205	Amburana cearensis	Brazil West-Central	Amburana	Fabaceae	Fabales	n	0			8701	EN	UR	0
206	Amolinia heydeana	Mexico Southeast	Amolinia	Asteraceae	Asterales	n	0			58	EN	UR	0
207	Amomyrtus luma	Chile Central	Amomyrtus	Myrtaceae	Myrtales	y	0			59	LC	LC	0
208	Amomyrtus meli	Chile Central	Amomyrtus	Myrtaceae	Myrtales	y	0			20548	LC	LC	0
209	Ampelocera edentula	Brazil West-Central	Ampelocera	Ulmaceae	Rosales	n	0			2111	LC	LC	0
210	Ampelocera glabra	Brazil West-Central	Ampelocera	Ulmaceae	Rosales	n	0			12038	LC	LC	0
211	Ampelocera hottlei	Mexico Southeast	Ampelocera	Ulmaceae	Rosales	n	0			16396	LC	LC	0
212	Ampelocera ruizii	Brazil West-Central	Ampelocera	Ulmaceae	Rosales	n	0			9581	LC	LC	0
213	Amphiodon effusus	Brazil West-Central	Amphiodon	Fabaceae	Fabales	n	0			12541	LC	LC	0
214	Amphirrhox longifolia	Brazil South	Amphirrhox	Violaceae	Malpighiales	n	0			9595	LC	LC	0
215	Amphirrhox longifolia	Brazil West-Central	Amphirrhox	Violaceae	Malpighiales	n	0			9595	LC	LC	0
216	Amphitecna apiculata	Mexico Southeast	Amphitecna	Bignoniaceae	Lamiales	y	2	10	5	60	LC	LC	1
217	Amphitecna breedlovei	Mexico Southeast	Amphitecna	Bignoniaceae	Lamiales	y	2			61	LC	LC	1
218	Amphitecna donnell	Mexico Southeast	Amphitecna	Bignoniaceae	Lamiales	y	2			62	LC	LC	1
219	Amphitecna latifolia	Mexico Southeast	Amphitecna	Bignoniaceae	Lamiales	y	2	7	5	63	LC	LC	1
220	Amphitecna macrophylla	Mexico Southeast	Amphitecna	Bignoniaceae	Lamiales	y	2			64	LC	LC	1
221	Amphitecna montana	Mexico Southeast	Amphitecna	Bignoniaceae	Lamiales	y	2	10	8	65	LC	LC	1
222	Amphitecna sessilifolia	Mexico Southeast	Amphitecna	Bignoniaceae	Lamiales	y	2	8	5	18137	VU	UR	1
223	Amphitecna silvicola	Mexico Southeast	Amphitecna	Bignoniaceae	Lamiales	y	2			66	LC	LC	1
224	Amphitecna steyermarkii	Mexico Southeast	Amphitecna	Bignoniaceae	Lamiales	y	2	25	8	67	VU	UR	1
225	Amphitecna tuxtlensis	Mexico Southeast	Amphitecna	Bignoniaceae	Lamiales	y	2			19456	EN	UR	1
226	Amyris attenuata	Mexico Southeast	Amyris	Rutaceae	Sapindales	y	0			68	EN	UR	0
227	Amyris balsamifera	Mexico Southeast	Amyris	Rutaceae	Sapindales	y	0			14711	LC	LC	0
228	Amyris chiapensis	Mexico Southeast	Amyris	Rutaceae	Sapindales	y	0			19518	CR	UR	0
229	Amyris elemifera	Mexico Southeast	Amyris	Rutaceae	Sapindales	y	0			14292	LC	LC	0
230	Amyris sylvatica	Mexico Southeast	Amyris	Rutaceae	Sapindales	y	0			69	LC	LC	0
231	Amyris vestita	Mexico Southeast	Amyris	Rutaceae	Sapindales	y	0			18682	EN	UR	0
232	Anacardium giganteum	Brazil West-Central	Anacardium	Anacardiaceae	Sapindales	y	1			70	LC	LC	1
233	Anacardium occidentale	Brazil West-Central	Anacardium	Anacardiaceae	Sapindales	y	1			71	LC	LC	1
234	Anacardium spruceanum	Brazil West-Central	Anacardium	Anacardiaceae	Sapindales	y	0			72	LC	LC	0
235	Anadenanthera colubrina	Brazil South	Anadenanthera	Fabaceae	Fabales	n	0			8702	LC	LC	0
236	Anadenanthera colubrina	Brazil West-Central	Anadenanthera	Fabaceae	Fabales	n	0			8702	LC	LC	0
237	Anadenanthera peregrina	Brazil South	Anadenanthera	Fabaceae	Fabales	n	0			2132	LC	LC	0
238	Anadenanthera peregrina	Brazil West-Central	Anadenanthera	Fabaceae	Fabales	n	0			2132	LC	LC	0
239	Anaxagorea brevipes	Brazil West-Central	Anaxagorea	Annonaceae	Magnoliales	n	0			15001	LC	LC	0
240	Anaxagorea dolichocarpa	Brazil West-Central	Anaxagorea	Annonaceae	Magnoliales	n	0			5201	LC	LC	0
241	Anaxagorea manausensis	Brazil West-Central	Anaxagorea	Annonaceae	Magnoliales	n	0			4329	LC	LC	0
242	Anaxagorea phaeocarpa	Brazil West-Central	Anaxagorea	Annonaceae	Magnoliales	n	0			2310	LC	LC	0
243	Andinocleome magnifica	Mexico Southeast	Andinocleome	Cleomaceae	Brassicales	n	0			73	LC	LC	0
244	Andira anthelmia	Brazil South	Andira	Fabaceae	Fabales	y	0			11109	LC	LC	0
245	Andira cordata	Brazil West-Central	Andira	Fabaceae	Fabales	y	0			15944	LC	LC	0
246	Andira cujabensis	Brazil West-Central	Andira	Fabaceae	Fabales	y	0			7544	LC	LC	0
247	Andira fraxinifolia	Brazil West-Central	Andira	Fabaceae	Fabales	y	0	3.5	3.5	7499	LC	LC	0
248	Andira fraxinifolia	Brazil South	Andira	Fabaceae	Fabales	y	0	3.5	3.5	7499	LC	LC	0
249	Andira galeottiana	Mexico Southeast	Andira	Fabaceae	Fabales	y	1	6	5	19149	VU	UR	1
250	Andira inermis	Mexico Southeast	Andira	Fabaceae	Fabales	y	0	3	3	9603	LC	LC	0
251	Andira inermis	Brazil West-Central	Andira	Fabaceae	Fabales	y	0	3	3	9603	LC	LC	0
252	Andira inermis	Brazil South	Andira	Fabaceae	Fabales	y	0	3	3	9603	LC	LC	0
253	Andira ormosioides	Brazil South	Andira	Fabaceae	Fabales	y	0	3	3	12069	LC	LC	0
254	Andira surinamensis	Brazil West-Central	Andira	Fabaceae	Fabales	y	0			2511	LC	LC	0
255	Andira vermifuga	Brazil West-Central	Andira	Fabaceae	Fabales	y	0			4355	LC	LC	0
256	Angostura longiflora	Brazil West-Central	Angostura	Rutaceae	Sapindales	n	0			74	LC	LC	0
257	Aniba canelilla	Brazil West-Central	Aniba	Lauraceae	Laurales	y	0			5211	LC	LC	0
258	Aniba citrifolia	Brazil West-Central	Aniba	Lauraceae	Laurales	y	0			2799	LC	LC	0
259	Aniba cylindriflora	Brazil West-Central	Aniba	Lauraceae	Laurales	y	0			2276	LC	LC	0
260	Aniba desertorum	Brazil West-Central	Aniba	Lauraceae	Laurales	y	0			13369	LC	LC	0
261	Aniba firmula	Brazil South	Aniba	Lauraceae	Laurales	y	0			12307	LC	LC	0
262	Aniba heringeri	Brazil West-Central	Aniba	Lauraceae	Laurales	y	0			75	LC	LC	0
263	Aniba megaphylla	Brazil West-Central	Aniba	Lauraceae	Laurales	y	0			2763	LC	LC	0
264	Aniba panurensis	Brazil West-Central	Aniba	Lauraceae	Laurales	y	0			5231	LC	LC	0
265	Aniba parviflora	Brazil West-Central	Aniba	Lauraceae	Laurales	y	0			2712	LC	LC	0
266	Aniba taubertiana	Brazil West-Central	Aniba	Lauraceae	Laurales	y	0			15012	LC	LC	0
267	Anisocapparis speciosa	Brazil West-Central	Anisocapparis	Capparaceae	Brassicales	y	0			76	LC	LC	0
268	Anisophyllea manausensis	Brazil West-Central	Anisophyllea	Anisophylleaceae	Cucurbitales	y	0			77	LC	LC	0
269	Annona amambayensis	Brazil West-Central	Annona	Annonaceae	Magnoliales	y	2	12	10	78	EN	UR	1
270	Annona amazonica	Brazil West-Central	Annona	Annonaceae	Magnoliales	y	2	5	5	5241	LC	LC	1
271	Annona ambotay	Brazil West-Central	Annona	Annonaceae	Magnoliales	y	0	3	3.5	2814	LC	LC	0
272	Annona aurantiaca	Brazil West-Central	Annona	Annonaceae	Magnoliales	y	2	4	5	16038	LC	LC	1
273	Annona cacans	Brazil South	Annona	Annonaceae	Magnoliales	y	2	12	10	11164	LC	LC	1
274	Annona cacans	Brazil West-Central	Annona	Annonaceae	Magnoliales	y	2	12	10	11164	LC	LC	1
275	Annona cherimola	Mexico Southeast	Annona	Annonaceae	Magnoliales	y	2	10	15	5266	LC	LC	1
276	Annona coriacea	Brazil South	Annona	Annonaceae	Magnoliales	y	2	>10	>10	79	LC	LC	1
277	Annona coriacea	Brazil West-Central	Annona	Annonaceae	Magnoliales	y	2	>10	>10	79	LC	LC	1
278	Annona crassiflora	Brazil South	Annona	Annonaceae	Magnoliales	y	2	14	15	13599	LC	LC	1
279	Annona crassiflora	Brazil West-Central	Annona	Annonaceae	Magnoliales	y	2	14	15	13599	LC	LC	1
280	Annona cuspidata	Brazil West-Central	Annona	Annonaceae	Magnoliales	y	0	4	3	18323	LC	LC	0
281	Annona densicoma	Brazil West-Central	Annona	Annonaceae	Magnoliales	y	2		5.5	2907	LC	LC	1
282	Annona dolabripetala	Brazil South	Annona	Annonaceae	Magnoliales	y	0			11747	LC	LC	0
283	Annona dolabripetala	Brazil West-Central	Annona	Annonaceae	Magnoliales	y	0			11747	LC	LC	0
284	Annona emarginata	Brazil West-Central	Annona	Annonaceae	Magnoliales	y	0			8704	LC	LC	0
285	Annona emarginata	Brazil South	Annona	Annonaceae	Magnoliales	y	0			8704	LC	LC	0
286	Annona exsucca	Brazil West-Central	Annona	Annonaceae	Magnoliales	y	2	4	4	17071	LC	LC	1
287	Annona foetida	Brazil West-Central	Annona	Annonaceae	Magnoliales	y	0			5262	LC	LC	0
288	Annona glabra	Brazil South	Annona	Annonaceae	Magnoliales	y	2	>8	>8	4511	LC	LC	1
289	Annona glabra	Mexico Southeast	Annona	Annonaceae	Magnoliales	y	2	>8	>8	4511	LC	LC	1
290	Annona herzogii	Brazil West-Central	Annona	Annonaceae	Magnoliales	y	0			4789	LC	LC	0
291	Annona hypoglauca	Brazil West-Central	Annona	Annonaceae	Magnoliales	y	2	7	4	17301	LC	LC	1
292	Annona liebmanniana	Mexico Southeast	Annona	Annonaceae	Magnoliales	y	2	>8	>8	16468	LC	LC	1
293	Annona macroprophyllata	Mexico Southeast	Annona	Annonaceae	Magnoliales	y	2	>10	>10	18533	LC	LC	1
294	Annona maritima	Brazil South	Annona	Annonaceae	Magnoliales	y	0			14049	LC	LC	0
295	Annona montana	Brazil South	Annona	Annonaceae	Magnoliales	y	2	11	10	9621	LC	LC	1
296	Annona montana	Brazil West-Central	Annona	Annonaceae	Magnoliales	y	2	11	10	9621	LC	LC	1
297	Annona mucosa	Brazil West-Central	Annona	Annonaceae	Magnoliales	y	2	>10	>10	8051	LC	LC	1
298	Annona mucosa	Mexico Southeast	Annona	Annonaceae	Magnoliales	y	2	>10	>10	8051	LC	LC	1
299	Annona muricata	Mexico Southeast	Annona	Annonaceae	Magnoliales	y	2	16	10	3116	LC	LC	1
300	Annona neoinsignis	Brazil West-Central	Annona	Annonaceae	Magnoliales	y	2	6	6	2277	LC	LC	1
301	Annona neosalicifolia	Brazil South	Annona	Annonaceae	Magnoliales	y	2	4	4	11373	LC	LC	1
302	Annona neosalicifolia	Brazil West-Central	Annona	Annonaceae	Magnoliales	y	2	4	4	11373	LC	LC	1
303	Annona neosericea	Brazil South	Annona	Annonaceae	Magnoliales	y	0			12816	LC	LC	0
304	Annona nutans	Brazil West-Central	Annona	Annonaceae	Magnoliales	y	0			8785	LC	LC	0
305	Annona paludosa	Brazil West-Central	Annona	Annonaceae	Magnoliales	y	0	5	3	2278	LC	LC	0
306	Annona purpurea	Mexico Southeast	Annona	Annonaceae	Magnoliales	y	2	>10	>10	8689	LC	LC	1
307	Annona rensoniana	Mexico Southeast	Annona	Annonaceae	Magnoliales	y	0			9648	LC	LC	0
308	Annona rugulosa	Brazil South	Annona	Annonaceae	Magnoliales	y	2	7	7	8858	LC	LC	1
309	Annona scleroderma	Mexico Southeast	Annona	Annonaceae	Magnoliales	y	2	>8	>8	80	LC	LC	1
310	Annona sericea	Brazil West-Central	Annona	Annonaceae	Magnoliales	y	0			11934	LC	LC	0
311	Annona spinescens	Brazil West-Central	Annona	Annonaceae	Magnoliales	y	2	>7	>7	81	LC	LC	1
312	Annona squamosa	Mexico Southeast	Annona	Annonaceae	Magnoliales	y	2	5	5	9646	LC	LC	1
313	Annona sylvatica	Brazil South	Annona	Annonaceae	Magnoliales	y	0			12386	LC	LC	0
314	Annona sylvatica	Brazil West-Central	Annona	Annonaceae	Magnoliales	y	0			12386	LC	LC	0
315	Anomalocalyx uleanus	Brazil West-Central	Anomalocalyx	Euphorbiaceae	Malpighiales	y	0			5323	LC	LC	0
316	Antonia ovata	Brazil West-Central	Antonia	Loganiaceae	Gentianales	y	0			3969	LC	LC	0
317	Antrocaryon amazonicum	Brazil West-Central	Antrocaryon	Anacardiaceae	Sapindales	y	1			82	LC	LC	1
318	Aparisthmium cordatum	Brazil South	Aparisthmium	Euphorbiaceae	Malpighiales	n	0			3410	LC	LC	0
319	Aparisthmium cordatum	Brazil West-Central	Aparisthmium	Euphorbiaceae	Malpighiales	n	0			3410	LC	LC	0
320	Apeiba macropetala	Brazil West-Central	Apeiba	Malvaceae	Malvales	n	0			83	LC	LC	0
321	Apeiba membranacea	Brazil West-Central	Apeiba	Malvaceae	Malvales	n	0			2133	LC	LC	0
322	Apeiba tibourbou	Brazil West-Central	Apeiba	Malvaceae	Malvales	n	0			3610	LC	LC	0
323	Apeiba tibourbou	Mexico Southeast	Apeiba	Malvaceae	Malvales	n	0			3610	LC	LC	0
324	Aphananthe monoica	Mexico Southeast	Aphananthe	Cannabaceae	Rosales	y	0			18595	LC	LC	0
325	Apoplanesia paniculata	Mexico Southeast	Apoplanesia	Fabaceae	Fabales	n	0			15931	LC	LC	0
326	Aptandra liriosmoides	Brazil West-Central	Aptandra	Aptandraceae	Santalales	y	0			84	LC	LC	0
327	Aptandra tubicina	Brazil West-Central	Aptandra	Aptandraceae	Santalales	y	0			5341	LC	LC	0
328	Apuleia leiocarpa	Brazil South	Apuleia	Fabaceae	Fabales	n	0			1966	LC	LC	0
329	Apuleia leiocarpa	Brazil West-Central	Apuleia	Fabaceae	Fabales	n	0			1966	LC	LC	0
330	Arachnothryx bertieroides	Mexico Southeast	Arachnothryx	Rubiaceae	Gentianales	n	0			17610	LC	LC	0
331	Arachnothryx buddleioides	Mexico Southeast	Arachnothryx	Rubiaceae	Gentianales	n	0			16523	LC	LC	0
332	Arachnothryx gonzaleoides	Mexico Southeast	Arachnothryx	Rubiaceae	Gentianales	n	0			85	LC	LC	0
333	Arachnothryx jurgensenii	Mexico Southeast	Arachnothryx	Rubiaceae	Gentianales	n	0			86	LC	LC	0
334	Arachnothryx laniflora	Mexico Southeast	Arachnothryx	Rubiaceae	Gentianales	n	0			87	LC	LC	0
335	Arachnothryx lineolata	Mexico Southeast	Arachnothryx	Rubiaceae	Gentianales	n	0			88	EN	UR	0
336	Arachnothryx linguiformis	Mexico Southeast	Arachnothryx	Rubiaceae	Gentianales	n	0			18622	LC	LC	0
337	Arachnothryx nitida	Mexico Southeast	Arachnothryx	Rubiaceae	Gentianales	n	0			89	EN	UR	0
338	Arachnothryx ovandensis	Mexico Southeast	Arachnothryx	Rubiaceae	Gentianales	n	0			90	VU	UR	0
339	Arachnothryx purpurea	Mexico Southeast	Arachnothryx	Rubiaceae	Gentianales	n	0			91	EN	UR	0
340	Arachnothryx pyramidalis	Mexico Southeast	Arachnothryx	Rubiaceae	Gentianales	n	0			92	LC	LC	0
341	Arachnothryx septicidalis	Mexico Southeast	Arachnothryx	Rubiaceae	Gentianales	n	0			93	LC	LC	0
342	Arachnothryx sousae	Mexico Southeast	Arachnothryx	Rubiaceae	Gentianales	n	0			19970	CR	UR	0
343	Arachnothryx stachyoidea	Mexico Southeast	Arachnothryx	Rubiaceae	Gentianales	n	0			94	LC	LC	0
344	Arachnothryx tacanensis	Mexico Southeast	Arachnothryx	Rubiaceae	Gentianales	n	0			95	EN	UR	0
345	Arachnothryx villosa	Mexico Southeast	Arachnothryx	Rubiaceae	Gentianales	n	0			18660	LC	LC	0
346	Aralia excelsa	Mexico Southeast	Aralia	Araliaceae	Apiales	y	0			5520	LC	LC	0
347	Aralia humilis	Mexico Southeast	Aralia	Araliaceae	Apiales	y	0			18557	LC	LC	0
348	Aralia warmingiana	Brazil West-Central	Aralia	Araliaceae	Apiales	y	0			11285	LC	LC	0
349	Aralia warmingiana	Brazil South	Aralia	Araliaceae	Apiales	y	0			11285	LC	LC	0
350	Araucaria angustifolia	Brazil South	Araucaria	Araucariaceae	Pinales	n	0			11374	CR	UR	0
351	Araucaria araucana	Chile Central	Araucaria	Araucariaceae	Pinales	n	0			20506	EN	UR	0
353	Arbutus xalapensis	Mexico Southeast	Arbutus	Ericaceae	Ericales	y	0			18433	LC	LC	0
354	Ardisia austin	Mexico Southeast	Ardisia	Primulaceae	Ericales	y	0			96	LC	LC	0
355	Ardisia breedlovei	Mexico Southeast	Ardisia	Primulaceae	Ericales	y	0			97	EN	UR	0
356	Ardisia compressa	Mexico Southeast	Ardisia	Primulaceae	Ericales	y	0			14517	LC	LC	0
357	Ardisia escallonioides	Mexico Southeast	Ardisia	Primulaceae	Ericales	y	0			14334	LC	LC	0
358	Ardisia guyanensis	Brazil South	Ardisia	Primulaceae	Ericales	y	0			98	LC	LC	0
359	Ardisia guyanensis	Brazil West-Central	Ardisia	Primulaceae	Ericales	y	0			98	LC	LC	0
360	Ardisia paschalis	Mexico Southeast	Ardisia	Primulaceae	Ericales	y	0			16470	LC	LC	0
361	Ardisia rarescens	Mexico Southeast	Ardisia	Primulaceae	Ericales	y	0			99	LC	LC	0
362	Ardisia standleyana	Mexico Southeast	Ardisia	Primulaceae	Ericales	y	0			17652	LC	LC	0
363	Ardisia venosissima	Mexico Southeast	Ardisia	Primulaceae	Ericales	y	0			10783	LC	LC	0
364	Aristotelia chilensis	Chile Central	Aristotelia	Elaeocarpaceae	Oxalidales	y	0			100	LC	LC	0
365	Aspidosperma araracanga	Brazil West-Central	Aspidosperma	Apocynaceae	Gentianales	n	0			101	LC	LC	0
366	Aspidosperma australe	Brazil West-Central	Aspidosperma	Apocynaceae	Gentianales	n	0			5055	LC	LC	0
367	Aspidosperma australe	Brazil South	Aspidosperma	Apocynaceae	Gentianales	n	0			5055	LC	LC	0
368	Aspidosperma camporum	Brazil South	Aspidosperma	Apocynaceae	Gentianales	n	0			12070	LC	LC	0
369	Aspidosperma carapanauba	Brazil West-Central	Aspidosperma	Apocynaceae	Gentianales	n	0			12551	LC	LC	0
370	Aspidosperma cuspa	Brazil West-Central	Aspidosperma	Apocynaceae	Gentianales	n	0			5088	LC	LC	0
371	Aspidosperma cylindrocarpon	Brazil South	Aspidosperma	Apocynaceae	Gentianales	n	0			5042	LC	LC	0
372	Aspidosperma cylindrocarpon	Brazil West-Central	Aspidosperma	Apocynaceae	Gentianales	n	0			5042	LC	LC	0
373	Aspidosperma desmanthum	Brazil West-Central	Aspidosperma	Apocynaceae	Gentianales	n	0			5365	LC	LC	0
374	Aspidosperma desmanthum	Mexico Southeast	Aspidosperma	Apocynaceae	Gentianales	n	0			5365	LC	LC	0
375	Aspidosperma discolor	Brazil West-Central	Aspidosperma	Apocynaceae	Gentianales	n	0			2801	LC	LC	0
376	Aspidosperma dispermum	Brazil West-Central	Aspidosperma	Apocynaceae	Gentianales	n	0			13090	LC	LC	0
377	Aspidosperma excelsum	Brazil West-Central	Aspidosperma	Apocynaceae	Gentianales	n	0			9653	LC	LC	0
378	Aspidosperma macrocarpon	Brazil West-Central	Aspidosperma	Apocynaceae	Gentianales	n	0			1967	LC	LC	0
379	Aspidosperma multiflorum	Brazil West-Central	Aspidosperma	Apocynaceae	Gentianales	n	0			5089	LC	LC	0
380	Aspidosperma nobile	Brazil West-Central	Aspidosperma	Apocynaceae	Gentianales	n	0			102	LC	LC	0
381	Aspidosperma olivaceum	Brazil South	Aspidosperma	Apocynaceae	Gentianales	n	0			103	LC	LC	0
382	Aspidosperma parvifolium	Brazil South	Aspidosperma	Apocynaceae	Gentianales	n	0			104	LC	LC	0
383	Aspidosperma polyneuron	Brazil West-Central	Aspidosperma	Apocynaceae	Gentianales	n	0			7566	EN	UR	0
384	Aspidosperma polyneuron	Brazil South	Aspidosperma	Apocynaceae	Gentianales	n	0			7566	EN	UR	0
385	Aspidosperma pyricollum	Brazil South	Aspidosperma	Apocynaceae	Gentianales	n	0			11044	LC	LC	0
386	Aspidosperma pyrifolium	Brazil West-Central	Aspidosperma	Apocynaceae	Gentianales	n	0			13581	LC	LC	0
387	Aspidosperma quebracho	Brazil South	Aspidosperma	Apocynaceae	Gentianales	n	0			105	LC	LC	0
388	Aspidosperma quebracho	Brazil West-Central	Aspidosperma	Apocynaceae	Gentianales	n	0			105	LC	LC	0
389	Aspidosperma ramiflorum	Brazil South	Aspidosperma	Apocynaceae	Gentianales	n	0			4971	LC	LC	0
390	Aspidosperma ramiflorum	Brazil West-Central	Aspidosperma	Apocynaceae	Gentianales	n	0			4971	LC	LC	0
391	Aspidosperma riedelii	Brazil South	Aspidosperma	Apocynaceae	Gentianales	n	0			106	LC	LC	0
392	Aspidosperma riedelii	Brazil West-Central	Aspidosperma	Apocynaceae	Gentianales	n	0			106	LC	LC	0
393	Aspidosperma rigidum	Brazil West-Central	Aspidosperma	Apocynaceae	Gentianales	n	0			11941	LC	LC	0
394	Aspidosperma schultesii	Brazil West-Central	Aspidosperma	Apocynaceae	Gentianales	n	0			2546	LC	LC	0
395	Aspidosperma spruceanum	Brazil West-Central	Aspidosperma	Apocynaceae	Gentianales	n	0			9661	LC	LC	0
396	Aspidosperma spruceanum	Mexico Southeast	Aspidosperma	Apocynaceae	Gentianales	n	0			9661	LC	LC	0
397	Aspidosperma subincanum	Brazil West-Central	Aspidosperma	Apocynaceae	Gentianales	n	0			5090	LC	LC	0
398	Aspidosperma subincanum	Brazil South	Aspidosperma	Apocynaceae	Gentianales	n	0			5090	LC	LC	0
399	Aspidosperma tomentosum	Brazil South	Aspidosperma	Apocynaceae	Gentianales	n	0			5091	LC	LC	0
400	Aspidosperma tomentosum	Brazil West-Central	Aspidosperma	Apocynaceae	Gentianales	n	0			5091	LC	LC	0
401	Aspidosperma ulei	Brazil West-Central	Aspidosperma	Apocynaceae	Gentianales	n	0			107	LC	LC	0
402	Astianthus viminalis	Mexico Southeast	Astianthus	Bignoniaceae	Lamiales	n	0			18407	LC	LC	0
403	Astrocaryum aculeatissimum	Brazil South	Astrocaryum	Arecaceae	Arecales	y	1	4	4	11926	LC	LC	1
404	Astrocaryum aculeatum	Brazil West-Central	Astrocaryum	Arecaceae	Arecales	y	1	3.6	4	3911	LC	LC	1
405	Astrocaryum echinatum	Brazil West-Central	Astrocaryum	Arecaceae	Arecales	y	0			108	LC	LC	0
406	Astrocaryum gynacanthum	Brazil West-Central	Astrocaryum	Arecaceae	Arecales	y	0			109	LC	LC	0
407	Astrocaryum huaimi	Brazil West-Central	Astrocaryum	Arecaceae	Arecales	y	1	3	5	4786	LC	LC	1
408	Astrocaryum jauari	Brazil West-Central	Astrocaryum	Arecaceae	Arecales	y	0			110	LC	LC	0
409	Astrocaryum mexicanum	Mexico Southeast	Astrocaryum	Arecaceae	Arecales	n	0			111	LC	LC	0
410	Astrocaryum murumuru	Brazil West-Central	Astrocaryum	Arecaceae	Arecales	y	1	5.7	3.2	112	LC	LC	1
411	Astrocaryum vulgare	Brazil West-Central	Astrocaryum	Arecaceae	Arecales	y	1	5		113	LC	LC	1
412	Astrocasia tremula	Mexico Southeast	Astrocasia	Phyllanthaceae	Malpighiales	y	0			14262	LC	LC	0
413	Astronium fraxinifolium	Brazil South	Astronium	Anacardiaceae	Sapindales	y	0			114	LC	LC	0
414	Astronium fraxinifolium	Brazil West-Central	Astronium	Anacardiaceae	Sapindales	n	0			114	LC	LC	0
415	Astronium graveolens	Mexico Southeast	Astronium	Anacardiaceae	Sapindales	n	0			115	LC	LC	0
416	Astronium graveolens	Brazil South	Astronium	Anacardiaceae	Sapindales	n	0			115	LC	LC	0
417	Astronium graveolens	Brazil West-Central	Astronium	Anacardiaceae	Sapindales	n	0			115	LC	LC	0
418	Astronium lecointei	Brazil West-Central	Astronium	Anacardiaceae	Sapindales	n	0			116	LC	LC	0
419	Astronium nelson	Brazil West-Central	Astronium	Anacardiaceae	Sapindales	n	0			117	LC	LC	0
420	Ateleia albolutescens	Mexico Southeast	Ateleia	Fabaceae	Fabales	n	0			19119	EN	UR	0
421	Ateleia chicoasensis	Mexico Southeast	Ateleia	Fabaceae	Fabales	n	0			19979	EN	UR	0
422	Ateleia glazioveana	Brazil South	Ateleia	Fabaceae	Fabales	n	0			118	LC	LC	0
423	Ateleia glazioveana	Brazil West-Central	Ateleia	Fabaceae	Fabales	n	0			118	LC	LC	0
424	Ateleia guaraya	Brazil West-Central	Ateleia	Fabaceae	Fabales	n	0			5072	LC	LC	0
425	Ateleia gummifera	Mexico Southeast	Ateleia	Fabaceae	Fabales	n	0			14424	EN	UR	0
426	Ateleia pterocarpa	Mexico Southeast	Ateleia	Fabaceae	Fabales	n	0			16644	LC	LC	0
427	Ateleia tenorioi	Mexico Southeast	Ateleia	Fabaceae	Fabales	n	0			19967	EN	UR	0
428	Ateleia tomentosa	Mexico Southeast	Ateleia	Fabaceae	Fabales	n	0			19001	VU	UR	0
429	Attalea apoda	Brazil West-Central	Attalea	Arecaceae	Arecales	y	1	>5	>5	119	LC	LC	1
430	Attalea brasiliensis	Brazil West-Central	Attalea	Arecaceae	Arecales	y	1			120	LC	LC	1
431	Attalea butyracea	Brazil West-Central	Attalea	Arecaceae	Arecales	y	1			121	LC	LC	1
432	Attalea butyracea	Mexico Southeast	Attalea	Arecaceae	Arecales	y	1			121	LC	LC	1
433	Attalea cohune	Mexico Southeast	Attalea	Arecaceae	Arecales	y	1			122	LC	LC	1
434	Attalea dubia	Brazil South	Attalea	Arecaceae	Arecales	y	0			123	LC	LC	0
435	Attalea huebneri	Brazil West-Central	Attalea	Arecaceae	Arecales	y	1			124	LC	LC	1
436	Attalea maripa	Brazil West-Central	Attalea	Arecaceae	Arecales	y	1			4210	LC	LC	1
437	Attalea phalerata	Brazil West-Central	Attalea	Arecaceae	Arecales	y	1			5391	LC	LC	1
438	Attalea speciosa	Brazil West-Central	Attalea	Arecaceae	Arecales	y	1	9	4.5	11963	LC	LC	1
439	Attilaea abalak	Mexico Southeast	Attilaea	Anacardiaceae	Sapindales	y	0			19904	EN	UR	0
440	Aureliana brasiliana	Brazil South	Aureliana	Solanaceae	Solanales	y	0			125	LC	LC	0
441	Aureliana velutina	Brazil West-Central	Aureliana	Solanaceae	Solanales	y	0			126	LC	LC	0
442	Aureliana wettsteiniana	Brazil South	Aureliana	Solanaceae	Solanales	y	0			127	LC	LC	0
443	Austrocedrus chilensis	Chile Central	Austrocedrus	Cupressaceae	Pinales	n	0			20529	NT	LC	0
444	Austrocritonia velutina	Brazil West-Central	Austrocritonia	Asteraceae	Asterales	n	0			128	LC	LC	0
445	Austrocritonia velutina	Brazil South	Austrocritonia	Asteraceae	Asterales	n	0			128	LC	LC	0
446	Austroeupatorium inulaefolium	Brazil South	Austroeupatorium	Asteraceae	Asterales	n	0			129	LC	LC	0
447	Austroeupatorium inulaefolium	Brazil West-Central	Austroeupatorium	Asteraceae	Asterales	n	0			129	LC	LC	0
448	Averrhoidium paraguaiense	Brazil West-Central	Averrhoidium	Sapindaceae	Sapindales	y	0			130	LC	LC	0
449	Avicennia germinans	Mexico Southeast	Avicennia	Acanthaceae	Lamiales	y	0			4513	LC	LC	0
450	Avicennia schaueriana	Brazil South	Avicennia	Acanthaceae	Lamiales	y	0			4514	LC	LC	0
451	Azara celastrinea	Chile Central	Azara	Salicaceae	Malpighiales	y	0			131	LC	LC	0
452	Azara dentata	Chile Central	Azara	Salicaceae	Malpighiales	y	0			132	LC	LC	0
453	Azara integrifolia	Chile Central	Azara	Salicaceae	Malpighiales	y	0			16242	LC	LC	0
454	Azara lanceolata	Chile Central	Azara	Salicaceae	Malpighiales	y	0			20507	LC	LC	0
455	Azara microphylla	Chile Central	Azara	Salicaceae	Malpighiales	y	0			133	LC	LC	0
456	Azara petiolaris	Chile Central	Azara	Salicaceae	Malpighiales	y	0			16229	LC	LC	0
457	Azara serrata	Chile Central	Azara	Salicaceae	Malpighiales	y	0			16230	LC	LC	0
458	Azara uruguayensis	Brazil South	Azara	Salicaceae	Malpighiales	y	0			134	LC	LC	0
459	Baccharis calvescens	Brazil South	Baccharis	Asteraceae	Asterales	n	0			135	LC	LC	0
460	Baccharis caprariifolia	Brazil South	Baccharis	Asteraceae	Asterales	n	0			136	LC	LC	0
461	Baccharis dentata	Brazil West-Central	Baccharis	Asteraceae	Asterales	n	0			137	LC	LC	0
462	Baccharis dentata	Brazil South	Baccharis	Asteraceae	Asterales	n	0			137	LC	LC	0
463	Baccharis dracunculifolia	Brazil West-Central	Baccharis	Asteraceae	Asterales	n	0			138	LC	LC	0
464	Baccharis dracunculifolia	Brazil South	Baccharis	Asteraceae	Asterales	n	0			138	LC	LC	0
465	Baccharis glaziovii	Brazil South	Baccharis	Asteraceae	Asterales	n	0			139	LC	LC	0
466	Baccharis glaziovii	Brazil West-Central	Baccharis	Asteraceae	Asterales	n	0			139	LC	LC	0
467	Baccharis grandimucronata	Brazil South	Baccharis	Asteraceae	Asterales	n	0			140	LC	LC	0
468	Baccharis intermixta	Brazil South	Baccharis	Asteraceae	Asterales	n	0			141	LC	LC	0
469	Baccharis leucocephala	Brazil South	Baccharis	Asteraceae	Asterales	n	0			142	LC	LC	0
470	Baccharis longiattenuata	Brazil South	Baccharis	Asteraceae	Asterales	n	0			143	LC	LC	0
471	Baccharis microdonta	Brazil South	Baccharis	Asteraceae	Asterales	n	0			144	LC	LC	0
472	Baccharis montana	Brazil South	Baccharis	Asteraceae	Asterales	n	0			145	LC	LC	0
473	Baccharis oblongifolia	Brazil South	Baccharis	Asteraceae	Asterales	n	0			146	LC	LC	0
474	Baccharis oblongifolia	Brazil West-Central	Baccharis	Asteraceae	Asterales	n	0			146	LC	LC	0
475	Baccharis oreophila	Brazil South	Baccharis	Asteraceae	Asterales	n	0			13337	LC	LC	0
476	Baccharis psiadioides	Brazil South	Baccharis	Asteraceae	Asterales	n	0			147	LC	LC	0
477	Baccharis retusa	Brazil South	Baccharis	Asteraceae	Asterales	n	0			148	LC	LC	0
478	Baccharis retusa	Brazil West-Central	Baccharis	Asteraceae	Asterales	n	0			148	LC	LC	0
479	Baccharis salicifolia	Brazil West-Central	Baccharis	Asteraceae	Asterales	n	0			149	LC	LC	0
480	Baccharis salicifolia	Chile Central	Baccharis	Asteraceae	Asterales	n	0			149	LC	LC	0
481	Baccharis salicifolia	Mexico Southeast	Baccharis	Asteraceae	Asterales	n	0			149	LC	LC	0
482	Baccharis semiserrata	Brazil South	Baccharis	Asteraceae	Asterales	n	0			150	LC	LC	0
483	Baccharis serrulata	Brazil South	Baccharis	Asteraceae	Asterales	n	0			151	LC	LC	0
484	Baccharis singularis	Brazil South	Baccharis	Asteraceae	Asterales	n	0			152	LC	LC	0
485	Bactris bidentula	Brazil West-Central	Bactris	Arecaceae	Arecales	y	0			153	LC	LC	0
486	Bactris brongniartii	Brazil West-Central	Bactris	Arecaceae	Arecales	y	0			154	LC	LC	0
487	Bactris gasipaes	Brazil West-Central	Bactris	Arecaceae	Arecales	y	1	5	4	155	LC	LC	1
488	Bactris glaucescens	Brazil West-Central	Bactris	Arecaceae	Arecales	y	0			4999	LC	LC	0
489	Bactris hatschbachii	Brazil South	Bactris	Arecaceae	Arecales	y	0			156	EN	UR	0
490	Bactris major	Brazil West-Central	Bactris	Arecaceae	Arecales	y	0			157	LC	LC	0
491	Bactris major	Mexico Southeast	Bactris	Arecaceae	Arecales	y	0			157	LC	LC	0
492	Bactris maraja	Brazil West-Central	Bactris	Arecaceae	Arecales	y	1	>10	>10	158	LC	LC	1
493	Bactris setosa	Brazil West-Central	Bactris	Arecaceae	Arecales	y	0			159	LC	LC	0
494	Bactris setosa	Brazil South	Bactris	Arecaceae	Arecales	y	0			159	LC	LC	0
495	Bagassa guianensis	Brazil West-Central	Bagassa	Moraceae	Rosales	n	0			2980	LC	LC	0
496	Bakeridesia gaumeri	Mexico Southeast	Bakeridesia	Malvaceae	Malvales	n	0			160	LC	LC	0
497	Bakeridesia gloriosa	Mexico Southeast	Bakeridesia	Malvaceae	Malvales	n	0			18589	VU	UR	0
498	Bakeridesia nelsonii	Mexico Southeast	Bakeridesia	Malvaceae	Malvales	n	0			17687	VU	UR	0
499	Bakeridesia notolophium	Mexico Southeast	Bakeridesia	Malvaceae	Malvales	n	0			18601	EN	UR	0
500	Balfourodendron riedelianum	Brazil South	Balfourodendron	Rutaceae	Sapindales	n	0			11377	EN	UR	0
501	Balfourodendron riedelianum	Brazil West-Central	Balfourodendron	Rutaceae	Sapindales	n	0			11377	EN	UR	0
502	Balizia pedicellaris	Brazil West-Central	Balizia	Fabaceae	Fabales	n	0			161	LC	LC	0
503	Balizia pedicellaris	Brazil South	Balizia	Fabaceae	Fabales	n	0			161	LC	LC	0
504	Balmea stormiae	Mexico Southeast	Balmea	Rubiaceae	Gentianales	n	0			18534	EN	UR	0
505	Banara arguta	Brazil West-Central	Banara	Salicaceae	Malpighiales	n	0			18992	LC	LC	0
506	Banara guianensis	Brazil West-Central	Banara	Salicaceae	Malpighiales	n	0			5472	LC	LC	0
507	Banara nitida	Brazil West-Central	Banara	Salicaceae	Malpighiales	n	0			5481	LC	LC	0
508	Banara parviflora	Brazil South	Banara	Salicaceae	Malpighiales	n	0			11378	LC	LC	0
509	Banara tomentosa	Brazil West-Central	Banara	Salicaceae	Malpighiales	n	0			8873	LC	LC	0
510	Banara tomentosa	Brazil South	Banara	Salicaceae	Malpighiales	n	0			8873	LC	LC	0
511	Banara umbraticola	Brazil South	Banara	Salicaceae	Malpighiales	n	0			162	LC	LC	0
512	Banisteriopsis latifolia	Brazil West-Central	Banisteriopsis	Malpighiaceae	Malpighiales	n	0			15945	LC	LC	0
513	Bartholomaea sessiliflora	Mexico Southeast	Bartholomaea	Salicaceae	Malpighiales	n	0			16509	EN	UR	0
514	Bastardiopsis densiflora	Brazil West-Central	Bastardiopsis	Malvaceae	Malvales	n	0			163	LC	LC	0
515	Bastardiopsis densiflora	Brazil South	Bastardiopsis	Malvaceae	Malvales	n	0			163	LC	LC	0
516	Batesia floribunda	Brazil West-Central	Batesia	Fabaceae	Fabales	n	0			2135	LC	LC	0
517	Bathysa australis	Brazil West-Central	Bathysa	Rubiaceae	Gentianales	y	0			164	LC	LC	0
518	Bathysa australis	Brazil South	Bathysa	Rubiaceae	Gentianales	y	0			164	LC	LC	0
519	Batocarpus amazonicus	Brazil West-Central	Batocarpus	Moraceae	Rosales	y	0	20	1	5491	LC	LC	0
520	Bauhinia acreana	Brazil West-Central	Bauhinia	Fabaceae	Fabales	n	0			165	LC	LC	0
521	Bauhinia aculeata	Mexico Southeast	Bauhinia	Fabaceae	Fabales	n	0			5093	LC	LC	0
522	Bauhinia acuruana	Brazil West-Central	Bauhinia	Fabaceae	Fabales	n	0			166	LC	LC	0
523	Bauhinia bauhinioides	Brazil West-Central	Bauhinia	Fabaceae	Fabales	n	0			14142	LC	LC	0
524	Bauhinia bicolor	Brazil West-Central	Bauhinia	Fabaceae	Fabales	n	0			167	LC	LC	0
525	Bauhinia bombaciflora	Brazil West-Central	Bauhinia	Fabaceae	Fabales	n	0			7505	LC	LC	0
526	Bauhinia brachycalyx	Brazil West-Central	Bauhinia	Fabaceae	Fabales	n	0			13433	LC	LC	0
527	Bauhinia catingae	Brazil West-Central	Bauhinia	Fabaceae	Fabales	n	0			14162	LC	LC	0
528	Bauhinia cheilantha	Brazil West-Central	Bauhinia	Fabaceae	Fabales	n	0			12719	LC	LC	0
529	Bauhinia cookii	Mexico Southeast	Bauhinia	Fabaceae	Fabales	n	0			168	LC	LC	0
530	Bauhinia corniculata	Brazil West-Central	Bauhinia	Fabaceae	Fabales	n	0			169	LC	LC	0
531	Bauhinia cupulata	Brazil West-Central	Bauhinia	Fabaceae	Fabales	n	0			5094	LC	LC	0
532	Bauhinia dipetala	Mexico Southeast	Bauhinia	Fabaceae	Fabales	n	0			170	LC	LC	0
533	Bauhinia divaricata	Mexico Southeast	Bauhinia	Fabaceae	Fabales	n	0			14706	LC	LC	0
534	Bauhinia erythrocalyx	Mexico Southeast	Bauhinia	Fabaceae	Fabales	n	0			171	LC	LC	0
535	Bauhinia forficata	Brazil West-Central	Bauhinia	Fabaceae	Fabales	n	0			4950	LC	LC	0
536	Bauhinia forficata	Brazil South	Bauhinia	Fabaceae	Fabales	n	0			4950	LC	LC	0
537	Bauhinia leptantha	Brazil West-Central	Bauhinia	Fabaceae	Fabales	n	0			172	EN	UR	0
538	Bauhinia longicuspis	Brazil West-Central	Bauhinia	Fabaceae	Fabales	n	0			4610	LC	LC	0
539	Bauhinia longifolia	Brazil West-Central	Bauhinia	Fabaceae	Fabales	n	0			7940	LC	LC	0
540	Bauhinia longifolia	Brazil South	Bauhinia	Fabaceae	Fabales	n	0			7940	LC	LC	0
541	Bauhinia longipedicellata	Brazil West-Central	Bauhinia	Fabaceae	Fabales	n	0			7559	LC	LC	0
542	Bauhinia membranacea	Brazil West-Central	Bauhinia	Fabaceae	Fabales	n	0			12389	LC	LC	0
543	Bauhinia mollis	Brazil West-Central	Bauhinia	Fabaceae	Fabales	n	0			173	LC	LC	0
544	Bauhinia pansamalana	Mexico Southeast	Bauhinia	Fabaceae	Fabales	n	0			174	EN	UR	0
545	Bauhinia pauletia	Mexico Southeast	Bauhinia	Fabaceae	Fabales	n	0			14611	LC	LC	0
546	Bauhinia pentandra	Brazil West-Central	Bauhinia	Fabaceae	Fabales	n	0			7455	LC	LC	0
547	Bauhinia platypetala	Brazil West-Central	Bauhinia	Fabaceae	Fabales	n	0			175	LC	LC	0
548	Bauhinia pulchella	Brazil West-Central	Bauhinia	Fabaceae	Fabales	n	0			5095	LC	LC	0
549	Bauhinia rubeleruziana	Mexico Southeast	Bauhinia	Fabaceae	Fabales	n	0			176	LC	LC	0
550	Bauhinia rufa	Brazil South	Bauhinia	Fabaceae	Fabales	n	0			5096	LC	LC	0
551	Bauhinia rufa	Brazil West-Central	Bauhinia	Fabaceae	Fabales	n	0			5096	LC	LC	0
552	Bauhinia seleriana	Mexico Southeast	Bauhinia	Fabaceae	Fabales	n	0			18494	LC	LC	0
553	Bauhinia ungulata	Mexico Southeast	Bauhinia	Fabaceae	Fabales	n	0			3902	LC	LC	0
554	Bauhinia ungulata	Brazil West-Central	Bauhinia	Fabaceae	Fabales	n	0			3902	LC	LC	0
555	Bauhinia ungulata	Brazil South	Bauhinia	Fabaceae	Fabales	n	0			3902	LC	LC	0
556	Bauhinia uruguayensis	Brazil South	Bauhinia	Fabaceae	Fabales	n	0			177	LC	LC	0
557	Bauhinia vespertillo	Brazil West-Central	Bauhinia	Fabaceae	Fabales	n	0			178	LC	LC	0
558	Bauhinia wunderlinii	Mexico Southeast	Bauhinia	Fabaceae	Fabales	n	0			179	LC	LC	0
559	Beaucarnea goldmanii	Mexico Southeast	Beaucarnea	Asparagaceae	Asparagales	n	0			18502	VU	UR	0
560	Beaucarnea pliabilis	Mexico Southeast	Beaucarnea	Asparagaceae	Asparagales	n	0			16356	VU	UR	0
561	Behuria insignis	Brazil South	Behuria	Melastomataceae	Myrtales	y	0			13751	NT	LC	0
562	Beilschmiedia anay	Mexico Southeast	Beilschmiedia	Lauraceae	Laurales	y	1	10	5	18624	EN	UR	1
563	Beilschmiedia berteroana	Chile Central	Beilschmiedia	Lauraceae	Laurales	y	0	2.3	2.3	180	LC	LC	0
564	Beilschmiedia emarginata	Brazil South	Beilschmiedia	Lauraceae	Laurales	y	0			13596	LC	LC	0
565	Beilschmiedia hondurensis	Mexico Southeast	Beilschmiedia	Lauraceae	Laurales	y	0			16256	LC	LC	0
566	Beilschmiedia mexicana	Mexico Southeast	Beilschmiedia	Lauraceae	Laurales	y	0			10989	LC	LC	0
567	Beilschmiedia miersii	Chile Central	Beilschmiedia	Lauraceae	Laurales	y	1	4	3	181	LC	LC	1
568	Beilschmiedia riparia	Mexico Southeast	Beilschmiedia	Lauraceae	Laurales	y	0			182	LC	LC	0
569	Bejaria aestuans	Mexico Southeast	Bejaria	Ericaceae	Ericales	n	0			3840	LC	LC	0
570	Bellucia grossularioides	Mexico Southeast	Bellucia	Melastomataceae	Myrtales	y	0	3	3	8082	LC	LC	0
571	Bellucia grossularioides	Brazil West-Central	Bellucia	Melastomataceae	Myrtales	y	0	3	3	8082	LC	LC	0
572	Bellucia pentamera	Mexico Southeast	Bellucia	Melastomataceae	Myrtales	y	1			4813	LC	LC	1
573	Bellucia pentamera	Brazil West-Central	Bellucia	Melastomataceae	Myrtales	y	0	3	3	4813	LC	LC	0
574	Bellucia strigosa	Brazil West-Central	Bellucia	Melastomataceae	Myrtales	y	0			5522	LC	LC	0
575	Berberis hemsleyi	Mexico Southeast	Berberis	Berberidaceae	Ranunculales	y	0			18216	LC	LC	0
576	Berberis laurina	Brazil South	Berberis	Berberidaceae	Ranunculales	y	0			183	LC	LC	0
577	Berberis microphylla	Chile Central	Berberis	Berberidaceae	Ranunculales	y	0			184	LC	LC	0
578	Berberis volcania	Mexico Southeast	Berberis	Berberidaceae	Ranunculales	y	0			18255	LC	LC	0
579	Bernardia chiapensis	Mexico Southeast	Bernardia	Euphorbiaceae	Malpighiales	n	0			19963	EN	UR	0
580	Bernardia dodecandra	Mexico Southeast	Bernardia	Euphorbiaceae	Malpighiales	n	0			185	LC	LC	0
581	Bernardia mollis	Mexico Southeast	Bernardia	Euphorbiaceae	Malpighiales	n	0			186	EN	UR	0
582	Bernardia nicaraguensis	Mexico Southeast	Bernardia	Euphorbiaceae	Malpighiales	n	0			187	LC	LC	0
583	Bernardia pulchella	Brazil South	Bernardia	Euphorbiaceae	Malpighiales	n	0			188	LC	LC	0
584	Bernardia pulchella	Brazil West-Central	Bernardia	Euphorbiaceae	Malpighiales	n	0			188	LC	LC	0
585	Bernoullia flammea	Mexico Southeast	Bernoullia	Malvaceae	Malvales	n	0			16524	LC	LC	0
586	Berrya cubensis	Mexico Southeast	Berrya	Malvaceae	Malvales	n	0			189	LC	LC	0
587	Bertholletia excelsa	Brazil West-Central	Bertholletia	Lecythidaceae	Ericales	n	0			14203	VU	UR	0
588	Bertiera guianensis	Brazil West-Central	Bertiera	Rubiaceae	Gentianales	y	0			8092	LC	LC	0
589	Billia rosea	Mexico Southeast	Billia	Sapindaceae	Sapindales	y	1			5593	LC	LC	1
590	Bixa arborea	Brazil West-Central	Bixa	Bixaceae	Malvales	n	0			5533	LC	LC	0
591	Bixa excelsa	Brazil West-Central	Bixa	Bixaceae	Malvales	n	0			190	LC	LC	0
592	Bixa orellana	Brazil West-Central	Bixa	Bixaceae	Malvales	n	0			5543	LC	LC	0
593	Bixa orellana	Mexico Southeast	Bixa	Bixaceae	Malvales	n	0			5543	LC	LC	0
594	Blakea laevigata	Mexico Southeast	Blakea	Melastomataceae	Myrtales	y	0			191	LC	LC	0
595	Blakea purpusii	Mexico Southeast	Blakea	Melastomataceae	Myrtales	y	0			192	EN	UR	0
596	Blechnum schomburgkii	Brazil West-Central	Blechnum	Blechnaceae	Athyriales	n	0			193	LC	LC	0
597	Blechnum schomburgkii	Brazil South	Blechnum	Blechnaceae	Athyriales	n	0			193	LC	LC	0
598	Blepharocalyx salicifolius	Brazil West-Central	Blepharocalyx	Myrtaceae	Myrtales	y	0			194	LC	LC	0
599	Blepharocalyx salicifolius	Brazil South	Blepharocalyx	Myrtaceae	Myrtales	y	0			194	LC	LC	0
600	Blomia prisca	Mexico Southeast	Blomia	Sapindaceae	Sapindales	y	0			16295	LC	LC	0
601	Bocageopsis mattogrossensis	Brazil South	Bocageopsis	Annonaceae	Magnoliales	y	0			5073	LC	LC	0
602	Bocageopsis mattogrossensis	Brazil West-Central	Bocageopsis	Annonaceae	Magnoliales	y	0			5073	LC	LC	0
603	Bocageopsis multiflora	Brazil West-Central	Bocageopsis	Annonaceae	Magnoliales	y	0			2405	LC	LC	0
604	Bocconia frutescens	Mexico Southeast	Bocconia	Papaveraceae	Ranunculales	n	0			14404	LC	LC	0
605	Boehmeria caudata	Brazil West-Central	Boehmeria	Urticaceae	Rosales	n	0			4902	LC	LC	0
606	Boehmeria caudata	Brazil South	Boehmeria	Urticaceae	Rosales	n	0			4902	LC	LC	0
607	Boehmeria caudata	Mexico Southeast	Boehmeria	Urticaceae	Rosales	n	0			4902	LC	LC	0
608	Boehmeria pavonii	Mexico Southeast	Boehmeria	Urticaceae	Rosales	n	0			15061	LC	LC	0
609	Boehmeria pavonii	Brazil West-Central	Boehmeria	Urticaceae	Rosales	n	0			15061	LC	LC	0
610	Boehmeria ulmifolia	Mexico Southeast	Boehmeria	Urticaceae	Rosales	n	0			5169	LC	LC	0
611	Bonellia albiflora	Mexico Southeast	Bonellia	Primulaceae	Ericales	y	0			195	LC	LC	0
612	Bonellia flammea	Mexico Southeast	Bonellia	Primulaceae	Ericales	y	0			19900	EN	UR	0
613	Bonellia longifolia	Mexico Southeast	Bonellia	Primulaceae	Ericales	y	0			196	LC	LC	0
614	Bonellia macrocarpa	Mexico Southeast	Bonellia	Primulaceae	Ericales	y	0			16613	LC	LC	0
615	Bonellia nervosa	Mexico Southeast	Bonellia	Primulaceae	Ericales	y	0	3	2	17948	LC	LC	0
616	Bonyunia antoniifolia	Brazil West-Central	Bonyunia	Loganiaceae	Gentianales	y	0			3954	LC	LC	0
617	Bougainvillea campanulata	Brazil West-Central	Bougainvillea	Nyctaginaceae	Caryophyllales	n	0			197	LC	LC	0
618	Bougainvillea glabra	Brazil South	Bougainvillea	Nyctaginaceae	Caryophyllales	n	0			11785	LC	LC	0
619	Bougainvillea glabra	Brazil West-Central	Bougainvillea	Nyctaginaceae	Caryophyllales	n	0			11785	LC	LC	0
620	Bougainvillea malmeana	Brazil West-Central	Bougainvillea	Nyctaginaceae	Caryophyllales	n	0			198	EN	UR	0
621	Bougainvillea praecox	Brazil West-Central	Bougainvillea	Nyctaginaceae	Caryophyllales	n	0			199	LC	LC	0
622	Bourreria andrieuxii	Mexico Southeast	Bourreria	Ehretiaceae	Boraginales	y	0			17955	LC	LC	0
623	Bourreria huanita	Mexico Southeast	Bourreria	Ehretiaceae	Boraginales	y	0			17583	VU	UR	0
624	Bourreria mollis	Mexico Southeast	Bourreria	Ehretiaceae	Boraginales	y	0			200	LC	LC	0
625	Bourreria pulchra	Mexico Southeast	Bourreria	Ehretiaceae	Boraginales	n	0			19082	LC	LC	0
626	Bourreria purpusii	Mexico Southeast	Bourreria	Ehretiaceae	Boraginales	y	0			201	EN	UR	0
627	Bourreria succulenta	Mexico Southeast	Bourreria	Ehretiaceae	Boraginales	y	0			14294	LC	LC	0
628	Bowdichia nitida	Brazil West-Central	Bowdichia	Fabaceae	Fabales	n	0			9711	LC	LC	0
629	Bowdichia virgilioides	Brazil West-Central	Bowdichia	Fabaceae	Fabales	n	0			2062	LC	LC	0
630	Bowdichia virgilioides	Brazil South	Bowdichia	Fabaceae	Fabales	n	0			2062	LC	LC	0
631	Brachistus stramoniifolius	Mexico Southeast	Brachistus	Solanaceae	Solanales	y	0			17584	LC	LC	0
632	Brachynema ramiflorum	Brazil West-Central	Brachynema	Olacaceae	Santalales	y	0			202	LC	LC	0
633	Brahea dulcis	Mexico Southeast	Brahea	Arecaceae	Arecales	y	0			18495	LC	LC	0
634	Brasilettia mollis	Mexico Southeast	Brasilettia	Fabaceae	Fabales	n	0			203	LC	LC	0
635	Brasilettia platyloba	Mexico Southeast	Brasilettia	Fabaceae	Fabales	n	0			204	LC	LC	0
636	Brasilettia violacea	Mexico Southeast	Brasilettia	Fabaceae	Fabales	n	0			205	LC	LC	0
637	Brasiliopuntia brasiliensis	Brazil South	Brasiliopuntia	Cactaceae	Caryophyllales	y	3	4	4	5097	LC	LC	1
638	Brasiliopuntia brasiliensis	Brazil West-Central	Brasiliopuntia	Cactaceae	Caryophyllales	y	3	4	4	5097	LC	LC	1
639	Bravaisia grandiflora	Mexico Southeast	Bravaisia	Acanthaceae	Lamiales	n	0			206	LC	LC	0
640	Bravaisia integerrima	Mexico Southeast	Bravaisia	Acanthaceae	Lamiales	n	0			8249	LC	LC	0
641	Bredemeyera divaricata	Brazil West-Central	Bredemeyera	Polygalaceae	Fabales	n	0			207	LC	LC	0
642	Bredemeyera floribunda	Brazil West-Central	Bredemeyera	Polygalaceae	Fabales	n	0			15081	LC	LC	0
643	Bredemeyera floribunda	Brazil South	Bredemeyera	Polygalaceae	Fabales	n	0			15081	LC	LC	0
644	Bredemeyera lucida	Mexico Southeast	Bredemeyera	Polygalaceae	Fabales	n	0			208	LC	LC	0
645	Bredemeyera lucida	Brazil West-Central	Bredemeyera	Polygalaceae	Fabales	n	0			208	LC	LC	0
646	Brosimum acutifolium	Brazil West-Central	Brosimum	Moraceae	Rosales	y	0			12571	LC	LC	0
647	Brosimum alicastrum	Brazil West-Central	Brosimum	Moraceae	Rosales	y	0			209	LC	LC	0
648	Brosimum alicastrum	Mexico Southeast	Brosimum	Moraceae	Rosales	y	0			209	LC	LC	0
649	Brosimum costaricanum	Mexico Southeast	Brosimum	Moraceae	Rosales	y	0			17746	LC	LC	0
650	Brosimum gaudichaudii	Brazil South	Brosimum	Moraceae	Rosales	y	1	4	4	210	LC	LC	1
651	Brosimum gaudichaudii	Brazil West-Central	Brosimum	Moraceae	Rosales	y	1	4	4	210	LC	LC	1
652	Brosimum glaziovii	Brazil South	Brosimum	Moraceae	Rosales	y	0			12345	EN	UR	0
653	Brosimum guianense	Mexico Southeast	Brosimum	Moraceae	Rosales	y	0			11972	LC	LC	0
654	Brosimum guianense	Brazil South	Brosimum	Moraceae	Rosales	y	0			11972	LC	LC	0
655	Brosimum guianense	Brazil West-Central	Brosimum	Moraceae	Rosales	y	0			11972	LC	LC	0
656	Brosimum lactescens	Brazil West-Central	Brosimum	Moraceae	Rosales	y	0			5010	LC	LC	0
657	Brosimum lactescens	Brazil South	Brosimum	Moraceae	Rosales	y	0			5010	LC	LC	0
658	Brosimum parinarioides	Brazil West-Central	Brosimum	Moraceae	Rosales	y	0			11981	LC	LC	0
659	Brosimum potabile	Brazil West-Central	Brosimum	Moraceae	Rosales	y	0			211	LC	LC	0
660	Brosimum rubescens	Brazil West-Central	Brosimum	Moraceae	Rosales	y	0			212	LC	LC	0
661	Brosimum utile	Brazil West-Central	Brosimum	Moraceae	Rosales	y	0			5562	LC	LC	0
662	Brunellia mexicana	Mexico Southeast	Brunellia	Brunelliaceae	Oxalidales	n	0			16558	LC	LC	0
663	Brunfelsia australis	Brazil West-Central	Brunfelsia	Solanaceae	Solanales	y	0			9718	LC	LC	0
664	Brunfelsia australis	Brazil South	Brunfelsia	Solanaceae	Solanales	y	0			9718	LC	LC	0
665	Brunfelsia pauciflora	Brazil South	Brunfelsia	Solanaceae	Solanales	y	0			13314	LC	LC	0
666	Buchenavia grandis	Brazil West-Central	Buchenavia	Combretaceae	Myrtales	y	0			213	LC	LC	0
667	Buchenavia kleinii	Brazil South	Buchenavia	Combretaceae	Myrtales	y	0	3	2	214	LC	LC	0
668	Buchenavia macrophylla	Brazil West-Central	Buchenavia	Combretaceae	Myrtales	y	0			215	LC	LC	0
669	Buchenavia oxycarpa	Brazil West-Central	Buchenavia	Combretaceae	Myrtales	y	0			216	LC	LC	0
670	Buchenavia reticulata	Brazil West-Central	Buchenavia	Combretaceae	Myrtales	y	0			217	LC	LC	0
671	Buchenavia tetraphylla	Brazil West-Central	Buchenavia	Combretaceae	Myrtales	y	0			218	LC	LC	0
672	Buchenavia tomentosa	Brazil West-Central	Buchenavia	Combretaceae	Myrtales	y	0			219	LC	LC	0
673	Buchenavia viridiflora	Brazil West-Central	Buchenavia	Combretaceae	Myrtales	y	0			220	LC	LC	0
674	Buddleja americana	Mexico Southeast	Buddleja	Scrophulariaceae	Lamiales	n	0			9046	LC	LC	0
675	Buddleja cordata	Mexico Southeast	Buddleja	Scrophulariaceae	Lamiales	n	0			18559	LC	LC	0
676	Buddleja crotonoides	Mexico Southeast	Buddleja	Scrophulariaceae	Lamiales	n	0			221	LC	LC	0
677	Buddleja globosa	Chile Central	Buddleja	Scrophulariaceae	Lamiales	n	0			222	LC	LC	0
678	Buddleja megalocephala	Mexico Southeast	Buddleja	Scrophulariaceae	Lamiales	n	0			18863	EN	UR	0
679	Buddleja nitida	Mexico Southeast	Buddleja	Scrophulariaceae	Lamiales	n	0			18142	LC	LC	0
680	Buddleja parviflora	Mexico Southeast	Buddleja	Scrophulariaceae	Lamiales	n	0			18846	LC	LC	0
681	Buddleja skutchii	Mexico Southeast	Buddleja	Scrophulariaceae	Lamiales	n	0			223	LC	LC	0
682	Buddleja stachyoides	Brazil West-Central	Buddleja	Scrophulariaceae	Lamiales	n	0			224	LC	LC	0
683	Buddleja stachyoides	Brazil South	Buddleja	Scrophulariaceae	Lamiales	n	0			224	LC	LC	0
684	Bulnesia sarmientoi	Brazil West-Central	Bulnesia	Zygophyllaceae	Zygophyllales	n	0			225	LC	LC	0
685	Bunchosia argentea	Brazil West-Central	Bunchosia	Malpighiaceae	Malpighiales	y	0			16441	LC	LC	0
686	Bunchosia biocellata	Mexico Southeast	Bunchosia	Malpighiaceae	Malpighiales	y	0			18436	LC	LC	0
687	Bunchosia breedlovei	Mexico Southeast	Bunchosia	Malpighiaceae	Malpighiales	y	0			226	EN	UR	0
688	Bunchosia canescens	Mexico Southeast	Bunchosia	Malpighiaceae	Malpighiales	y	0			227	EN	UR	0
689	Bunchosia glandulosa	Mexico Southeast	Bunchosia	Malpighiaceae	Malpighiales	y	0			14335	LC	LC	0
690	Bunchosia guatemalensis	Mexico Southeast	Bunchosia	Malpighiaceae	Malpighiales	y	0			18437	LC	LC	0
691	Bunchosia lindeniana	Mexico Southeast	Bunchosia	Malpighiaceae	Malpighiales	y	0			16257	LC	LC	0
692	Bunchosia maritima	Brazil South	Bunchosia	Malpighiaceae	Malpighiales	y	0			228	LC	LC	0
693	Bunchosia pallescens	Brazil South	Bunchosia	Malpighiaceae	Malpighiales	y	0			11421	LC	LC	0
694	Bunchosia paraguariensis	Brazil West-Central	Bunchosia	Malpighiaceae	Malpighiales	y	0			229	LC	LC	0
695	Bunchosia swartziana	Mexico Southeast	Bunchosia	Malpighiaceae	Malpighiales	y	0			14502	LC	LC	0
696	Bursera arborea	Mexico Southeast	Bursera	Burseraceae	Sapindales	y	0			16669	NT	LC	0
697	Bursera ariensis	Mexico Southeast	Bursera	Burseraceae	Sapindales	y	0			19227	LC	LC	0
698	Bursera bipinnata	Mexico Southeast	Bursera	Burseraceae	Sapindales	y	0			18408	LC	LC	0
699	Bursera diversifolia	Mexico Southeast	Bursera	Burseraceae	Sapindales	y	0			230	LC	LC	0
700	Bursera excelsa	Mexico Southeast	Bursera	Burseraceae	Sapindales	y	0			18764	LC	LC	0
701	Bursera grandifolia	Mexico Southeast	Bursera	Burseraceae	Sapindales	y	0			17996	LC	LC	0
702	Bursera graveolens	Mexico Southeast	Bursera	Burseraceae	Sapindales	y	0			10074	LC	LC	0
703	Bursera heteresthes	Mexico Southeast	Bursera	Burseraceae	Sapindales	y	0			18697	EN	UR	0
704	Bursera longipes	Mexico Southeast	Bursera	Burseraceae	Sapindales	y	0			19379	LC	LC	0
705	Bursera ovalifolia	Mexico Southeast	Bursera	Burseraceae	Sapindales	y	0			17957	LC	LC	0
706	Bursera palmeri	Mexico Southeast	Bursera	Burseraceae	Sapindales	y	0			18891	LC	LC	0
707	Bursera penicillata	Mexico Southeast	Bursera	Burseraceae	Sapindales	y	0			19038	LC	LC	0
708	Bursera pereirae	Brazil West-Central	Bursera	Burseraceae	Sapindales	y	0			16041	EN	UR	0
709	Bursera schlechtendalii	Mexico Southeast	Bursera	Burseraceae	Sapindales	y	0			231	LC	LC	0
710	Bursera simaruba	Mexico Southeast	Bursera	Burseraceae	Sapindales	y	0			3903	LC	LC	0
711	Bursera tomentosa	Mexico Southeast	Bursera	Burseraceae	Sapindales	y	0			8185	LC	LC	0
712	Butia capitata	Brazil West-Central	Butia	Arecaceae	Arecales	y	0			232	LC	LC	0
713	Butia catarinensis	Brazil South	Butia	Arecaceae	Arecales	y	0			233	LC	LC	0
714	Butia eriospatha	Brazil South	Butia	Arecaceae	Arecales	y	0			11517	VU	UR	0
715	Butia missionera	Brazil South	Butia	Arecaceae	Arecales	y	0			234	CR	UR	0
716	Butia odorata	Brazil South	Butia	Arecaceae	Arecales	y	0			235	LC	LC	0
717	Butia paraguayensis	Brazil South	Butia	Arecaceae	Arecales	y	0			236	LC	LC	0
718	Butia paraguayensis	Brazil West-Central	Butia	Arecaceae	Arecales	y	0			236	LC	LC	0
719	Butia purpurascens	Brazil West-Central	Butia	Arecaceae	Arecales	y	0			16024	VU	UR	0
720	Butia witeckii	Brazil South	Butia	Arecaceae	Arecales	y	1	4	4	237	EN	UR	1
721	Butia yatay	Brazil South	Butia	Arecaceae	Arecales	y	0			238	LC	LC	0
722	Buxus bartlettii	Mexico Southeast	Buxus	Buxaceae	Buxales	y	0			16670	LC	LC	0
723	Byrsonima aerugo	Brazil West-Central	Byrsonima	Malpighiaceae	Malpighiales	y	0			2406	LC	LC	0
724	Byrsonima affinis	Brazil West-Central	Byrsonima	Malpighiaceae	Malpighiales	y	0			13492	LC	LC	0
725	Byrsonima arthropoda	Brazil West-Central	Byrsonima	Malpighiaceae	Malpighiales	y	0			5411	LC	LC	0
726	Byrsonima bucidifolia	Mexico Southeast	Byrsonima	Malpighiaceae	Malpighiales	y	0			16627	LC	LC	0
727	Byrsonima chrysophylla	Brazil West-Central	Byrsonima	Malpighiaceae	Malpighiales	y	0			239	LC	LC	0
728	Byrsonima clausseniana	Brazil West-Central	Byrsonima	Malpighiaceae	Malpighiales	y	0			12678	LC	LC	0
729	Byrsonima coccolobifolia	Brazil West-Central	Byrsonima	Malpighiaceae	Malpighiales	y	0			4358	LC	LC	0
730	Byrsonima coccolobifolia	Brazil South	Byrsonima	Malpighiaceae	Malpighiales	y	0			4358	LC	LC	0
731	Byrsonima correifolia	Brazil West-Central	Byrsonima	Malpighiaceae	Malpighiales	y	0			12498	LC	LC	0
732	Byrsonima crassifolia	Brazil West-Central	Byrsonima	Malpighiaceae	Malpighiales	y	0			2041	LC	LC	0
733	Byrsonima crassifolia	Mexico Southeast	Byrsonima	Malpighiaceae	Malpighiales	y	0			2041	LC	LC	0
734	Byrsonima crispa	Brazil West-Central	Byrsonima	Malpighiaceae	Malpighiales	y	0			11991	LC	LC	0
735	Byrsonima cydoniifolia	Brazil West-Central	Byrsonima	Malpighiaceae	Malpighiales	y	0			5031	LC	LC	0
736	Byrsonima eugeniifolia	Brazil West-Central	Byrsonima	Malpighiaceae	Malpighiales	y	0			3335	LC	LC	0
737	Byrsonima intermedia	Brazil South	Byrsonima	Malpighiaceae	Malpighiales	y	0			240	LC	LC	0
738	Byrsonima intermedia	Brazil West-Central	Byrsonima	Malpighiaceae	Malpighiales	y	0			240	LC	LC	0
739	Byrsonima krukoffii	Brazil West-Central	Byrsonima	Malpighiaceae	Malpighiales	y	0			241	LC	LC	0
740	Byrsonima lancifolia	Brazil West-Central	Byrsonima	Malpighiaceae	Malpighiales	y	0			12270	LC	LC	0
741	Byrsonima laxiflora	Brazil West-Central	Byrsonima	Malpighiaceae	Malpighiales	y	0			7468	LC	LC	0
742	Byrsonima ligustrifolia	Brazil South	Byrsonima	Malpighiaceae	Malpighiales	y	0			12436	LC	LC	0
743	Byrsonima linguifera	Brazil West-Central	Byrsonima	Malpighiaceae	Malpighiales	y	0			242	LC	LC	0
744	Byrsonima martiana	Brazil West-Central	Byrsonima	Malpighiaceae	Malpighiales	y	0			13394	CR	UR	0
745	Byrsonima melanocarpa	Brazil West-Central	Byrsonima	Malpighiaceae	Malpighiales	y	0			243	LC	LC	0
746	Byrsonima myricifolia	Brazil South	Byrsonima	Malpighiaceae	Malpighiales	y	0			12943	LC	LC	0
747	Byrsonima niedenzuiana	Brazil South	Byrsonima	Malpighiaceae	Malpighiales	y	0			244	LC	LC	0
748	Byrsonima pachyphylla	Brazil West-Central	Byrsonima	Malpighiaceae	Malpighiales	y	0			13455	LC	LC	0
749	Byrsonima piresii	Brazil West-Central	Byrsonima	Malpighiaceae	Malpighiales	y	0			4184	LC	LC	0
750	Byrsonima poeppigiana	Brazil West-Central	Byrsonima	Malpighiaceae	Malpighiales	y	0			16451	LC	LC	0
751	Byrsonima punctulata	Brazil West-Central	Byrsonima	Malpighiaceae	Malpighiales	y	0			3429	LC	LC	0
752	Byrsonima riparia	Brazil West-Central	Byrsonima	Malpighiaceae	Malpighiales	y	0			245	LC	LC	0
753	Byrsonima rotunda	Brazil West-Central	Byrsonima	Malpighiaceae	Malpighiales	y	0			15946	LC	LC	0
754	Byrsonima sericea	Brazil West-Central	Byrsonima	Malpighiaceae	Malpighiales	y	0			6812	LC	LC	0
755	Byrsonima spicata	Brazil West-Central	Byrsonima	Malpighiaceae	Malpighiales	y	0			15111	LC	LC	0
756	Byrsonima stipulacea	Brazil West-Central	Byrsonima	Malpighiaceae	Malpighiales	y	0			5710	LC	LC	0
757	Byrsonima umbellata	Brazil West-Central	Byrsonima	Malpighiaceae	Malpighiales	y	0			7545	LC	LC	0
758	Byrsonima vacciniifolia	Brazil West-Central	Byrsonima	Malpighiaceae	Malpighiales	y	0			12639	LC	LC	0
759	Byrsonima verbascifolia	Brazil West-Central	Byrsonima	Malpighiaceae	Malpighiales	y	0			4359	LC	LC	0
760	Byrsonima verbascifolia	Brazil South	Byrsonima	Malpighiaceae	Malpighiales	y	0			4359	LC	LC	0
761	Cabralea canjerana	Brazil South	Cabralea	Meliaceae	Sapindales	y	0			5596	LC	LC	0
762	Cabralea canjerana	Brazil West-Central	Cabralea	Meliaceae	Sapindales	y	0			5596	LC	LC	0
763	Cabralea polytricha	Brazil West-Central	Cabralea	Meliaceae	Sapindales	y	0			246	LC	LC	0
764	Caesalpinia cacalaco	Mexico Southeast	Caesalpinia	Fabaceae	Fabales	n	0			247	LC	LC	0
765	Caesalpinia exostemma	Mexico Southeast	Caesalpinia	Fabaceae	Fabales	n	0			248	LC	LC	0
766	Caesalpinia gilliesii	Chile Central	Caesalpinia	Fabaceae	Fabales	n	0			249	LC	LC	0
767	Caesalpinia pulcherrima	Mexico Southeast	Caesalpinia	Fabaceae	Fabales	n	0			18690	LC	LC	0
768	Caesalpinia spinosa	Chile Central	Caesalpinia	Fabaceae	Fabales	n	0			250	LC	LC	0
769	Caesalpinia vesicaria	Mexico Southeast	Caesalpinia	Fabaceae	Fabales	n	0			251	LC	LC	0
770	Caesalpinia yucatanensis	Mexico Southeast	Caesalpinia	Fabaceae	Fabales	n	0			252	LC	LC	0
771	Calatola costaricensis	Mexico Southeast	Calatola	Icacinaceae	Icacinales	y	1	5	4	5811	LC	LC	1
772	Calatola laevigata	Mexico Southeast	Calatola	Icacinaceae	Icacinales	y	1	6	5	16510	EN	UR	1
773	Calatola mollis	Mexico Southeast	Calatola	Icacinaceae	Icacinales	y	1	4	4	18991	CR	UR	1
774	Caldcluvia paniculata	Chile Central	Caldcluvia	Cunoniaceae	Oxalidales	n	0			253	LC	LC	0
775	Calliandra belizensis	Mexico Southeast	Calliandra	Fabaceae	Fabales	n	0			254	LC	LC	0
776	Calliandra bijuga	Mexico Southeast	Calliandra	Fabaceae	Fabales	n	0			17766	LC	LC	0
777	Calliandra brevipes	Brazil South	Calliandra	Fabaceae	Fabales	n	0			255	LC	LC	0
778	Calliandra caeciliae	Mexico Southeast	Calliandra	Fabaceae	Fabales	n	0			18486	LC	LC	0
779	Calliandra foliolosa	Brazil West-Central	Calliandra	Fabaceae	Fabales	n	0			256	LC	LC	0
780	Calliandra foliolosa	Brazil South	Calliandra	Fabaceae	Fabales	n	0			256	LC	LC	0
781	Calliandra harrisii	Brazil West-Central	Calliandra	Fabaceae	Fabales	n	0			257	LC	LC	0
782	Calliandra houstoniana	Mexico Southeast	Calliandra	Fabaceae	Fabales	n	0			7042	LC	LC	0
783	Calliandra laxa	Brazil West-Central	Calliandra	Fabaceae	Fabales	n	0			3928	LC	LC	0
784	Calliandra magdalenae	Mexico Southeast	Calliandra	Fabaceae	Fabales	n	0			7861	LC	LC	0
785	Calliandra ricoana	Mexico Southeast	Calliandra	Fabaceae	Fabales	n	0			19911	CR	UR	0
786	Calliandra rubescens	Mexico Southeast	Calliandra	Fabaceae	Fabales	n	0			17983	LC	LC	0
787	Calliandra trinervia	Mexico Southeast	Calliandra	Fabaceae	Fabales	n	0			5910	LC	LC	0
788	Calliandra tweedii	Brazil South	Calliandra	Fabaceae	Fabales	n	0			258	LC	LC	0
789	Callianthe amoena	Brazil South	Callianthe	Malvaceae	Malvales	n	0			259	LC	LC	0
790	Callianthe bedfordiana	Brazil South	Callianthe	Malvaceae	Malvales	n	0			260	LC	LC	0
791	Callianthe fluviatilis	Brazil South	Callianthe	Malvaceae	Malvales	n	0			261	LC	LC	0
792	Callianthe rufinerva	Brazil South	Callianthe	Malvaceae	Malvales	n	0			12750	LC	LC	0
793	Callicarpa acuminata	Mexico Southeast	Callicarpa	Lamiaceae	Lamiales	n	0			4964	LC	LC	0
794	Callisthene castellanosii	Brazil South	Callisthene	Vochysiaceae	Myrtales	n	0			13197	NT	LC	0
795	Callisthene fasciculata	Brazil West-Central	Callisthene	Vochysiaceae	Myrtales	n	0			5098	LC	LC	0
796	Callisthene hassleri	Brazil West-Central	Callisthene	Vochysiaceae	Myrtales	n	0			262	LC	LC	0
797	Callisthene inundata	Brazil South	Callisthene	Vochysiaceae	Myrtales	n	0			263	VU	UR	0
798	Callisthene kuhlmannii	Brazil South	Callisthene	Vochysiaceae	Myrtales	n	0			13671	EN	UR	0
799	Callisthene major	Brazil West-Central	Callisthene	Vochysiaceae	Myrtales	n	0			7579	LC	LC	0
800	Callisthene microphylla	Brazil West-Central	Callisthene	Vochysiaceae	Myrtales	n	0			5099	LC	LC	0
801	Callisthene minor	Brazil West-Central	Callisthene	Vochysiaceae	Myrtales	n	0			12558	LC	LC	0
802	Callisthene mollissima	Brazil West-Central	Callisthene	Vochysiaceae	Myrtales	n	0			16006	NT	LC	0
804	Calophyllum brasiliense	Brazil West-Central	Calophyllum	Calophyllaceae	Malpighiales	y	0			8121	LC	LC	0
805	Calophyllum brasiliense	Mexico Southeast	Calophyllum	Calophyllaceae	Malpighiales	y	0			8121	LC	LC	0
806	Calophyllum brasiliense	Brazil South	Calophyllum	Calophyllaceae	Malpighiales	y	0			8121	LC	LC	0
807	Calophyllum longifolium	Brazil West-Central	Calophyllum	Calophyllaceae	Malpighiales	y	0			4499	LC	LC	0
808	Calycophyllum candidissimum	Mexico Southeast	Calycophyllum	Rubiaceae	Gentianales	n	0			14543	LC	LC	0
809	Calycophyllum megistocaulum	Brazil West-Central	Calycophyllum	Rubiaceae	Gentianales	n	0			6010	LC	LC	0
810	Calycophyllum multiflorum	Brazil West-Central	Calycophyllum	Rubiaceae	Gentianales	n	0			264	LC	LC	0
811	Calycophyllum spruceanum	Brazil West-Central	Calycophyllum	Rubiaceae	Gentianales	n	0			265	LC	LC	0
812	Calyptranthes amoena	Brazil West-Central	Calyptranthes	Myrtaceae	Myrtales	y	0			266	LC	LC	0
813	Calyptranthes brasiliensis	Brazil West-Central	Calyptranthes	Myrtaceae	Myrtales	y	0			267	LC	LC	0
814	Calyptranthes brasiliensis	Brazil South	Calyptranthes	Myrtaceae	Myrtales	y	0			267	LC	LC	0
815	Calyptranthes chiapensis	Mexico Southeast	Calyptranthes	Myrtaceae	Myrtales	y	0			268	LC	LC	0
816	Calyptranthes chytraculia	Mexico Southeast	Calyptranthes	Myrtaceae	Myrtales	y	0			269	LC	LC	0
817	Calyptranthes clusiifolia	Brazil West-Central	Calyptranthes	Myrtaceae	Myrtales	y	0			270	LC	LC	0
818	Calyptranthes concinna	Brazil West-Central	Calyptranthes	Myrtaceae	Myrtales	y	0			271	LC	LC	0
819	Calyptranthes concinna	Brazil South	Calyptranthes	Myrtaceae	Myrtales	y	0			271	LC	LC	0
820	Calyptranthes crebra	Brazil West-Central	Calyptranthes	Myrtaceae	Myrtales	y	0			272	LC	LC	0
821	Calyptranthes cuspidata	Brazil West-Central	Calyptranthes	Myrtaceae	Myrtales	y	0			273	LC	LC	0
822	Calyptranthes densiflora	Brazil West-Central	Calyptranthes	Myrtaceae	Myrtales	y	0			274	LC	LC	0
823	Calyptranthes fasciculata	Brazil West-Central	Calyptranthes	Myrtaceae	Myrtales	y	0			2673	LC	LC	0
824	Calyptranthes grammica	Brazil South	Calyptranthes	Myrtaceae	Myrtales	y	0			275	LC	LC	0
825	Calyptranthes grandifolia	Brazil South	Calyptranthes	Myrtaceae	Myrtales	y	0			11677	LC	LC	0
826	Calyptranthes hatschbachii	Brazil South	Calyptranthes	Myrtaceae	Myrtales	y	0			276	EN	UR	0
827	Calyptranthes hylobates	Mexico Southeast	Calyptranthes	Myrtaceae	Myrtales	y	0			17357	LC	LC	0
828	Calyptranthes karlingii	Mexico Southeast	Calyptranthes	Myrtaceae	Myrtales	y	0			277	LC	LC	0
829	Calyptranthes karwinskyana	Mexico Southeast	Calyptranthes	Myrtaceae	Myrtales	y	0			278	LC	LC	0
830	Calyptranthes lanceolata	Brazil South	Calyptranthes	Myrtaceae	Myrtales	y	0			279	LC	LC	0
831	Calyptranthes lindeniana	Mexico Southeast	Calyptranthes	Myrtaceae	Myrtales	y	0			280	LC	LC	0
832	Calyptranthes lucida	Brazil West-Central	Calyptranthes	Myrtaceae	Myrtales	y	0			281	LC	LC	0
833	Calyptranthes lucida	Brazil South	Calyptranthes	Myrtaceae	Myrtales	y	0			281	LC	LC	0
834	Calyptranthes macrantha	Mexico Southeast	Calyptranthes	Myrtaceae	Myrtales	y	0			282	EN	UR	0
835	Calyptranthes macrophylla	Brazil West-Central	Calyptranthes	Myrtaceae	Myrtales	y	0			283	LC	LC	0
836	Calyptranthes mayana	Mexico Southeast	Calyptranthes	Myrtaceae	Myrtales	y	0			284	EN	UR	0
837	Calyptranthes megistophylla	Mexico Southeast	Calyptranthes	Myrtaceae	Myrtales	y	0			285	LC	LC	0
838	Calyptranthes millspaughii	Mexico Southeast	Calyptranthes	Myrtaceae	Myrtales	y	0			286	LC	LC	0
839	Calyptranthes obovata	Brazil South	Calyptranthes	Myrtaceae	Myrtales	y	0			287	LC	LC	0
840	Calyptranthes ovalifolia	Brazil West-Central	Calyptranthes	Myrtaceae	Myrtales	y	0			288	EN	UR	0
841	Calyptranthes pallens	Mexico Southeast	Calyptranthes	Myrtaceae	Myrtales	y	0			289	LC	LC	0
842	Calyptranthes paniculata	Brazil West-Central	Calyptranthes	Myrtaceae	Myrtales	y	0			290	LC	LC	0
843	Calyptranthes paxillata	Mexico Southeast	Calyptranthes	Myrtaceae	Myrtales	y	0			291	LC	LC	0
844	Calyptranthes perlaevigata	Mexico Southeast	Calyptranthes	Myrtaceae	Myrtales	y	0			292	EN	UR	0
845	Calyptranthes pileata	Brazil South	Calyptranthes	Myrtaceae	Myrtales	y	0			293	LC	LC	0
846	Calyptranthes rubella	Brazil South	Calyptranthes	Myrtaceae	Myrtales	y	0			294	LC	LC	0
847	Calyptranthes salamensis	Mexico Southeast	Calyptranthes	Myrtaceae	Myrtales	y	0			295	LC	LC	0
848	Calyptranthes schiedeana	Mexico Southeast	Calyptranthes	Myrtaceae	Myrtales	y	0			296	LC	LC	0
849	Calyptranthes speciosa	Brazil West-Central	Calyptranthes	Myrtaceae	Myrtales	y	0			297	LC	LC	0
850	Calyptranthes strigipes	Brazil South	Calyptranthes	Myrtaceae	Myrtales	y	0			12782	LC	LC	0
851	Calyptranthes tonii	Mexico Southeast	Calyptranthes	Myrtaceae	Myrtales	y	0			298	EN	UR	0
852	Calyptranthes tricona	Brazil South	Calyptranthes	Myrtaceae	Myrtales	y	0			299	LC	LC	0
853	Calyptranthes widgreniana	Brazil West-Central	Calyptranthes	Myrtaceae	Myrtales	y	0			12947	LC	LC	0
854	Cameraria latifolia	Mexico Southeast	Cameraria	Apocynaceae	Gentianales	n	0			300	LC	LC	0
855	Campomanesia eugenioides	Brazil West-Central	Campomanesia	Myrtaceae	Myrtales	y	0			301	LC	LC	0
856	Campomanesia eugenioides	Brazil South	Campomanesia	Myrtaceae	Myrtales	y	0			301	LC	LC	0
857	Campomanesia guaviroba	Brazil South	Campomanesia	Myrtaceae	Myrtales	y	0			302	LC	LC	0
858	Campomanesia guaviroba	Brazil West-Central	Campomanesia	Myrtaceae	Myrtales	y	0			302	LC	LC	0
859	Campomanesia guazumifolia	Brazil South	Campomanesia	Myrtaceae	Myrtales	y	0			11426	LC	LC	0
860	Campomanesia guazumifolia	Brazil West-Central	Campomanesia	Myrtaceae	Myrtales	y	0			11426	LC	LC	0
861	Campomanesia lineatifolia	Brazil West-Central	Campomanesia	Myrtaceae	Myrtales	y	1	4	4	2137	LC	LC	1
862	Campomanesia neriiflora	Brazil South	Campomanesia	Myrtaceae	Myrtales	y	0			13711	VU	UR	0
863	Campomanesia phaea	Brazil South	Campomanesia	Myrtaceae	Myrtales	y	1	3	4	12948	VU	UR	1
864	Campomanesia schlechtendaliana	Brazil South	Campomanesia	Myrtaceae	Myrtales	y	2	3	3	303	LC	LC	1
865	Campomanesia sessiliflora	Brazil South	Campomanesia	Myrtaceae	Myrtales	y	0			304	LC	LC	0
866	Campomanesia sessiliflora	Brazil West-Central	Campomanesia	Myrtaceae	Myrtales	y	0			304	LC	LC	0
867	Campomanesia velutina	Brazil West-Central	Campomanesia	Myrtaceae	Myrtales	y	0			12659	LC	LC	0
868	Campomanesia xanthocarpa	Brazil South	Campomanesia	Myrtaceae	Myrtales	y	0			305	LC	LC	0
869	Campomanesia xanthocarpa	Brazil West-Central	Campomanesia	Myrtaceae	Myrtales	y	0			305	LC	LC	0
870	Campsiandra angustifolia	Brazil West-Central	Campsiandra	Fabaceae	Fabales	n	0			17382	LC	LC	0
871	Canella winterana	Mexico Southeast	Canella	Canellaceae	Canellales	y	0			14295	LC	LC	0
872	Capirona decorticans	Brazil West-Central	Capirona	Rubiaceae	Gentianales	n	0			5606	LC	LC	0
873	Capparicordis tweediana	Brazil West-Central	Capparicordis	Capparaceae	Brassicales	y	0			306	LC	LC	0
874	Capparidastrum coimbranum	Brazil West-Central	Capparidastrum	Capparaceae	Brassicales	y	2	5	3	9109	LC	LC	1
875	Capparidastrum discolor	Mexico Southeast	Capparidastrum	Capparaceae	Brassicales	y	2	>10	2	16561	LC	LC	1
876	Capparidastrum frondosum	Brazil South	Capparidastrum	Capparaceae	Brassicales	y	0			3749	LC	LC	0
877	Capparidastrum mollicellum	Mexico Southeast	Capparidastrum	Capparaceae	Brassicales	y	0			17839	LC	LC	0
878	Capparidastrum osmanthum	Brazil West-Central	Capparidastrum	Capparaceae	Brassicales	y	2	6	3	12595	LC	LC	1
879	Capparidastrum pachaca	Mexico Southeast	Capparidastrum	Capparaceae	Brassicales	y	2	3	4	14651	LC	LC	1
880	Capparidastrum quiriguense	Mexico Southeast	Capparidastrum	Capparaceae	Brassicales	y	4			16548	NT	LC	1
881	Capparidastrum solum	Brazil West-Central	Capparidastrum	Capparaceae	Brassicales	y	0			307	LC	LC	0
882	Capparis heydeana	Mexico Southeast	Capparis	Capparaceae	Brassicales	y	0			308	LC	LC	0
883	Caraipa densifolia	Brazil West-Central	Caraipa	Calophyllaceae	Malpighiales	y	0			16463	LC	LC	0
884	Caraipa punctulata	Brazil West-Central	Caraipa	Calophyllaceae	Malpighiales	y	0			2042	LC	LC	0
885	Caraipa savannarum	Brazil West-Central	Caraipa	Calophyllaceae	Malpighiales	y	0			3592	LC	LC	0
886	Carapichea dolichophylla	Brazil West-Central	Carapichea	Rubiaceae	Gentianales	y	0			309	LC	LC	0
887	Carapichea pacimonica	Brazil West-Central	Carapichea	Rubiaceae	Gentianales	y	0			310	LC	LC	0
888	Cardiopetalum calophyllum	Brazil West-Central	Cardiopetalum	Annonaceae	Magnoliales	y	0			11317	LC	LC	0
889	Carica papaya	Mexico Southeast	Carica	Caricaceae	Brassicales	y	2	> 15		311	LC	LC	1
890	Cariniana domestica	Brazil West-Central	Cariniana	Lecythidaceae	Ericales	n	0			312	LC	LC	0
891	Cariniana estrellensis	Brazil South	Cariniana	Lecythidaceae	Ericales	n	0			313	LC	LC	0
892	Cariniana estrellensis	Brazil West-Central	Cariniana	Lecythidaceae	Ericales	n	0			313	LC	LC	0
893	Cariniana ianeirensis	Brazil West-Central	Cariniana	Lecythidaceae	Ericales	n	0			5079	EN	UR	0
894	Cariniana legalis	Brazil South	Cariniana	Lecythidaceae	Ericales	n	0			11290	VU	UR	0
895	Cariniana rubra	Brazil West-Central	Cariniana	Lecythidaceae	Ericales	n	0			7532	LC	LC	0
896	Carpinus caroliniana	Mexico Southeast	Carpinus	Betulaceae	Fagales	n	0			18409	LC	LC	0
897	Carpinus tropicalis	Mexico Southeast	Carpinus	Betulaceae	Fagales	n	0			18439	LC	LC	0
898	Carpotroche longifolia	Brazil West-Central	Carpotroche	Achariaceae	Malpighiales	y	3	4	4	6411	LC	LC	1
899	Caryocar brasiliense	Brazil South	Caryocar	Caryocaraceae	Malpighiales	y	1	7	6	9218	LC	LC	1
900	Caryocar brasiliense	Brazil West-Central	Caryocar	Caryocaraceae	Malpighiales	y	1	7	6	9218	LC	LC	1
901	Caryocar coriaceum	Brazil West-Central	Caryocar	Caryocaraceae	Malpighiales	y	1	5	5	12693	EN	UR	1
902	Caryocar cuneatum	Brazil West-Central	Caryocar	Caryocaraceae	Malpighiales	y	0			7450	LC	LC	0
903	Caryocar dentatum	Brazil West-Central	Caryocar	Caryocaraceae	Malpighiales	y	0			314	LC	LC	0
904	Caryocar glabrum	Brazil West-Central	Caryocar	Caryocaraceae	Malpighiales	y	0			6512	LC	LC	0
905	Caryocar microcarpum	Brazil West-Central	Caryocar	Caryocaraceae	Malpighiales	y	1	7.5	7.5	3286	LC	LC	1
906	Caryocar villosum	Brazil West-Central	Caryocar	Caryocaraceae	Malpighiales	y	1	10	9	2408	LC	LC	1
907	Cascabela gaumeri	Mexico Southeast	Cascabela	Apocynaceae	Gentianales	y	0			16653	LC	LC	0
908	Cascabela ovata	Mexico Southeast	Cascabela	Apocynaceae	Gentianales	y	0			17959	LC	LC	0
909	Cascabela thevetia	Mexico Southeast	Cascabela	Apocynaceae	Gentianales	y	0			16654	LC	LC	0
910	Casearia aculeata	Brazil West-Central	Casearia	Salicaceae	Malpighiales	y	0			8171	LC	LC	0
911	Casearia aculeata	Mexico Southeast	Casearia	Salicaceae	Malpighiales	y	0			8171	LC	LC	0
912	Casearia aculeata	Brazil South	Casearia	Salicaceae	Malpighiales	y	0			8171	LC	LC	0
913	Casearia arborea	Brazil West-Central	Casearia	Salicaceae	Malpighiales	y	0			8181	LC	LC	0
914	Casearia arborea	Mexico Southeast	Casearia	Salicaceae	Malpighiales	y	0			8181	LC	LC	0
915	Casearia arborea	Brazil South	Casearia	Salicaceae	Malpighiales	y	0			8181	LC	LC	0
916	Casearia arguta	Mexico Southeast	Casearia	Salicaceae	Malpighiales	y	0			9598	LC	LC	0
917	Casearia bartlettii	Mexico Southeast	Casearia	Salicaceae	Malpighiales	y	0			315	LC	LC	0
918	Casearia catharinensis	Brazil South	Casearia	Salicaceae	Malpighiales	y	0	3	3	14085	EN	UR	0
919	Casearia combaymensis	Brazil West-Central	Casearia	Salicaceae	Malpighiales	y	0			5631	LC	LC	0
920	Casearia commersoniana	Mexico Southeast	Casearia	Salicaceae	Malpighiales	y	0			1973	LC	LC	0
921	Casearia commersoniana	Brazil West-Central	Casearia	Salicaceae	Malpighiales	y	0			1973	LC	LC	0
922	Casearia corymbosa	Mexico Southeast	Casearia	Salicaceae	Malpighiales	y	0			5858	LC	LC	0
923	Casearia cotticensis	Brazil West-Central	Casearia	Salicaceae	Malpighiales	y	0			316	LC	LC	0
924	Casearia decandra	Brazil West-Central	Casearia	Salicaceae	Malpighiales	y	0			317	LC	LC	0
925	Casearia decandra	Brazil South	Casearia	Salicaceae	Malpighiales	y	0			317	LC	LC	0
926	Casearia duckeana	Brazil West-Central	Casearia	Salicaceae	Malpighiales	y	0			318	LC	LC	0
927	Casearia emarginata	Mexico Southeast	Casearia	Salicaceae	Malpighiales	y	0			319	LC	LC	0
928	Casearia gossypiosperma	Brazil West-Central	Casearia	Salicaceae	Malpighiales	y	0			320	LC	LC	0
929	Casearia gossypiosperma	Brazil South	Casearia	Salicaceae	Malpighiales	y	0			320	LC	LC	0
930	Casearia grandiflora	Brazil West-Central	Casearia	Salicaceae	Malpighiales	y	0			2067	LC	LC	0
931	Casearia lasiophylla	Brazil South	Casearia	Salicaceae	Malpighiales	y	0			321	LC	LC	0
932	Casearia lasiophylla	Brazil West-Central	Casearia	Salicaceae	Malpighiales	y	0			321	LC	LC	0
933	Casearia luetzelburgii	Brazil South	Casearia	Salicaceae	Malpighiales	y	0			12611	LC	LC	0
934	Casearia mariquitensis	Brazil West-Central	Casearia	Salicaceae	Malpighiales	y	0			6910	LC	LC	0
935	Casearia mariquitensis	Brazil South	Casearia	Salicaceae	Malpighiales	y	0			6910	LC	LC	0
936	Casearia melliodora	Brazil South	Casearia	Salicaceae	Malpighiales	y	0			12409	LC	LC	0
937	Casearia murceana	Brazil West-Central	Casearia	Salicaceae	Malpighiales	y	0			2279	VU	UR	0
938	Casearia negrensis	Brazil West-Central	Casearia	Salicaceae	Malpighiales	y	0			18374	LC	LC	0
939	Casearia obliqua	Brazil South	Casearia	Salicaceae	Malpighiales	y	0			11380	LC	LC	0
940	Casearia oblongifolia	Brazil West-Central	Casearia	Salicaceae	Malpighiales	y	0			11576	LC	LC	0
941	Casearia obovalis	Brazil West-Central	Casearia	Salicaceae	Malpighiales	y	0			7010	LC	LC	0
942	Casearia paranaensis	Brazil South	Casearia	Salicaceae	Malpighiales	y	0			13757	NT	LC	0
943	Casearia pitumba	Brazil West-Central	Casearia	Salicaceae	Malpighiales	y	0			7110	LC	LC	0
944	Casearia resinifera	Brazil West-Central	Casearia	Salicaceae	Malpighiales	y	0			1974	LC	LC	0
945	Casearia rupestris	Brazil West-Central	Casearia	Salicaceae	Malpighiales	y	0			5128	LC	LC	0
946	Casearia sanchezii	Mexico Southeast	Casearia	Salicaceae	Malpighiales	y	0			18440	EN	UR	0
947	Casearia sylvestris	Brazil South	Casearia	Salicaceae	Malpighiales	y	0			3644	LC	LC	0
948	Casearia sylvestris	Mexico Southeast	Casearia	Salicaceae	Malpighiales	y	0			3644	LC	LC	0
949	Casearia sylvestris	Brazil West-Central	Casearia	Salicaceae	Malpighiales	y	0			3644	LC	LC	0
950	Casearia tacanensis	Mexico Southeast	Casearia	Salicaceae	Malpighiales	y	0			16563	LC	LC	0
951	Casearia tenuipilosa	Brazil West-Central	Casearia	Salicaceae	Malpighiales	y	0			322	LC	LC	0
952	Casearia ulmifolia	Brazil West-Central	Casearia	Salicaceae	Malpighiales	y	0			5652	LC	LC	0
953	Casimiroa edulis	Mexico Southeast	Casimiroa	Rutaceae	Sapindales	y	1	6	6	17830	LC	LC	1
954	Casimiroa sapota	Mexico Southeast	Casimiroa	Rutaceae	Sapindales	y	1	5	5	323	LC	LC	1
955	Casimiroa tetrameria	Mexico Southeast	Casimiroa	Rutaceae	Sapindales	y	1	5	5	16683	LC	LC	1
956	Cassia fastuosa	Brazil West-Central	Cassia	Fabaceae	Fabales	n	0			5661	LC	LC	0
957	Cassia ferruginea	Brazil West-Central	Cassia	Fabaceae	Fabales	n	0			7500	LC	LC	0
958	Cassia ferruginea	Brazil South	Cassia	Fabaceae	Fabales	n	0			7500	LC	LC	0
959	Cassia grandis	Brazil West-Central	Cassia	Fabaceae	Fabales	n	0			2213	LC	LC	0
960	Cassia grandis	Mexico Southeast	Cassia	Fabaceae	Fabales	n	0			2213	LC	LC	0
961	Cassia leptophylla	Brazil South	Cassia	Fabaceae	Fabales	n	0			13771	LC	LC	0
962	Cassia moschata	Mexico Southeast	Cassia	Fabaceae	Fabales	n	0			5671	LC	LC	0
963	Cassia moschata	Brazil West-Central	Cassia	Fabaceae	Fabales	n	0			5671	LC	LC	0
964	Cassia spruceana	Brazil West-Central	Cassia	Fabaceae	Fabales	n	0			5685	LC	LC	0
965	Cassipourea guianensis	Mexico Southeast	Cassipourea	Rhizophoraceae	Malpighiales	y	0			15141	LC	LC	0
966	Cassipourea peruviana	Brazil West-Central	Cassipourea	Rhizophoraceae	Malpighiales	y	0			9782	LC	LC	0
967	Castela tweediei	Brazil West-Central	Castela	Simaroubaceae	Sapindales	y	0			324	LC	LC	0
968	Castela tweediei	Brazil South	Castela	Simaroubaceae	Sapindales	y	0			324	LC	LC	0
969	Castilla elastica	Mexico Southeast	Castilla	Moraceae	Rosales	y	1	4.5	4.5	7744	LC	LC	1
970	Castilla ulei	Brazil West-Central	Castilla	Moraceae	Rosales	y	0			9791	LC	LC	0
971	Cathedra acuminata	Brazil West-Central	Cathedra	Aptandraceae	Santalales	y	0			5695	LC	LC	0
972	Cavanillesia umbellata	Brazil West-Central	Cavanillesia	Malvaceae	Malvales	n	0			325	LC	LC	0
973	Cavendishia bracteata	Mexico Southeast	Cavendishia	Ericaceae	Ericales	y	0			5369	LC	LC	0
974	Cavendishia callista	Mexico Southeast	Cavendishia	Ericaceae	Ericales	y	0			326	LC	LC	0
975	Cecropia concolor	Brazil West-Central	Cecropia	Urticaceae	Rosales	y	0			12031	LC	LC	0
976	Cecropia distachya	Brazil West-Central	Cecropia	Urticaceae	Rosales	y	0			7210	LC	LC	0
977	Cecropia engleriana	Brazil West-Central	Cecropia	Urticaceae	Rosales	y	0			17391	LC	LC	0
978	Cecropia ficifolia	Brazil West-Central	Cecropia	Urticaceae	Rosales	y	0			7313	LC	LC	0
979	Cecropia glaziovii	Brazil South	Cecropia	Urticaceae	Rosales	y	0			11749	LC	LC	0
980	Cecropia latiloba	Brazil West-Central	Cecropia	Urticaceae	Rosales	y	0			17401	LC	LC	0
981	Cecropia obtusifolia	Mexico Southeast	Cecropia	Urticaceae	Rosales	y	0			9271	LC	LC	0
982	Cecropia pachystachya	Brazil West-Central	Cecropia	Urticaceae	Rosales	y	0			327	LC	LC	0
983	Cecropia pachystachya	Brazil South	Cecropia	Urticaceae	Rosales	y	0	8	0.8	327	LC	LC	0
984	Cecropia palmata	Brazil West-Central	Cecropia	Urticaceae	Rosales	y	0			3152	LC	LC	0
985	Cecropia peltata	Mexico Southeast	Cecropia	Urticaceae	Rosales	y	0			4539	LC	LC	0
986	Cecropia purpurascens	Brazil West-Central	Cecropia	Urticaceae	Rosales	y	0			2728	LC	LC	0
987	Cecropia saxatilis	Brazil West-Central	Cecropia	Urticaceae	Rosales	y	0			12271	LC	LC	0
988	Cecropia sciadophylla	Brazil West-Central	Cecropia	Urticaceae	Rosales	y	0			5722	LC	LC	0
989	Cedrela fissilis	Brazil West-Central	Cedrela	Meliaceae	Sapindales	n	0			12042	VU	UR	0
990	Cedrela fissilis	Brazil South	Cedrela	Meliaceae	Sapindales	n	0			12042	VU	UR	0
991	Cedrela oaxacensis	Mexico Southeast	Cedrela	Meliaceae	Sapindales	n	0			19690	EN	UR	0
992	Cedrela odorata	Mexico Southeast	Cedrela	Meliaceae	Sapindales	n	0			9801	VU	UR	0
993	Cedrela odorata	Brazil South	Cedrela	Meliaceae	Sapindales	n	0			9801	VU	UR	0
994	Cedrela odorata	Brazil West-Central	Cedrela	Meliaceae	Sapindales	n	0			9801	VU	UR	0
995	Cedrela salvadorensis	Mexico Southeast	Cedrela	Meliaceae	Sapindales	n	0			17585	LC	LC	0
996	Cedrela tonduzii	Mexico Southeast	Cedrela	Meliaceae	Sapindales	n	0			17539	LC	LC	0
997	Cedrelinga cateniformis	Brazil West-Central	Cedrelinga	Fabaceae	Fabales	n	0			7412	LC	LC	0
998	Ceiba acuminata	Mexico Southeast	Ceiba	Malvaceae	Malvales	n	0			19396	LC	LC	0
999	Ceiba aesculifolia	Mexico Southeast	Ceiba	Malvaceae	Malvales	n	0			16655	LC	LC	0
1000	Ceiba pentandra	Brazil West-Central	Ceiba	Malvaceae	Malvales	n	0			18391	LC	LC	0
1001	Ceiba pentandra	Mexico Southeast	Ceiba	Malvaceae	Malvales	n	0			18391	LC	LC	0
1002	Ceiba pubiflora	Brazil West-Central	Ceiba	Malvaceae	Malvales	n	0			328	LC	LC	0
1003	Ceiba samauma	Brazil West-Central	Ceiba	Malvaceae	Malvales	n	0			329	LC	LC	0
1004	Ceiba schottii	Mexico Southeast	Ceiba	Malvaceae	Malvales	n	0			18678	LC	LC	0
1005	Ceiba speciosa	Brazil South	Ceiba	Malvaceae	Malvales	n	0			330	LC	LC	0
1006	Ceiba speciosa	Brazil West-Central	Ceiba	Malvaceae	Malvales	n	0			330	LC	LC	0
1007	Celtis brasiliensis	Brazil West-Central	Celtis	Cannabaceae	Rosales	y	0			4905	LC	LC	0
1008	Celtis brasiliensis	Brazil South	Celtis	Cannabaceae	Rosales	y	0			4905	LC	LC	0
1009	Celtis caudata	Mexico Southeast	Celtis	Cannabaceae	Rosales	y	0			18410	LC	LC	0
1010	Celtis chichape	Brazil West-Central	Celtis	Cannabaceae	Rosales	y	0			8711	LC	LC	0
1011	Celtis chichape	Brazil South	Celtis	Cannabaceae	Rosales	y	0			8711	LC	LC	0
1012	Celtis ehrenbergiana	Brazil South	Celtis	Cannabaceae	Rosales	y	0			8712	LC	LC	0
1013	Celtis iguanaea	Brazil West-Central	Celtis	Cannabaceae	Rosales	y	0			2139	LC	LC	0
1014	Celtis iguanaea	Brazil South	Celtis	Cannabaceae	Rosales	y	0			2139	LC	LC	0
1015	Celtis iguanaea	Mexico Southeast	Celtis	Cannabaceae	Rosales	y	0			2139	LC	LC	0
1016	Celtis schippii	Brazil West-Central	Celtis	Cannabaceae	Rosales	y	0			7511	LC	LC	0
1017	Celtis trinervia	Mexico Southeast	Celtis	Cannabaceae	Rosales	y	0			331	LC	LC	0
1018	Cenostigma bracteosum	Brazil West-Central	Cenostigma	Fabaceae	Fabales	n	0			12710	LC	LC	0
1019	Cenostigma eriostachys	Mexico Southeast	Cenostigma	Fabaceae	Fabales	n	0			15046	LC	LC	0
1020	Cenostigma gaumeri	Mexico Southeast	Cenostigma	Fabaceae	Fabales	n	0			332	LC	LC	0
1021	Cenostigma macrophyllum	Brazil South	Cenostigma	Fabaceae	Fabales	n	0			7501	LC	LC	0
1022	Cenostigma macrophyllum	Brazil West-Central	Cenostigma	Fabaceae	Fabales	n	0			7501	LC	LC	0
1023	Cenostigma marginatum	Brazil West-Central	Cenostigma	Fabaceae	Fabales	n	0			333	LC	LC	0
1024	Cenostigma pluviosum	Brazil West-Central	Cenostigma	Fabaceae	Fabales	n	0			334	LC	LC	0
1025	Cenostigma tocantinum	Brazil West-Central	Cenostigma	Fabaceae	Fabales	n	0			7510	LC	LC	0
1026	Centrolobium microchaete	Brazil South	Centrolobium	Fabaceae	Fabales	n	0			4906	LC	LC	0
1027	Centrolobium robustum	Brazil South	Centrolobium	Fabaceae	Fabales	n	0			335	LC	LC	0
1028	Centrolobium tomentosum	Brazil West-Central	Centrolobium	Fabaceae	Fabales	n	0			336	LC	LC	0
1029	Centrolobium tomentosum	Brazil South	Centrolobium	Fabaceae	Fabales	n	0			336	LC	LC	0
1030	Cephalocereus apicicephalium	Mexico Southeast	Cephalocereus	Cactaceae	Caryophyllales	y	0			19318	LC	LC	0
1031	Cereus bicolor	Brazil West-Central	Cereus	Cactaceae	Caryophyllales	y	3			13608	LC	LC	1
1032	Cereus hildmannianus	Brazil South	Cereus	Cactaceae	Caryophyllales	y	3			13576	LC	LC	1
1033	Cereus hildmannianus	Brazil West-Central	Cereus	Cactaceae	Caryophyllales	y	3			13576	LC	LC	1
1034	Cereus jamacaru	Brazil West-Central	Cereus	Cactaceae	Caryophyllales	y	3	12		11661	LC	LC	1
1035	Cereus pierrebraunianus	Brazil West-Central	Cereus	Cactaceae	Caryophyllales	y	3			337	EN	UR	1
1036	Cereus saddianus	Brazil West-Central	Cereus	Cactaceae	Caryophyllales	y	3			16080	CR	UR	1
1037	Cereus stenogonus	Brazil West-Central	Cereus	Cactaceae	Caryophyllales	y	3			9124	LC	LC	1
1038	Cereus uruguayanus	Brazil South	Cereus	Cactaceae	Caryophyllales	y	3			338	LC	LC	1
1039	Cespedesia spathulata	Brazil West-Central	Cespedesia	Ochnaceae	Malpighiales	n	0			15151	LC	LC	0
1040	Cestrum alternifolium	Mexico Southeast	Cestrum	Solanaceae	Solanales	y	0			6022	LC	LC	0
1041	Cestrum axillare	Brazil South	Cestrum	Solanaceae	Solanales	y	0			2140	LC	LC	0
1042	Cestrum axillare	Brazil West-Central	Cestrum	Solanaceae	Solanales	y	0			2140	LC	LC	0
1043	Cestrum bracteatum	Brazil South	Cestrum	Solanaceae	Solanales	y	0			8865	LC	LC	0
1044	Cestrum euanthes	Brazil South	Cestrum	Solanaceae	Solanales	y	0			339	LC	LC	0
1045	Cestrum intermedium	Brazil South	Cestrum	Solanaceae	Solanales	y	0			12041	LC	LC	0
1046	Cestrum latifolium	Brazil West-Central	Cestrum	Solanaceae	Solanales	y	0			4412	LC	LC	0
1047	Cestrum mariquitense	Brazil West-Central	Cestrum	Solanaceae	Solanales	y	0			2946	LC	LC	0
1048	Cestrum mariquitense	Brazil South	Cestrum	Solanaceae	Solanales	y	0			2946	LC	LC	0
1049	Cestrum nocturnum	Mexico Southeast	Cestrum	Solanaceae	Solanales	y	0			16260	LC	LC	0
1050	Cestrum obovatum	Brazil West-Central	Cestrum	Solanaceae	Solanales	y	0			340	LC	LC	0
1051	Cestrum parqui	Brazil South	Cestrum	Solanaceae	Solanales	y	0			8713	LC	LC	0
1052	Cestrum parqui	Brazil West-Central	Cestrum	Solanaceae	Solanales	y	0			8713	LC	LC	0
1053	Cestrum parqui	Chile Central	Cestrum	Solanaceae	Solanales	y	0			8713	LC	LC	0
1054	Cestrum pedicellatum	Brazil West-Central	Cestrum	Solanaceae	Solanales	y	0			341	LC	LC	0
1055	Cestrum racemosum	Mexico Southeast	Cestrum	Solanaceae	Solanales	y	0			5176	LC	LC	0
1056	Cestrum reflexum	Brazil West-Central	Cestrum	Solanaceae	Solanales	y	0			342	LC	LC	0
1057	Cestrum retrofractum	Brazil West-Central	Cestrum	Solanaceae	Solanales	y	0			343	LC	LC	0
1058	Cestrum salzmannii	Brazil West-Central	Cestrum	Solanaceae	Solanales	y	0			11306	LC	LC	0
1059	Cestrum schlechtendalii	Brazil West-Central	Cestrum	Solanaceae	Solanales	y	0			5742	LC	LC	0
1060	Cestrum schlechtendalii	Mexico Southeast	Cestrum	Solanaceae	Solanales	y	0			5742	LC	LC	0
1061	Cestrum schlechtendalii	Brazil South	Cestrum	Solanaceae	Solanales	y	0			5742	LC	LC	0
1062	Cestrum strictum	Brazil South	Cestrum	Solanaceae	Solanales	y	0			344	EN	UR	0
1063	Cestrum strigilatum	Brazil South	Cestrum	Solanaceae	Solanales	y	0			15172	LC	LC	0
1064	Cestrum strigilatum	Brazil West-Central	Cestrum	Solanaceae	Solanales	y	0			15172	LC	LC	0
1065	Cestrum tomentosum	Mexico Southeast	Cestrum	Solanaceae	Solanales	y	0			9231	LC	LC	0
1066	Cestrum velutinum	Brazil West-Central	Cestrum	Solanaceae	Solanales	y	0			345	LC	LC	0
1067	Chaetocarpus echinocarpus	Brazil West-Central	Chaetocarpus	Peraceae	Malpighiales	n	0			3797	LC	LC	0
1068	Chaetocarpus myrsinites	Brazil West-Central	Chaetocarpus	Peraceae	Malpighiales	n	0			5296	LC	LC	0
1069	Chaetocarpus schomburgkianus	Brazil West-Central	Chaetocarpus	Peraceae	Malpighiales	n	0			5751	LC	LC	0
1070	Chamaecrista apoucouita	Brazil South	Chamaecrista	Fabaceae	Fabales	n	0			3789	LC	LC	0
1071	Chamaecrista brachystachya	Brazil West-Central	Chamaecrista	Fabaceae	Fabales	n	0			11525	LC	LC	0
1072	Chamaecrista chaetostegia	Brazil West-Central	Chamaecrista	Fabaceae	Fabales	n	0			346	EN	UR	0
1073	Chamaecrista confertiformis	Brazil West-Central	Chamaecrista	Fabaceae	Fabales	n	0			12630	NT	LC	0
1074	Chamaecrista dumalis	Brazil West-Central	Chamaecrista	Fabaceae	Fabales	n	0			347	LC	LC	0
1075	Chamaecrista eitenorum	Brazil West-Central	Chamaecrista	Fabaceae	Fabales	n	0			12391	LC	LC	0
1076	Chamaecrista ensiformis	Brazil West-Central	Chamaecrista	Fabaceae	Fabales	n	0			2784	LC	LC	0
1077	Chamaecrista fulgida	Brazil West-Central	Chamaecrista	Fabaceae	Fabales	n	0			16047	CR	UR	0
1078	Chamaecrista machaeriifolia	Brazil West-Central	Chamaecrista	Fabaceae	Fabales	n	0			15953	LC	LC	0
1079	Chamaecrista multiseta	Brazil West-Central	Chamaecrista	Fabaceae	Fabales	n	0			4351	LC	LC	0
1080	Chamaecrista orbiculata	Brazil West-Central	Chamaecrista	Fabaceae	Fabales	n	0			12694	LC	LC	0
1081	Chamaecrista pachyclada	Brazil West-Central	Chamaecrista	Fabaceae	Fabales	n	0			348	EN	UR	0
1082	Chamaecrista spinulosa	Brazil West-Central	Chamaecrista	Fabaceae	Fabales	n	0			349	EN	UR	0
1083	Chamaecrista zygophylloides	Mexico Southeast	Chamaecrista	Fabaceae	Fabales	n	0			7035	LC	LC	0
1084	Chamaedorea arenbergiana	Mexico Southeast	Chamaedorea	Arecaceae	Arecales	n	0			350	LC	LC	0
1085	Chamaedorea carchensis	Mexico Southeast	Chamaedorea	Arecaceae	Arecales	n	0			18628	LC	LC	0
1086	Chamaedorea elatior	Mexico Southeast	Chamaedorea	Arecaceae	Arecales	n	0			18892	LC	LC	0
1087	Chamaedorea glaucifolia	Mexico Southeast	Chamaedorea	Arecaceae	Arecales	n	0			19898	EN	UR	0
1088	Chamaedorea keelerorum	Mexico Southeast	Chamaedorea	Arecaceae	Arecales	n	0			18738	LC	LC	0
1089	Chamaedorea pinnatifrons	Brazil West-Central	Chamaedorea	Arecaceae	Arecales	n	0			7610	LC	LC	0
1090	Chamaedorea pinnatifrons	Mexico Southeast	Chamaedorea	Arecaceae	Arecales	n	0			7610	LC	LC	0
1091	Chamaedorea plumosa	Mexico Southeast	Chamaedorea	Arecaceae	Arecales	n	0			19549	CR	UR	0
1092	Chamaedorea sartorii	Mexico Southeast	Chamaedorea	Arecaceae	Arecales	n	0			351	LC	LC	0
1093	Chamaedorea tepejilote	Mexico Southeast	Chamaedorea	Arecaceae	Arecales	n	0			352	LC	LC	0
1094	Chamaedorea woodsoniana	Mexico Southeast	Chamaedorea	Arecaceae	Arecales	n	0			353	LC	LC	0
1095	Chamguava gentlei	Mexico Southeast	Chamguava	Myrtaceae	Myrtales	y	0			354	LC	LC	0
1096	Chamguava schippii	Mexico Southeast	Chamguava	Myrtaceae	Myrtales	y	0			16646	LC	LC	0
1097	Chaunochiton kappleri	Brazil West-Central	Chaunochiton	Aptandraceae	Santalales	n	0			2214	LC	LC	0
1098	Cheiloclinium cognatum	Brazil West-Central	Cheiloclinium	Celastraceae	Celastrales	y	1	3	4	7710	LC	LC	1
1099	Chiangiodendron mexicanum	Mexico Southeast	Chiangiodendron	Achariaceae	Malpighiales	n	0			16298	EN	UR	0
1100	Chimarrhis barbata	Brazil West-Central	Chimarrhis	Rubiaceae	Gentianales	y	0			355	LC	LC	0
1101	Chiococca belizensis	Mexico Southeast	Chiococca	Rubiaceae	Gentianales	y	0			16299	LC	LC	0
1102	Chiococca pachyphylla	Mexico Southeast	Chiococca	Rubiaceae	Gentianales	y	0			6055	LC	LC	0
1103	Chiococca semipilosa	Mexico Southeast	Chiococca	Rubiaceae	Gentianales	y	0			356	LC	LC	0
1104	Chiococca sessilifolia	Mexico Southeast	Chiococca	Rubiaceae	Gentianales	y	0			19542	EN	UR	0
1105	Chionanthus crassifolius	Brazil South	Chionanthus	Oleaceae	Lamiales	y	0			357	LC	LC	0
1106	Chionanthus crassifolius	Brazil West-Central	Chionanthus	Oleaceae	Lamiales	y	0			357	LC	LC	0
1107	Chionanthus ligustrinus	Mexico Southeast	Chionanthus	Oleaceae	Lamiales	y	0			358	LC	LC	0
1108	Chionanthus oblanceolatus	Mexico Southeast	Chionanthus	Oleaceae	Lamiales	y	0			16565	LC	LC	0
1109	Chionanthus panamensis	Mexico Southeast	Chionanthus	Oleaceae	Lamiales	y	0			16462	LC	LC	0
1110	Chionanthus trichotomus	Brazil West-Central	Chionanthus	Oleaceae	Lamiales	y	0			359	LC	LC	0
1111	Chionanthus trichotomus	Brazil South	Chionanthus	Oleaceae	Lamiales	y	0			359	LC	LC	0
1112	Chione venosa	Mexico Southeast	Chione	Rubiaceae	Gentianales	y	0			360	LC	LC	0
1113	Chiranthodendron pentadactylon	Mexico Southeast	Chiranthodendron	Malvaceae	Malvales	n	0			18723	LC	LC	0
1114	Chloroleucon acacioides	Brazil West-Central	Chloroleucon	Fabaceae	Fabales	n	0			4515	LC	LC	0
1115	Chloroleucon dumosum	Brazil West-Central	Chloroleucon	Fabaceae	Fabales	n	0			11974	LC	LC	0
1116	Chloroleucon foliolosum	Brazil West-Central	Chloroleucon	Fabaceae	Fabales	n	0			361	LC	LC	0
1117	Chloroleucon mangense	Brazil West-Central	Chloroleucon	Fabaceae	Fabales	n	0			2143	LC	LC	0
1118	Chloroleucon mangense	Mexico Southeast	Chloroleucon	Fabaceae	Fabales	n	0			2143	LC	LC	0
1119	Chloroleucon tenuiflorum	Brazil West-Central	Chloroleucon	Fabaceae	Fabales	n	0			5026	LC	LC	0
1120	Chomelia brachypoda	Mexico Southeast	Chomelia	Rubiaceae	Gentianales	y	0			18797	EN	UR	0
1121	Chomelia brasiliana	Brazil South	Chomelia	Rubiaceae	Gentianales	y	0			13098	LC	LC	0
1122	Chomelia brasiliana	Brazil West-Central	Chomelia	Rubiaceae	Gentianales	y	0			13098	LC	LC	0
1123	Chomelia breedlovei	Mexico Southeast	Chomelia	Rubiaceae	Gentianales	y	0			19912	EN	UR	0
1124	Chomelia crassifolia	Mexico Southeast	Chomelia	Rubiaceae	Gentianales	y	0			19890	EN	UR	0
1125	Chomelia kirkbridei	Brazil West-Central	Chomelia	Rubiaceae	Gentianales	y	0			362	EN	UR	0
1126	Chomelia martiana	Brazil West-Central	Chomelia	Rubiaceae	Gentianales	y	0			363	LC	LC	0
1127	Chomelia obtusa	Brazil South	Chomelia	Rubiaceae	Gentianales	y	0			364	LC	LC	0
1128	Chomelia obtusa	Brazil West-Central	Chomelia	Rubiaceae	Gentianales	y	0			364	LC	LC	0
1129	Chomelia parviflora	Brazil West-Central	Chomelia	Rubiaceae	Gentianales	y	0			7615	LC	LC	0
1130	Chomelia parvifolia	Brazil South	Chomelia	Rubiaceae	Gentianales	y	0			13672	LC	LC	0
1131	Chomelia pedunculosa	Brazil South	Chomelia	Rubiaceae	Gentianales	y	0			11315	LC	LC	0
1132	Chomelia pohliana	Brazil West-Central	Chomelia	Rubiaceae	Gentianales	y	0			12379	LC	LC	0
1133	Chomelia protracta	Mexico Southeast	Chomelia	Rubiaceae	Gentianales	y	0			365	LC	LC	0
1134	Chomelia spinosa	Mexico Southeast	Chomelia	Rubiaceae	Gentianales	y	0			16471	LC	LC	0
1135	Chomelia spinosa	Brazil West-Central	Chomelia	Rubiaceae	Gentianales	y	0			16471	LC	LC	0
1136	Chomelia tenuiflora	Brazil West-Central	Chomelia	Rubiaceae	Gentianales	y	0			12061	LC	LC	0
1137	Christiana africana	Brazil West-Central	Christiana	Malvaceae	Malvales	n	0			4383	LC	LC	0
1138	Christiana africana	Mexico Southeast	Christiana	Malvaceae	Malvales	n	0			4383	LC	LC	0
1139	Christiana macrodon	Brazil South	Christiana	Malvaceae	Malvales	n	0			13780	EN	UR	0
1140	Chronopappus bifrons	Brazil West-Central	Chronopappus	Asteraceae	Asterales	n	0			366	LC	LC	0
1141	Chrysobalanus icaco	Mexico Southeast	Chrysobalanus	Chrysobalanaceae	Malpighiales	y	0			2729	LC	LC	0
1142	Chrysobalanus icaco	Brazil West-Central	Chrysobalanus	Chrysobalanaceae	Malpighiales	y	0			2729	LC	LC	0
1143	Chrysophyllum amazonicum	Brazil West-Central	Chrysophyllum	Sapotaceae	Ericales	y	1	3	4	5761	LC	LC	1
1144	Chrysophyllum cainito	Mexico Southeast	Chrysophyllum	Sapotaceae	Ericales	y	1	5	5	367	LC	LC	1
1145	Chrysophyllum gonocarpum	Brazil West-Central	Chrysophyllum	Sapotaceae	Ericales	y	0			2144	LC	LC	0
1146	Chrysophyllum gonocarpum	Brazil South	Chrysophyllum	Sapotaceae	Ericales	y	0			2144	LC	LC	0
1147	Chrysophyllum lucentifolium	Brazil West-Central	Chrysophyllum	Sapotaceae	Ericales	y	1	4	3	16491	LC	LC	1
1148	Chrysophyllum marginatum	Brazil West-Central	Chrysophyllum	Sapotaceae	Ericales	y	0			8714	LC	LC	0
1149	Chrysophyllum marginatum	Brazil South	Chrysophyllum	Sapotaceae	Ericales	y	0			8714	LC	LC	0
1150	Chrysophyllum mexicanum	Mexico Southeast	Chrysophyllum	Sapotaceae	Ericales	y	0			9612	LC	LC	0
1151	Chrysophyllum oliviforme	Mexico Southeast	Chrysophyllum	Sapotaceae	Ericales	y	0			14385	LC	LC	0
1152	Chrysophyllum paranaense	Brazil South	Chrysophyllum	Sapotaceae	Ericales	y	0			13673	VU	UR	0
1153	Chrysophyllum prieurii	Brazil West-Central	Chrysophyllum	Sapotaceae	Ericales	y	0			8313	LC	LC	0
1154	Chrysophyllum sanguinolentum	Brazil West-Central	Chrysophyllum	Sapotaceae	Ericales	y	0			15192	LC	LC	0
1155	Chrysophyllum sparsiflorum	Brazil West-Central	Chrysophyllum	Sapotaceae	Ericales	y	0			2602	LC	LC	0
1156	Chrysophyllum venezuelanense	Mexico Southeast	Chrysophyllum	Sapotaceae	Ericales	y	1	4	4	15201	LC	LC	1
1157	Ciliosemina pedunculata	Brazil West-Central	Ciliosemina	Rubiaceae	Gentianales	n	0			4488	LC	LC	0
1158	Cinnamodendron axillare	Brazil South	Cinnamodendron	Canellaceae	Canellales	y	0			13774	EN	UR	0
1159	Cinnamodendron dinisii	Brazil South	Cinnamodendron	Canellaceae	Canellales	y	0			13214	LC	LC	0
1160	Citharexylum caudatum	Mexico Southeast	Citharexylum	Verbenaceae	Lamiales	y	0			10071	LC	LC	0
1161	Citharexylum crassifolium	Mexico Southeast	Citharexylum	Verbenaceae	Lamiales	y	0			16568	EN	UR	0
1162	Citharexylum donnell	Mexico Southeast	Citharexylum	Verbenaceae	Lamiales	y	0			368	LC	LC	0
1163	Citharexylum ellipticum	Mexico Southeast	Citharexylum	Verbenaceae	Lamiales	y	0			19454	VU	UR	0
1164	Citharexylum glabrum	Mexico Southeast	Citharexylum	Verbenaceae	Lamiales	y	0			19705	LC	LC	0
1165	Citharexylum glaziovii	Brazil South	Citharexylum	Verbenaceae	Lamiales	y	0			369	LC	LC	0
1166	Citharexylum hexangulare	Mexico Southeast	Citharexylum	Verbenaceae	Lamiales	y	0			370	LC	LC	0
1167	Citharexylum hirtellum	Mexico Southeast	Citharexylum	Verbenaceae	Lamiales	y	0			16614	LC	LC	0
1168	Citharexylum macrophyllum	Brazil West-Central	Citharexylum	Verbenaceae	Lamiales	y	0			8511	LC	LC	0
1169	Citharexylum mocinnoi	Mexico Southeast	Citharexylum	Verbenaceae	Lamiales	y	0			18013	LC	LC	0
1170	Citharexylum montevidense	Brazil South	Citharexylum	Verbenaceae	Lamiales	y	0			11492	LC	LC	0
1171	Citharexylum myrianthum	Brazil West-Central	Citharexylum	Verbenaceae	Lamiales	y	0			371	LC	LC	0
1172	Citharexylum myrianthum	Brazil South	Citharexylum	Verbenaceae	Lamiales	y	0			371	LC	LC	0
1173	Citharexylum poeppigii	Brazil West-Central	Citharexylum	Verbenaceae	Lamiales	y	0			13471	LC	LC	0
1174	Citharexylum schottii	Mexico Southeast	Citharexylum	Verbenaceae	Lamiales	y	0			17831	LC	LC	0
1175	Citharexylum solanaceum	Brazil South	Citharexylum	Verbenaceae	Lamiales	y	0			13132	LC	LC	0
1176	Citharexylum steyermarkii	Mexico Southeast	Citharexylum	Verbenaceae	Lamiales	y	0			18751	EN	UR	0
1177	Citronella engleriana	Brazil South	Citronella	Cardiopteridaceae	Aquifoliales	y	0			372	LC	LC	0
1178	Citronella gongonha	Brazil West-Central	Citronella	Cardiopteridaceae	Aquifoliales	y	0			11479	LC	LC	0
1179	Citronella gongonha	Brazil South	Citronella	Cardiopteridaceae	Aquifoliales	y	0			11479	LC	LC	0
1180	Citronella mucronata	Chile Central	Citronella	Cardiopteridaceae	Aquifoliales	y	0			16216	LC	LC	0
1181	Citronella paniculata	Brazil South	Citronella	Cardiopteridaceae	Aquifoliales	y	0			373	LC	LC	0
1182	Clarisia biflora	Mexico Southeast	Clarisia	Moraceae	Rosales	y	0			9841	LC	LC	0
1183	Clarisia biflora	Brazil West-Central	Clarisia	Moraceae	Rosales	y	0			9841	LC	LC	0
1184	Clarisia ilicifolia	Brazil West-Central	Clarisia	Moraceae	Rosales	y	0			13481	LC	LC	0
1185	Clarisia racemosa	Brazil West-Central	Clarisia	Moraceae	Rosales	y	0			8611	LC	LC	0
1186	Clathrotropis nitida	Brazil West-Central	Clathrotropis	Fabaceae	Fabales	n	0			19281	LC	LC	0
1187	Clavija lancifolia	Brazil West-Central	Clavija	Primulaceae	Ericales	y	0			14252	LC	LC	0
1188	Clavija nutans	Brazil South	Clavija	Primulaceae	Ericales	y	0			374	LC	LC	0
1189	Clavija nutans	Brazil West-Central	Clavija	Primulaceae	Ericales	y	0			374	LC	LC	0
1190	Cleidion amazonicum	Brazil West-Central	Cleidion	Euphorbiaceae	Malpighiales	n	0			186910	LC	LC	0
1191	Cleidion castaneifolium	Mexico Southeast	Cleidion	Euphorbiaceae	Malpighiales	n	0			5147	LC	LC	0
1192	Clethra alcoceri	Mexico Southeast	Clethra	Clethraceae	Ericales	y	0			19104	VU	UR	0
1193	Clethra chiapensis	Mexico Southeast	Clethra	Clethraceae	Ericales	y	0			19943	EN	UR	0
1194	Clethra galeottiana	Mexico Southeast	Clethra	Clethraceae	Ericales	y	0			19820	LC	LC	0
1195	Clethra lanata	Mexico Southeast	Clethra	Clethraceae	Ericales	y	0			375	LC	LC	0
1196	Clethra mexicana	Mexico Southeast	Clethra	Clethraceae	Ericales	y	0			16569	LC	LC	0
1197	Clethra occidentalis	Mexico Southeast	Clethra	Clethraceae	Ericales	y	0			376	LC	LC	0
1198	Clethra oleoides	Mexico Southeast	Clethra	Clethraceae	Ericales	y	0			18561	VU	UR	0
1199	Clethra pachecoana	Mexico Southeast	Clethra	Clethraceae	Ericales	y	0			18562	VU	UR	0
1200	Clethra scabra	Brazil South	Clethra	Clethraceae	Ericales	y	0			5249	LC	LC	0
1201	Clethra suaveolens	Mexico Southeast	Clethra	Clethraceae	Ericales	y	0			18441	LC	LC	0
1202	Clethra uleana	Brazil South	Clethra	Clethraceae	Ericales	y	0			377	LC	LC	0
1203	Clethra vicentina	Mexico Southeast	Clethra	Clethraceae	Ericales	y	0			18442	LC	LC	0
1204	Cleyera theoides	Mexico Southeast	Cleyera	Pentaphylacaceae	Ericales	y	0			14830	LC	LC	0
1205	Clitoria amazonum	Brazil West-Central	Clitoria	Fabaceae	Fabales	n	0			18415	LC	LC	0
1206	Clitoria arborea	Brazil West-Central	Clitoria	Fabaceae	Fabales	n	0			8910	LC	LC	0
1207	Clitoria fairchildiana	Brazil West-Central	Clitoria	Fabaceae	Fabales	n	0			4648	LC	LC	0
1208	Clitoria glaberrima	Mexico Southeast	Clitoria	Fabaceae	Fabales	n	0			14671	LC	LC	0
1209	Clusia amazonica	Brazil West-Central	Clusia	Clusiaceae	Malpighiales	y	0			16506	LC	LC	0
1210	Clusia belizensis	Mexico Southeast	Clusia	Clusiaceae	Malpighiales	y	0			378	LC	LC	0
1211	Clusia burchellii	Brazil West-Central	Clusia	Clusiaceae	Malpighiales	y	0			16021	EN	UR	0
1212	Clusia columnaris	Brazil West-Central	Clusia	Clusiaceae	Malpighiales	y	0			2303	LC	LC	0
1213	Clusia criuva	Brazil West-Central	Clusia	Clusiaceae	Malpighiales	y	0			379	LC	LC	0
1214	Clusia criuva	Brazil South	Clusia	Clusiaceae	Malpighiales	y	0			379	LC	LC	0
1215	Clusia flava	Mexico Southeast	Clusia	Clusiaceae	Malpighiales	y	0			15436	LC	LC	0
1216	Clusia gardneri	Brazil West-Central	Clusia	Clusiaceae	Malpighiales	y	0			380	LC	LC	0
1217	Clusia grandiflora	Brazil West-Central	Clusia	Clusiaceae	Malpighiales	y	0			2785	LC	LC	0
1218	Clusia guatemalensis	Mexico Southeast	Clusia	Clusiaceae	Malpighiales	y	0			381	LC	LC	0
1219	Clusia insignis	Brazil West-Central	Clusia	Clusiaceae	Malpighiales	y	0			16512	LC	LC	0
1220	Clusia leprantha	Brazil West-Central	Clusia	Clusiaceae	Malpighiales	y	0			2409	LC	LC	0
1221	Clusia lundellii	Mexico Southeast	Clusia	Clusiaceae	Malpighiales	y	0			382	LC	LC	0
1222	Clusia lusoria	Mexico Southeast	Clusia	Clusiaceae	Malpighiales	y	0			383	LC	LC	0
1223	Clusia microstemon	Brazil West-Central	Clusia	Clusiaceae	Malpighiales	y	0			1976	LC	LC	0
1224	Clusia minor	Mexico Southeast	Clusia	Clusiaceae	Malpighiales	y	0			3904	LC	LC	0
1225	Clusia nemorosa	Brazil West-Central	Clusia	Clusiaceae	Malpighiales	y	0			2638	LC	LC	0
1226	Clusia panapanari	Brazil West-Central	Clusia	Clusiaceae	Malpighiales	y	0			3084	LC	LC	0
1227	Clusia penduliflora	Brazil West-Central	Clusia	Clusiaceae	Malpighiales	y	0			2674	LC	LC	0
1228	Clusia quadrangula	Mexico Southeast	Clusia	Clusiaceae	Malpighiales	y	0			16377	LC	LC	0
1229	Clusia renggerioides	Brazil West-Central	Clusia	Clusiaceae	Malpighiales	y	0			3645	LC	LC	0
1230	Clusia rosea	Mexico Southeast	Clusia	Clusiaceae	Malpighiales	y	0			5532	LC	LC	0
1231	Clusia salvinii	Mexico Southeast	Clusia	Clusiaceae	Malpighiales	y	0			10948	LC	LC	0
1232	Clusia schomburgkiana	Brazil West-Central	Clusia	Clusiaceae	Malpighiales	y	0			2455	LC	LC	0
1233	Clusia spathulifolia	Brazil West-Central	Clusia	Clusiaceae	Malpighiales	y	0			384	LC	LC	0
1234	Clusia tetra	Mexico Southeast	Clusia	Clusiaceae	Malpighiales	y	0			385	LC	LC	0
1235	Clusia weddelliana	Brazil West-Central	Clusia	Clusiaceae	Malpighiales	y	0			14271	LC	LC	0
1236	Cnidoscolus aconitifolius	Mexico Southeast	Cnidoscolus	Euphorbiaceae	Malpighiales	n	0			10076	LC	LC	0
1237	Cnidoscolus bahianus	Brazil West-Central	Cnidoscolus	Euphorbiaceae	Malpighiales	n	0			14154	LC	LC	0
1238	Cnidoscolus froesii	Brazil West-Central	Cnidoscolus	Euphorbiaceae	Malpighiales	n	0			386	LC	LC	0
1239	Cnidoscolus multilobus	Mexico Southeast	Cnidoscolus	Euphorbiaceae	Malpighiales	n	0			16656	LC	LC	0
1240	Cnidoscolus paucistamineus	Brazil West-Central	Cnidoscolus	Euphorbiaceae	Malpighiales	n	0			387	EN	UR	0
1241	Cnidoscolus pubescens	Brazil West-Central	Cnidoscolus	Euphorbiaceae	Malpighiales	n	0			12373	LC	LC	0
1242	Cnidoscolus quercifolius	Brazil West-Central	Cnidoscolus	Euphorbiaceae	Malpighiales	n	0			14144	LC	LC	0
1243	Cnidoscolus vitifolius	Brazil West-Central	Cnidoscolus	Euphorbiaceae	Malpighiales	n	0			388	LC	LC	0
1244	Coccoloba acapulcensis	Mexico Southeast	Coccoloba	Polygonaceae	Caryophyllales	y	0			16629	LC	LC	0
1245	Coccoloba argentinensis	Brazil West-Central	Coccoloba	Polygonaceae	Caryophyllales	y	0			389	LC	LC	0
1246	Coccoloba argentinensis	Brazil South	Coccoloba	Polygonaceae	Caryophyllales	y	0			389	LC	LC	0
1247	Coccoloba barbadensis	Mexico Southeast	Coccoloba	Polygonaceae	Caryophyllales	y	0			16262	LC	LC	0
1248	Coccoloba belizensis	Mexico Southeast	Coccoloba	Polygonaceae	Caryophyllales	y	0			16263	LC	LC	0
1249	Coccoloba caracasana	Mexico Southeast	Coccoloba	Polygonaceae	Caryophyllales	y	0			390	LC	LC	0
1250	Coccoloba chiapensis	Mexico Southeast	Coccoloba	Polygonaceae	Caryophyllales	y	0			391	EN	UR	0
1251	Coccoloba cordata	Brazil South	Coccoloba	Polygonaceae	Caryophyllales	y	0			392	LC	LC	0
1252	Coccoloba coronata	Brazil West-Central	Coccoloba	Polygonaceae	Caryophyllales	y	0			4497	LC	LC	0
1253	Coccoloba cozumelensis	Mexico Southeast	Coccoloba	Polygonaceae	Caryophyllales	y	0			16615	LC	LC	0
1254	Coccoloba cujabensis	Brazil West-Central	Coccoloba	Polygonaceae	Caryophyllales	y	0			393	LC	LC	0
1255	Coccoloba declinata	Brazil West-Central	Coccoloba	Polygonaceae	Caryophyllales	y	0			3092	LC	LC	0
1256	Coccoloba densifrons	Brazil West-Central	Coccoloba	Polygonaceae	Caryophyllales	y	0			9013	LC	LC	0
1257	Coccoloba diversifolia	Mexico Southeast	Coccoloba	Polygonaceae	Caryophyllales	y	0			14338	LC	LC	0
1258	Coccoloba escuintlensis	Mexico Southeast	Coccoloba	Polygonaceae	Caryophyllales	y	0			394	LC	LC	0
1259	Coccoloba excelsa	Brazil West-Central	Coccoloba	Polygonaceae	Caryophyllales	y	0			2043	LC	LC	0
1260	Coccoloba floribunda	Mexico Southeast	Coccoloba	Polygonaceae	Caryophyllales	y	0			17832	LC	LC	0
1261	Coccoloba glaziovii	Brazil South	Coccoloba	Polygonaceae	Caryophyllales	y	0			11933	LC	LC	0
1262	Coccoloba guaranitica	Brazil West-Central	Coccoloba	Polygonaceae	Caryophyllales	y	0			395	LC	LC	0
1263	Coccoloba hondurensis	Mexico Southeast	Coccoloba	Polygonaceae	Caryophyllales	y	0			16300	LC	LC	0
1264	Coccoloba humboldtii	Mexico Southeast	Coccoloba	Polygonaceae	Caryophyllales	y	0			16616	LC	LC	0
1265	Coccoloba latifolia	Brazil West-Central	Coccoloba	Polygonaceae	Caryophyllales	y	0			396	LC	LC	0
1266	Coccoloba liebmannii	Mexico Southeast	Coccoloba	Polygonaceae	Caryophyllales	y	0			397	LC	LC	0
1267	Coccoloba lindaviana	Mexico Southeast	Coccoloba	Polygonaceae	Caryophyllales	y	0			18700	CR	UR	0
1268	Coccoloba lucidula	Brazil West-Central	Coccoloba	Polygonaceae	Caryophyllales	y	0			398	LC	LC	0
1269	Coccoloba marginata	Brazil West-Central	Coccoloba	Polygonaceae	Caryophyllales	y	0			399	LC	LC	0
1270	Coccoloba mollis	Brazil West-Central	Coccoloba	Polygonaceae	Caryophyllales	y	0			9851	LC	LC	0
1271	Coccoloba montana	Mexico Southeast	Coccoloba	Polygonaceae	Caryophyllales	y	0			400	LC	LC	0
1272	Coccoloba obtusifolia	Brazil West-Central	Coccoloba	Polygonaceae	Caryophyllales	y	0			401	LC	LC	0
1273	Coccoloba ortizii	Mexico Southeast	Coccoloba	Polygonaceae	Caryophyllales	y	0			19908	EN	UR	0
1274	Coccoloba ovata	Brazil West-Central	Coccoloba	Polygonaceae	Caryophyllales	y	0			1946	LC	LC	0
1275	Coccoloba paraguariensis	Brazil West-Central	Coccoloba	Polygonaceae	Caryophyllales	y	0			402	LC	LC	0
1276	Coccoloba persicaria	Brazil South	Coccoloba	Polygonaceae	Caryophyllales	y	0			403	LC	LC	0
1277	Coccoloba reflexiflora	Mexico Southeast	Coccoloba	Polygonaceae	Caryophyllales	y	0			404	LC	LC	0
1278	Coccoloba salicifolia	Brazil West-Central	Coccoloba	Polygonaceae	Caryophyllales	y	0			405	LC	LC	0
1279	Coccoloba spicata	Mexico Southeast	Coccoloba	Polygonaceae	Caryophyllales	y	0			16693	LC	LC	0
1280	Coccoloba swartzii	Mexico Southeast	Coccoloba	Polygonaceae	Caryophyllales	y	0			406	LC	LC	0
1281	Coccoloba tuerckheimii	Mexico Southeast	Coccoloba	Polygonaceae	Caryophyllales	y	0			16571	LC	LC	0
1282	Coccoloba tunii	Mexico Southeast	Coccoloba	Polygonaceae	Caryophyllales	y	0			407	EN	UR	0
1283	Coccoloba uvifera	Mexico Southeast	Coccoloba	Polygonaceae	Caryophyllales	y	0			6813	LC	LC	0
1284	Coccoloba venosa	Mexico Southeast	Coccoloba	Polygonaceae	Caryophyllales	y	0			408	LC	LC	0
1285	Coccoloba warmingii	Brazil South	Coccoloba	Polygonaceae	Caryophyllales	y	0			12106	LC	LC	0
1286	Coccothrinax argentata	Mexico Southeast	Coccothrinax	Arecaceae	Arecales	y	0			14458	LC	LC	0
1287	Cochlospermum orinocense	Brazil West-Central	Cochlospermum	Bixaceae	Malvales	n	0			9111	LC	LC	0
1288	Cochlospermum vitifolium	Brazil West-Central	Cochlospermum	Bixaceae	Malvales	n	0			3905	LC	LC	0
1289	Cochlospermum vitifolium	Mexico Southeast	Cochlospermum	Bixaceae	Malvales	n	0			3905	LC	LC	0
1290	Cocos nucifera	Mexico Southeast	Cocos	Arecaceae	Arecales	y	0			409	LC	LC	0
1291	Cojoba arborea	Mexico Southeast	Cojoba	Fabaceae	Fabales	n	0			4791	LC	LC	0
1292	Cojoba escuintlensis	Mexico Southeast	Cojoba	Fabaceae	Fabales	n	0			410	EN	UR	0
1293	Cojoba graciliflora	Mexico Southeast	Cojoba	Fabaceae	Fabales	n	0			16264	LC	LC	0
1294	Cojoba haematoloba	Mexico Southeast	Cojoba	Fabaceae	Fabales	n	0			411	CR	UR	0
1295	Cojoba mariaelenae	Mexico Southeast	Cojoba	Fabaceae	Fabales	n	0			412	VU	UR	0
1296	Cojoba matudae	Mexico Southeast	Cojoba	Fabaceae	Fabales	n	0			413	VU	UR	0
1297	Cojoba sophorocarpa	Mexico Southeast	Cojoba	Fabaceae	Fabales	n	0			17542	LC	LC	0
1298	Colletia hystrix	Chile Central	Colletia	Rhamnaceae	Rosales	y	0			414	LC	LC	0
1299	Colletia paradoxa	Brazil South	Colletia	Rhamnaceae	Rosales	y	0			415	LC	LC	0
1300	Colubrina arborescens	Mexico Southeast	Colubrina	Rhamnaceae	Rosales	y	0			9607	LC	LC	0
1301	Colubrina elliptica	Mexico Southeast	Colubrina	Rhamnaceae	Rosales	y	0			14472	LC	LC	0
1302	Colubrina glandulosa	Brazil West-Central	Colubrina	Rhamnaceae	Rosales	y	0			14291	LC	LC	0
1303	Colubrina glandulosa	Brazil South	Colubrina	Rhamnaceae	Rosales	y	0			14291	LC	LC	0
1304	Colubrina greggii	Mexico Southeast	Colubrina	Rhamnaceae	Rosales	y	0			18688	LC	LC	0
1305	Colubrina heteroneura	Mexico Southeast	Colubrina	Rhamnaceae	Rosales	y	0			14676	LC	LC	0
1306	Colubrina retusa	Brazil West-Central	Colubrina	Rhamnaceae	Rosales	y	0			416	LC	LC	0
1307	Colubrina retusa	Brazil South	Colubrina	Rhamnaceae	Rosales	y	0			416	LC	LC	0
1308	Colubrina triflora	Mexico Southeast	Colubrina	Rhamnaceae	Rosales	y	0			17961	LC	LC	0
1309	Comarostaphylis discolor	Mexico Southeast	Comarostaphylis	Ericaceae	Ericales	y	0			417	LC	LC	0
1310	Combretum duarteanum	Brazil West-Central	Combretum	Combretaceae	Myrtales	n	0			418	LC	LC	0
1311	Combretum glaucocarpum	Brazil West-Central	Combretum	Combretaceae	Myrtales	n	0			2069	LC	LC	0
1312	Combretum leprosum	Brazil West-Central	Combretum	Combretaceae	Myrtales	n	0			5032	LC	LC	0
1313	Combretum mellifluum	Brazil West-Central	Combretum	Combretaceae	Myrtales	n	0			419	LC	LC	0
1314	Combretum monetaria	Brazil West-Central	Combretum	Combretaceae	Myrtales	n	0			420	LC	LC	0
1315	Commiphora leptophloeos	Brazil West-Central	Commiphora	Burseraceae	Sapindales	y	0			5033	LC	LC	0
1316	Comocladia guatemalensis	Mexico Southeast	Comocladia	Anacardiaceae	Sapindales	y	0			421	LC	LC	0
1317	Comocladia macrophylla	Mexico Southeast	Comocladia	Anacardiaceae	Sapindales	y	0			422	LC	LC	0
1318	Compsoneura mexicana	Mexico Southeast	Compsoneura	Myristicaceae	Magnoliales	y	0			16303	LC	LC	0
1319	Compsoneura sprucei	Mexico Southeast	Compsoneura	Myristicaceae	Magnoliales	y	0			9211	LC	LC	0
1320	Compsoneura ulei	Brazil West-Central	Compsoneura	Myristicaceae	Magnoliales	y	0			12071	LC	LC	0
1321	Conceveiba guianensis	Brazil West-Central	Conceveiba	Euphorbiaceae	Malpighiales	n	0			423	LC	LC	0
1322	Conceveiba martiana	Brazil West-Central	Conceveiba	Euphorbiaceae	Malpighiales	n	0			2304	LC	LC	0
1323	Conchocarpus pentandrus	Brazil South	Conchocarpus	Rutaceae	Sapindales	n	0			424	LC	LC	0
1324	Conchocarpus rubrus	Brazil South	Conchocarpus	Rutaceae	Sapindales	n	0			425	LC	LC	0
1325	Condalia buxifolia	Brazil South	Condalia	Rhamnaceae	Rosales	y	0			426	LC	LC	0
1326	Condaminea corymbosa	Brazil West-Central	Condaminea	Rubiaceae	Gentianales	y	0			16551	LC	LC	0
1327	Connarus erianthus	Brazil West-Central	Connarus	Connaraceae	Oxalidales	n	0			5784	LC	LC	0
1328	Connarus martii	Brazil West-Central	Connarus	Connaraceae	Oxalidales	n	0			427	LC	LC	0
1329	Connarus perrottetii	Brazil West-Central	Connarus	Connaraceae	Oxalidales	n	0			2821	LC	LC	0
1330	Connarus rostratus	Brazil South	Connarus	Connaraceae	Oxalidales	n	0			428	LC	LC	0
1331	Connarus suberosus	Brazil West-Central	Connarus	Connaraceae	Oxalidales	n	0			7546	LC	LC	0
1332	Conocarpus erectus	Mexico Southeast	Conocarpus	Combretaceae	Myrtales	y	0			4516	LC	LC	0
1333	Conocarpus erectus	Brazil South	Conocarpus	Combretaceae	Myrtales	y	0			4516	LC	LC	0
1334	Conostegia icosandra	Mexico Southeast	Conostegia	Melastomataceae	Myrtales	y	0			429	LC	LC	0
1335	Conostegia montana	Mexico Southeast	Conostegia	Melastomataceae	Myrtales	y	0			14553	LC	LC	0
1336	Conostegia plumosa	Mexico Southeast	Conostegia	Melastomataceae	Myrtales	y	0			430	LC	LC	0
1337	Conostegia superba	Mexico Southeast	Conostegia	Melastomataceae	Myrtales	y	0			6239	VU	UR	0
1338	Conostegia volcanalis	Mexico Southeast	Conostegia	Melastomataceae	Myrtales	y	0			18092	LC	LC	0
1339	Conostegia xalapensis	Mexico Southeast	Conostegia	Melastomataceae	Myrtales	y	0			14554	LC	LC	0
1340	Copaifera duckei	Brazil West-Central	Copaifera	Fabaceae	Fabales	n	0			431	LC	LC	0
1341	Copaifera elliptica	Brazil West-Central	Copaifera	Fabaceae	Fabales	n	0			432	LC	LC	0
1342	Copaifera glycycarpa	Brazil West-Central	Copaifera	Fabaceae	Fabales	n	0			4138	LC	LC	0
1343	Copaifera langsdorffii	Brazil South	Copaifera	Fabaceae	Fabales	n	0			2145	LC	LC	0
1344	Copaifera langsdorffii	Brazil West-Central	Copaifera	Fabaceae	Fabales	n	0			2145	LC	LC	0
1345	Copaifera luetzelburgii	Brazil West-Central	Copaifera	Fabaceae	Fabales	n	0			14248	LC	LC	0
1346	Copaifera magnifolia	Brazil West-Central	Copaifera	Fabaceae	Fabales	n	0			433	LC	LC	0
1347	Copaifera malmei	Brazil West-Central	Copaifera	Fabaceae	Fabales	n	0			434	LC	LC	0
1348	Copaifera multijuga	Brazil West-Central	Copaifera	Fabaceae	Fabales	n	0			2809	LC	LC	0
1349	Copaifera oblongifolia	Brazil West-Central	Copaifera	Fabaceae	Fabales	n	0			15933	LC	LC	0
1350	Copaifera piresii	Brazil West-Central	Copaifera	Fabaceae	Fabales	n	0			4393	LC	LC	0
1351	Copaifera reticulata	Brazil West-Central	Copaifera	Fabaceae	Fabales	n	0			9874	LC	LC	0
1352	Copaifera trapezifolia	Brazil South	Copaifera	Fabaceae	Fabales	n	0			11173	LC	LC	0
1353	Copernicia alba	Brazil West-Central	Copernicia	Arecaceae	Arecales	y	0			5000	LC	LC	0
1354	Copernicia prunifera	Brazil West-Central	Copernicia	Arecaceae	Arecales	y	0			435	LC	LC	0
1355	Cordia alliodora	Brazil West-Central	Cordia	Cordiaceae	Boraginales	y	0			9882	LC	LC	0
1356	Cordia alliodora	Mexico Southeast	Cordia	Cordiaceae	Boraginales	y	0			9882	LC	LC	0
1357	Cordia americana	Brazil South	Cordia	Cordiaceae	Boraginales	y	0			436	LC	LC	0
1358	Cordia americana	Brazil West-Central	Cordia	Cordiaceae	Boraginales	y	0			436	LC	LC	0
1359	Cordia anabaptista	Brazil West-Central	Cordia	Cordiaceae	Boraginales	y	0			7523	LC	LC	0
1360	Cordia bicolor	Brazil West-Central	Cordia	Cordiaceae	Boraginales	y	0			14302	LC	LC	0
1361	Cordia bicolor	Mexico Southeast	Cordia	Cordiaceae	Boraginales	y	0			14302	LC	LC	0
1362	Cordia brasiliensis	Brazil West-Central	Cordia	Cordiaceae	Boraginales	y	0			16060	LC	LC	0
1363	Cordia collococca	Mexico Southeast	Cordia	Cordiaceae	Boraginales	y	0			3182	LC	LC	0
1364	Cordia decandra	Chile Central	Cordia	Cordiaceae	Boraginales	y	0			437	LC	LC	0
1365	Cordia dentata	Mexico Southeast	Cordia	Cordiaceae	Boraginales	y	0			8677	LC	LC	0
1366	Cordia diversifolia	Mexico Southeast	Cordia	Cordiaceae	Boraginales	y	0			16422	LC	LC	0
1367	Cordia dodecandra	Mexico Southeast	Cordia	Cordiaceae	Boraginales	y	0			438	LC	LC	0
1368	Cordia ecalyculata	Brazil South	Cordia	Cordiaceae	Boraginales	y	0			439	LC	LC	0
1369	Cordia ecalyculata	Brazil West-Central	Cordia	Cordiaceae	Boraginales	y	0			439	LC	LC	0
1370	Cordia elaeagnoides	Mexico Southeast	Cordia	Cordiaceae	Boraginales	y	0			18684	LC	LC	0
1371	Cordia exaltata	Brazil West-Central	Cordia	Cordiaceae	Boraginales	y	0			9891	LC	LC	0
1372	Cordia fallax	Brazil West-Central	Cordia	Cordiaceae	Boraginales	y	0			440	LC	LC	0
1373	Cordia gerascanthus	Mexico Southeast	Cordia	Cordiaceae	Boraginales	y	0			441	LC	LC	0
1374	Cordia glabrata	Brazil West-Central	Cordia	Cordiaceae	Boraginales	y	0			442	LC	LC	0
1375	Cordia glazioviana	Brazil West-Central	Cordia	Cordiaceae	Boraginales	y	0			443	LC	LC	0
1376	Cordia goeldiana	Brazil West-Central	Cordia	Cordiaceae	Boraginales	y	0			444	LC	LC	0
1377	Cordia insignis	Brazil West-Central	Cordia	Cordiaceae	Boraginales	y	0			15969	LC	LC	0
1378	Cordia lomatoloba	Brazil West-Central	Cordia	Cordiaceae	Boraginales	y	0			12632	LC	LC	0
1379	Cordia magnoliifolia	Brazil South	Cordia	Cordiaceae	Boraginales	y	0			11863	LC	LC	0
1380	Cordia nodosa	Brazil West-Central	Cordia	Cordiaceae	Boraginales	y	0			9810	LC	LC	0
1381	Cordia oaxacana	Mexico Southeast	Cordia	Cordiaceae	Boraginales	y	0			445	LC	LC	0
1382	Cordia panamensis	Mexico Southeast	Cordia	Cordiaceae	Boraginales	y	0			4778	LC	LC	0
1383	Cordia panicularis	Brazil West-Central	Cordia	Cordiaceae	Boraginales	y	0			446	LC	LC	0
1384	Cordia prunifolia	Mexico Southeast	Cordia	Cordiaceae	Boraginales	y	0			18656	LC	LC	0
1385	Cordia rufescens	Brazil West-Central	Cordia	Cordiaceae	Boraginales	y	0			11669	LC	LC	0
1386	Cordia sagotii	Brazil West-Central	Cordia	Cordiaceae	Boraginales	y	0			2215	LC	LC	0
1387	Cordia scabrifolia	Brazil West-Central	Cordia	Cordiaceae	Boraginales	y	0			9917	LC	LC	0
1388	Cordia sebestena	Mexico Southeast	Cordia	Cordiaceae	Boraginales	y	0			14392	LC	LC	0
1389	Cordia sellowiana	Brazil West-Central	Cordia	Cordiaceae	Boraginales	y	0			9911	LC	LC	0
1390	Cordia sellowiana	Brazil South	Cordia	Cordiaceae	Boraginales	y	0			9911	LC	LC	0
1391	Cordia sericicalyx	Brazil West-Central	Cordia	Cordiaceae	Boraginales	y	0			13495	LC	LC	0
1392	Cordia silvestris	Brazil South	Cordia	Cordiaceae	Boraginales	y	0			447	LC	LC	0
1393	Cordia stellifera	Mexico Southeast	Cordia	Cordiaceae	Boraginales	y	0			16304	LC	LC	0
1394	Cordia stenoclada	Mexico Southeast	Cordia	Cordiaceae	Boraginales	y	0			18657	LC	LC	0
1395	Cordia superba	Brazil South	Cordia	Cordiaceae	Boraginales	y	0			7472	LC	LC	0
1396	Cordia superba	Brazil West-Central	Cordia	Cordiaceae	Boraginales	y	0			7472	LC	LC	0
1397	Cordia taguahyensis	Brazil West-Central	Cordia	Cordiaceae	Boraginales	y	0			7524	LC	LC	0
1398	Cordia tarodae	Brazil South	Cordia	Cordiaceae	Boraginales	y	0			13781	NT	LC	0
1399	Cordia tetrandra	Brazil West-Central	Cordia	Cordiaceae	Boraginales	y	0			9922	LC	LC	0
1400	Cordia toqueve	Brazil West-Central	Cordia	Cordiaceae	Boraginales	y	0			9932	LC	LC	0
1401	Cordia trichotoma	Brazil South	Cordia	Cordiaceae	Boraginales	y	0			5083	LC	LC	0
1402	Cordia trichotoma	Brazil West-Central	Cordia	Cordiaceae	Boraginales	y	0			5083	LC	LC	0
1403	Cordia ucayaliensis	Brazil West-Central	Cordia	Cordiaceae	Boraginales	y	0			12641	LC	LC	0
1404	Cordia ulei	Brazil West-Central	Cordia	Cordiaceae	Boraginales	y	0			448	LC	LC	0
1405	Cordiera concolor	Brazil South	Cordiera	Rubiaceae	Gentianales	y	0			449	LC	LC	0
1406	Cordiera concolor	Brazil West-Central	Cordiera	Rubiaceae	Gentianales	y	0			449	LC	LC	0
1407	Cordiera elliptica	Brazil West-Central	Cordiera	Rubiaceae	Gentianales	y	0			450	LC	LC	0
1408	Cordiera hadrantha	Brazil West-Central	Cordiera	Rubiaceae	Gentianales	y	0			451	LC	LC	0
1409	Cordiera macrophylla	Brazil West-Central	Cordiera	Rubiaceae	Gentianales	y	0			452	LC	LC	0
1410	Cordiera myrciifolia	Brazil West-Central	Cordiera	Rubiaceae	Gentianales	y	0			16562	LC	LC	0
1411	Cordiera myrciifolia	Brazil South	Cordiera	Rubiaceae	Gentianales	y	0			16562	LC	LC	0
1412	Cordiera rigida	Brazil West-Central	Cordiera	Rubiaceae	Gentianales	y	0			453	LC	LC	0
1413	Cordiera sessilis	Brazil West-Central	Cordiera	Rubiaceae	Gentianales	y	0			454	LC	LC	0
1414	Cordiera sessilis	Brazil South	Cordiera	Rubiaceae	Gentianales	y	0			454	LC	LC	0
1415	Cordiera triflora	Brazil West-Central	Cordiera	Rubiaceae	Gentianales	y	0			13513	LC	LC	0
1416	Cordiera vinosa	Brazil West-Central	Cordiera	Rubiaceae	Gentianales	y	0			455	LC	LC	0
1417	Cordyline spectabilis	Brazil South	Cordyline	Asparagaceae	Asparagales	n	0			456	LC	LC	0
1418	Cordyline spectabilis	Brazil West-Central	Cordyline	Asparagaceae	Asparagales	n	0			456	LC	LC	0
1419	Cornus disciflora	Mexico Southeast	Cornus	Cornaceae	Cornales	y	0			18228	LC	LC	0
1420	Cornus excelsa	Mexico Southeast	Cornus	Cornaceae	Cornales	y	0			18875	LC	LC	0
1421	Cornutia pyramidata	Mexico Southeast	Cornutia	Lamiaceae	Lamiales	y	0			5132	LC	LC	0
1422	Corynabutilon vitifolium	Chile Central	Corynabutilon	Malvaceae	Malvales	n	0			457	LC	LC	0
1423	Cosmibuena matudae	Mexico Southeast	Cosmibuena	Rubiaceae	Gentianales	n	0			458	LC	LC	0
1424	Cosmocalyx spectabilis	Mexico Southeast	Cosmocalyx	Rubiaceae	Gentianales	n	0			16339	VU	UR	0
1425	Couepia bracteosa	Brazil West-Central	Couepia	Chrysobalanaceae	Malpighiales	y	1		4.5	459	LC	LC	1
1426	Couepia grandiflora	Brazil West-Central	Couepia	Chrysobalanaceae	Malpighiales	y	0			460	LC	LC	0
1427	Couepia grandiflora	Brazil South	Couepia	Chrysobalanaceae	Malpighiales	y	0			460	LC	LC	0
1428	Couepia guianensis	Brazil West-Central	Couepia	Chrysobalanaceae	Malpighiales	y	0			2412	LC	LC	0
1429	Couepia paraensis	Brazil West-Central	Couepia	Chrysobalanaceae	Malpighiales	y	0			17452	LC	LC	0
1430	Couepia polyandra	Mexico Southeast	Couepia	Chrysobalanaceae	Malpighiales	y	1	4.5	2.4	461	LC	LC	1
1431	Couepia uiti	Brazil West-Central	Couepia	Chrysobalanaceae	Malpighiales	y	0			462	LC	LC	0
1432	Couma guianensis	Brazil West-Central	Couma	Apocynaceae	Gentianales	y	0			463	LC	LC	0
1433	Couma macrocarpa	Brazil West-Central	Couma	Apocynaceae	Gentianales	y	0			5812	LC	LC	0
1434	Couma utilis	Brazil West-Central	Couma	Apocynaceae	Gentianales	y	0			464	LC	LC	0
1435	Couratari guianensis	Brazil West-Central	Couratari	Lecythidaceae	Ericales	n	0			2216	VU	UR	0
1436	Couratari macrosperma	Brazil West-Central	Couratari	Lecythidaceae	Ericales	n	0			465	LC	LC	0
1437	Couratari multiflora	Brazil West-Central	Couratari	Lecythidaceae	Ericales	n	0			2913	LC	LC	0
1438	Couratari stellata	Brazil West-Central	Couratari	Lecythidaceae	Ericales	n	0			466	LC	LC	0
1439	Couratari tenuicarpa	Brazil West-Central	Couratari	Lecythidaceae	Ericales	n	0			467	LC	LC	0
1440	Coursetia hassleri	Brazil West-Central	Coursetia	Fabaceae	Fabales	n	0			468	LC	LC	0
1441	Coussapoa asperifolia	Brazil West-Central	Coussapoa	Urticaceae	Rosales	y	0			10311	LC	LC	0
1442	Coussapoa latifolia	Brazil West-Central	Coussapoa	Urticaceae	Rosales	y	0			8251	LC	LC	0
1443	Coussapoa microcarpa	Brazil South	Coussapoa	Urticaceae	Rosales	y	0			11178	LC	LC	0
1444	Coussapoa oligocephala	Mexico Southeast	Coussapoa	Urticaceae	Rosales	y	0			16340	VU	UR	0
1445	Coussapoa purpusii	Mexico Southeast	Coussapoa	Urticaceae	Rosales	y	0			18724	VU	UR	0
1446	Coussapoa scabra	Brazil West-Central	Coussapoa	Urticaceae	Rosales	y	0			469	LC	LC	0
1447	Coussapoa trinervia	Brazil West-Central	Coussapoa	Urticaceae	Rosales	y	0			17472	LC	LC	0
1448	Coussapoa villosa	Brazil West-Central	Coussapoa	Urticaceae	Rosales	y	0			8261	LC	LC	0
1449	Coussarea contracta	Brazil South	Coussarea	Rubiaceae	Gentianales	y	0			470	LC	LC	0
1450	Coussarea contracta	Brazil West-Central	Coussarea	Rubiaceae	Gentianales	y	0			470	LC	LC	0
1451	Coussarea frondosa	Brazil West-Central	Coussarea	Rubiaceae	Gentianales	y	0			471	CR	UR	0
1452	Coussarea hirticalyx	Brazil West-Central	Coussarea	Rubiaceae	Gentianales	y	0			15271	LC	LC	0
1453	Coussarea hydrangeifolia	Brazil South	Coussarea	Rubiaceae	Gentianales	y	0			472	LC	LC	0
1454	Coussarea hydrangeifolia	Brazil West-Central	Coussarea	Rubiaceae	Gentianales	y	0			472	LC	LC	0
1455	Coussarea leptoloba	Brazil West-Central	Coussarea	Rubiaceae	Gentianales	y	0			473	LC	LC	0
1456	Coussarea machadoana	Brazil West-Central	Coussarea	Rubiaceae	Gentianales	y	0			17482	VU	UR	0
1457	Coussarea paniculata	Brazil West-Central	Coussarea	Rubiaceae	Gentianales	y	0			12103	LC	LC	0
1458	Coussarea platyphylla	Brazil West-Central	Coussarea	Rubiaceae	Gentianales	y	0			474	LC	LC	0
1459	Coussarea platyphylla	Brazil South	Coussarea	Rubiaceae	Gentianales	y	0			474	LC	LC	0
1460	Coutarea hexandra	Brazil South	Coutarea	Rubiaceae	Gentianales	n	0			2146	LC	LC	0
1461	Coutarea hexandra	Brazil West-Central	Coutarea	Rubiaceae	Gentianales	n	0			2146	LC	LC	0
1462	Coutarea hexandra	Mexico Southeast	Coutarea	Rubiaceae	Gentianales	n	0			2146	LC	LC	0
1463	Crataegus mexicana	Mexico Southeast	Crataegus	Rosaceae	Rosales	y	1	4	4	18229	LC	LC	1
1464	Crataegus rosei	Mexico Southeast	Crataegus	Rosaceae	Rosales	y	0			19573	LC	LC	0
1465	Crateva tapia	Mexico Southeast	Crateva	Capparaceae	Brassicales	y	2	4	3	17494	LC	LC	1
1466	Crateva tapia	Brazil West-Central	Crateva	Capparaceae	Brassicales	y	2	4	3	17494	LC	LC	1
1467	Cremastosperma monospermum	Brazil West-Central	Cremastosperma	Annonaceae	Magnoliales	y	0			5852	LC	LC	0
1468	Crepidospermum goudotianum	Brazil West-Central	Crepidospermum	Burseraceae	Sapindales	y	0			475	LC	LC	0
1469	Crepidospermum rhoifolium	Brazil West-Central	Crepidospermum	Burseraceae	Sapindales	y	0			476	LC	LC	0
1470	Crescentia alata	Mexico Southeast	Crescentia	Bignoniaceae	Lamiales	y	2	15	15	17962	LC	LC	1
1471	Crescentia cujete	Mexico Southeast	Crescentia	Bignoniaceae	Lamiales	y	2	22	17	5084	LC	LC	1
1472	Crescentia linearifolia	Mexico Southeast	Crescentia	Bignoniaceae	Lamiales	y	3	4	3	477	LC	LC	1
1473	Crinodendron brasiliense	Brazil South	Crinodendron	Elaeocarpaceae	Oxalidales	n	0			14086	EN	UR	0
1474	Crinodendron hookerianum	Chile Central	Crinodendron	Elaeocarpaceae	Oxalidales	n	0			478	EN	UR	0
1475	Crinodendron patagua	Chile Central	Crinodendron	Elaeocarpaceae	Oxalidales	n	0			479	LC	LC	0
1476	Critonia daleoides	Mexico Southeast	Critonia	Asteraceae	Asterales	n	0			16477	LC	LC	0
1477	Critonia hebebotrya	Mexico Southeast	Critonia	Asteraceae	Asterales	n	0			480	LC	LC	0
1478	Critoniadelphus microdon	Mexico Southeast	Critoniadelphus	Asteraceae	Asterales	n	0			481	EN	UR	0
1479	Critoniadelphus nubigenus	Mexico Southeast	Critoniadelphus	Asteraceae	Asterales	n	0			482	LC	LC	0
1480	Critoniopsis quinqueflora	Brazil South	Critoniopsis	Asteraceae	Asterales	n	0			13730	LC	LC	0
1481	Critoniopsis salicifolia	Mexico Southeast	Critoniopsis	Asteraceae	Asterales	n	0			483	LC	LC	0
1482	Crossopetalum filipes	Mexico Southeast	Crossopetalum	Celastraceae	Celastrales	y	0			484	LC	LC	0
1483	Crossopetalum parviflorum	Mexico Southeast	Crossopetalum	Celastraceae	Celastrales	y	0			16305	LC	LC	0
1484	Crossopetalum rhacoma	Mexico Southeast	Crossopetalum	Celastraceae	Celastrales	y	0			14341	LC	LC	0
1485	Croton arboreus	Mexico Southeast	Croton	Euphorbiaceae	Malpighiales	n	0			16266	LC	LC	0
1486	Croton axillaris	Mexico Southeast	Croton	Euphorbiaceae	Malpighiales	n	0			17963	LC	LC	0
1487	Croton billbergianus	Mexico Southeast	Croton	Euphorbiaceae	Malpighiales	n	0			16306	LC	LC	0
1488	Croton cajucara	Brazil West-Central	Croton	Euphorbiaceae	Malpighiales	n	0			2810	LC	LC	0
1489	Croton celtidifolius	Brazil South	Croton	Euphorbiaceae	Malpighiales	n	0			13161	LC	LC	0
1490	Croton compressus	Brazil South	Croton	Euphorbiaceae	Malpighiales	n	0			485	LC	LC	0
1491	Croton confinis	Brazil South	Croton	Euphorbiaceae	Malpighiales	n	0			486	EN	UR	0
1492	Croton cuneatus	Brazil West-Central	Croton	Euphorbiaceae	Malpighiales	n	0			17082	LC	LC	0
1493	Croton draco	Mexico Southeast	Croton	Euphorbiaceae	Malpighiales	n	0			17224	LC	LC	0
1494	Croton flavescens	Mexico Southeast	Croton	Euphorbiaceae	Malpighiales	n	0			487	LC	LC	0
1495	Croton floribundus	Brazil South	Croton	Euphorbiaceae	Malpighiales	n	0			488	LC	LC	0
1496	Croton floribundus	Brazil West-Central	Croton	Euphorbiaceae	Malpighiales	n	0			488	LC	LC	0
1497	Croton fragilis	Mexico Southeast	Croton	Euphorbiaceae	Malpighiales	n	0			489	LC	LC	0
1498	Croton glabellus	Mexico Southeast	Croton	Euphorbiaceae	Malpighiales	n	0			14489	LC	LC	0
1499	Croton gossypiifolius	Mexico Southeast	Croton	Euphorbiaceae	Malpighiales	n	0			4758	LC	LC	0
1500	Croton guatemalensis	Mexico Southeast	Croton	Euphorbiaceae	Malpighiales	n	0			490	LC	LC	0
1501	Croton icche	Mexico Southeast	Croton	Euphorbiaceae	Malpighiales	n	0			16478	LC	LC	0
1502	Croton macrobothrys	Brazil South	Croton	Euphorbiaceae	Malpighiales	n	0			11824	LC	LC	0
1503	Croton matourensis	Brazil West-Central	Croton	Euphorbiaceae	Malpighiales	n	0			15291	LC	LC	0
1504	Croton mexicanus	Mexico Southeast	Croton	Euphorbiaceae	Malpighiales	n	0			491	LC	LC	0
1505	Croton morifolius	Mexico Southeast	Croton	Euphorbiaceae	Malpighiales	n	0			492	LC	LC	0
1506	Croton nitens	Mexico Southeast	Croton	Euphorbiaceae	Malpighiales	n	0			493	LC	LC	0
1507	Croton niveus	Mexico Southeast	Croton	Euphorbiaceae	Malpighiales	n	0			8235	LC	LC	0
1508	Croton oerstedianus	Mexico Southeast	Croton	Euphorbiaceae	Malpighiales	n	0			16423	LC	LC	0
1509	Croton palanostigma	Brazil West-Central	Croton	Euphorbiaceae	Malpighiales	n	0			16572	LC	LC	0
1510	Croton piptocalyx	Brazil West-Central	Croton	Euphorbiaceae	Malpighiales	n	0			12007	LC	LC	0
1511	Croton pseudoniveus	Mexico Southeast	Croton	Euphorbiaceae	Malpighiales	n	0			18445	LC	LC	0
1512	Croton reflexifolius	Mexico Southeast	Croton	Euphorbiaceae	Malpighiales	n	0			16671	LC	LC	0
1513	Croton salutaris	Brazil South	Croton	Euphorbiaceae	Malpighiales	n	0			13113	LC	LC	0
1514	Croton sampatik	Brazil West-Central	Croton	Euphorbiaceae	Malpighiales	n	0			494	LC	LC	0
1515	Croton schiedeanus	Mexico Southeast	Croton	Euphorbiaceae	Malpighiales	n	0			4708	LC	LC	0
1516	Croton spruceanus	Brazil West-Central	Croton	Euphorbiaceae	Malpighiales	n	0			495	LC	LC	0
1517	Croton tabascensis	Mexico Southeast	Croton	Euphorbiaceae	Malpighiales	n	0			496	EN	UR	0
1518	Croton urucurana	Brazil West-Central	Croton	Euphorbiaceae	Malpighiales	n	0			497	LC	LC	0
1519	Croton urucurana	Brazil South	Croton	Euphorbiaceae	Malpighiales	n	0			497	LC	LC	0
1520	Croton vulnerarius	Brazil South	Croton	Euphorbiaceae	Malpighiales	n	0			13356	LC	LC	0
1521	Croton xalapensis	Mexico Southeast	Croton	Euphorbiaceae	Malpighiales	n	0			16479	LC	LC	0
1522	Croton yavitensis	Brazil West-Central	Croton	Euphorbiaceae	Malpighiales	n	0			498	LC	LC	0
1523	Croton yucatanensis	Mexico Southeast	Croton	Euphorbiaceae	Malpighiales	n	0			499	LC	LC	0
1524	Cryosophila stauracantha	Mexico Southeast	Cryosophila	Arecaceae	Arecales	y	0			500	LC	LC	0
1525	Cryptocarya alba	Chile Central	Cryptocarya	Lauraceae	Laurales	y	0			16217	LC	LC	0
1526	Cryptocarya aschersoniana	Brazil South	Cryptocarya	Lauraceae	Laurales	y	0			11381	LC	LC	0
1527	Cryptocarya guianensis	Brazil West-Central	Cryptocarya	Lauraceae	Laurales	y	0			4216	LC	LC	0
1528	Cryptocarya mandioccana	Brazil South	Cryptocarya	Lauraceae	Laurales	y	0	3	3	11770	LC	LC	0
1529	Cryptocarya moschata	Brazil South	Cryptocarya	Lauraceae	Laurales	y	0	2.7	2.7	11231	LC	LC	0
1530	Cryptocarya moschata	Brazil West-Central	Cryptocarya	Lauraceae	Laurales	y	0	2.7	2.7	11231	LC	LC	0
1531	Ctenardisia purpusii	Mexico Southeast	Ctenardisia	Primulaceae	Ericales	n	0			501	EN	UR	0
1532	Cupania belizensis	Mexico Southeast	Cupania	Sapindaceae	Sapindales	n	0			16267	LC	LC	0
1533	Cupania castaneifolia	Brazil West-Central	Cupania	Sapindaceae	Sapindales	n	0			502	LC	LC	0
1534	Cupania cinerea	Brazil West-Central	Cupania	Sapindaceae	Sapindales	n	0			11371	LC	LC	0
1535	Cupania dentata	Mexico Southeast	Cupania	Sapindaceae	Sapindales	n	0			503	LC	LC	0
1536	Cupania diphylla	Brazil West-Central	Cupania	Sapindaceae	Sapindales	n	0			83110	LC	LC	0
1537	Cupania glabra	Mexico Southeast	Cupania	Sapindaceae	Sapindales	n	0			14804	LC	LC	0
1538	Cupania guatemalensis	Mexico Southeast	Cupania	Sapindaceae	Sapindales	n	0			16452	LC	LC	0
1539	Cupania hispida	Brazil West-Central	Cupania	Sapindaceae	Sapindales	n	0			2704	LC	LC	0
1540	Cupania juglandifolia	Mexico Southeast	Cupania	Sapindaceae	Sapindales	n	0			14721	LC	LC	0
1541	Cupania macrostylis	Brazil West-Central	Cupania	Sapindaceae	Sapindales	n	0			10710	LC	LC	0
1542	Cupania mollis	Mexico Southeast	Cupania	Sapindaceae	Sapindales	n	0			18430	LC	LC	0
1543	Cupania oblongifolia	Brazil South	Cupania	Sapindaceae	Sapindales	n	0			4635	LC	LC	0
1544	Cupania oblongifolia	Brazil West-Central	Cupania	Sapindaceae	Sapindales	n	0			4635	LC	LC	0
1545	Cupania platycarpa	Brazil West-Central	Cupania	Sapindaceae	Sapindales	n	0			504	LC	LC	0
1546	Cupania rubiginosa	Brazil West-Central	Cupania	Sapindaceae	Sapindales	n	0			15314	LC	LC	0
1547	Cupania rufescens	Mexico Southeast	Cupania	Sapindaceae	Sapindales	n	0			5588	LC	LC	0
1548	Cupania scrobiculata	Brazil West-Central	Cupania	Sapindaceae	Sapindales	n	0			10810	LC	LC	0
1549	Cupania scrobiculata	Mexico Southeast	Cupania	Sapindaceae	Sapindales	n	0			10810	LC	LC	0
1550	Cupania spectabilis	Mexico Southeast	Cupania	Sapindaceae	Sapindales	n	0			16308	EN	UR	0
1551	Cupania tenuivalvis	Brazil South	Cupania	Sapindaceae	Sapindales	n	0			13153	LC	LC	0
1552	Cupania tenuivalvis	Brazil West-Central	Cupania	Sapindaceae	Sapindales	n	0			13153	LC	LC	0
1553	Cupania vernalis	Brazil South	Cupania	Sapindaceae	Sapindales	n	0			4227	LC	LC	0
1554	Cupania vernalis	Brazil West-Central	Cupania	Sapindaceae	Sapindales	n	0			4227	LC	LC	0
1555	Cupania zanthoxyloides	Brazil South	Cupania	Sapindaceae	Sapindales	n	0			13265	LC	LC	0
1556	Cupressus benthamii	Mexico Southeast	Cupressus	Cupressaceae	Pinales	n	0			505	LC	LC	0
1557	Cupressus lusitanica	Mexico Southeast	Cupressus	Cupressaceae	Pinales	n	0			18537	LC	LC	0
1558	Curatella americana	Brazil West-Central	Curatella	Dilleniaceae	Dilleniales	n	0			4360	LC	LC	0
1559	Curatella americana	Brazil South	Curatella	Dilleniaceae	Dilleniales	n	0			4360	LC	LC	0
1560	Curatella americana	Mexico Southeast	Curatella	Dilleniaceae	Dilleniales	n	0			4360	LC	LC	0
1561	Curitiba prismatica	Brazil South	Curitiba	Myricaceae	Myrtales	y	0			13767	VU	UR	0
1562	Cyathea atrovirens	Brazil South	Cyathea	Cyatheaceae	Cyatheales	n	0			506	LC	LC	0
1563	Cyathea atrovirens	Brazil West-Central	Cyathea	Cyatheaceae	Cyatheales	n	0			506	LC	LC	0
1564	Cyathea bicrenata	Mexico Southeast	Cyathea	Cyatheaceae	Cyatheales	n	0			507	LC	LC	0
1565	Cyathea corcovadensis	Brazil South	Cyathea	Cyatheaceae	Cyatheales	n	0			508	LC	LC	0
1566	Cyathea costaricensis	Mexico Southeast	Cyathea	Cyatheaceae	Cyatheales	n	0			509	LC	LC	0
1567	Cyathea delgadii	Brazil South	Cyathea	Cyatheaceae	Cyatheales	n	0			510	LC	LC	0
1568	Cyathea delgadii	Brazil West-Central	Cyathea	Cyatheaceae	Cyatheales	n	0			510	LC	LC	0
1569	Cyathea divergens	Mexico Southeast	Cyathea	Cyatheaceae	Cyatheales	n	0			511	LC	LC	0
1570	Cyathea fulva	Mexico Southeast	Cyathea	Cyatheaceae	Cyatheales	n	0			512	LC	LC	0
1571	Cyathea gardneri	Brazil South	Cyathea	Cyatheaceae	Cyatheales	n	0			513	LC	LC	0
1572	Cyathea gardneri	Brazil West-Central	Cyathea	Cyatheaceae	Cyatheales	n	0			513	LC	LC	0
1573	Cyathea glaziovii	Brazil West-Central	Cyathea	Cyatheaceae	Cyatheales	n	0			514	LC	LC	0
1574	Cyathea hirsuta	Brazil South	Cyathea	Cyatheaceae	Cyatheales	n	0			515	LC	LC	0
1575	Cyathea leucofolis	Brazil South	Cyathea	Cyatheaceae	Cyatheales	n	0			516	LC	LC	0
1576	Cyathea microdonta	Brazil West-Central	Cyathea	Cyatheaceae	Cyatheales	n	0			517	LC	LC	0
1577	Cyathea microdonta	Mexico Southeast	Cyathea	Cyatheaceae	Cyatheales	n	0			517	LC	LC	0
1578	Cyathea phalerata	Brazil South	Cyathea	Cyatheaceae	Cyatheales	n	0			518	LC	LC	0
1579	Cyathea phalerata	Brazil West-Central	Cyathea	Cyatheaceae	Cyatheales	n	0			518	LC	LC	0
1580	Cyathea poeppigii	Brazil West-Central	Cyathea	Cyatheaceae	Cyatheales	n	0			519	LC	LC	0
1581	Cyathea pungens	Brazil West-Central	Cyathea	Cyatheaceae	Cyatheales	n	0			520	LC	LC	0
1582	Cyathea villosa	Brazil West-Central	Cyathea	Cyatheaceae	Cyatheales	n	0			521	LC	LC	0
1583	Cyathea villosa	Brazil South	Cyathea	Cyatheaceae	Cyatheales	n	0			521	LC	LC	0
1584	Cybianthus amplus	Brazil West-Central	Cybianthus	Primulaceae	Ericales	y	0			14331	LC	LC	0
1585	Cybianthus comperuvianus	Brazil West-Central	Cybianthus	Primulaceae	Ericales	y	0			522	LC	LC	0
1586	Cybianthus fulvopulverulentus	Brazil West-Central	Cybianthus	Primulaceae	Ericales	y	0			2311	LC	LC	0
1587	Cybianthus fuscus	Brazil West-Central	Cybianthus	Primulaceae	Ericales	y	0			523	LC	LC	0
1588	Cybianthus gardneri	Brazil West-Central	Cybianthus	Primulaceae	Ericales	y	0			3190	LC	LC	0
1589	Cybianthus goyazensis	Brazil West-Central	Cybianthus	Primulaceae	Ericales	y	0			14139	LC	LC	0
1590	Cybianthus guyanensis	Brazil West-Central	Cybianthus	Primulaceae	Ericales	y	0			11210	LC	LC	0
1591	Cybianthus minutiflorus	Brazil West-Central	Cybianthus	Primulaceae	Ericales	y	0			2676	LC	LC	0
1592	Cybianthus penduliflorus	Brazil West-Central	Cybianthus	Primulaceae	Ericales	y	0			16582	LC	LC	0
1593	Cybianthus peruvianus	Brazil West-Central	Cybianthus	Primulaceae	Ericales	y	0			15371	LC	LC	0
1594	Cybianthus peruvianus	Brazil South	Cybianthus	Primulaceae	Ericales	y	0			15371	LC	LC	0
1595	Cybianthus prieurii	Brazil West-Central	Cybianthus	Primulaceae	Ericales	y	0			16591	LC	LC	0
1596	Cybianthus psychotriifolius	Brazil West-Central	Cybianthus	Primulaceae	Ericales	y	0			524	LC	LC	0
1597	Cybianthus regnelii	Brazil West-Central	Cybianthus	Primulaceae	Ericales	y	0			525	EN	UR	0
1598	Cybianthus spicatus	Brazil West-Central	Cybianthus	Primulaceae	Ericales	y	0			16603	LC	LC	0
1599	Cybianthus venezuelanus	Brazil West-Central	Cybianthus	Primulaceae	Ericales	y	0			14343	LC	LC	0
1600	Cybistax antisyphilitica	Brazil South	Cybistax	Bignoniaceae	Lamiales	n	0			5043	LC	LC	0
1601	Cybistax antisyphilitica	Brazil West-Central	Cybistax	Bignoniaceae	Lamiales	n	0			5043	LC	LC	0
1602	Cyclolobium brasiliense	Brazil South	Cyclolobium	Fabaceae	Fabales	n	0			4967	LC	LC	0
1603	Cyclolobium brasiliense	Brazil West-Central	Cyclolobium	Fabaceae	Fabales	n	0			4967	LC	LC	0
1604	Cymbopetalum baillonii	Mexico Southeast	Cymbopetalum	Annonaceae	Magnoliales	y	0			19458	LC	LC	0
1605	Cymbopetalum brasiliense	Brazil West-Central	Cymbopetalum	Annonaceae	Magnoliales	y	0			8331	LC	LC	0
1606	Cymbopetalum hintonii	Mexico Southeast	Cymbopetalum	Annonaceae	Magnoliales	y	0			19065	EN	UR	0
1607	Cymbopetalum mayanum	Mexico Southeast	Cymbopetalum	Annonaceae	Magnoliales	y	0			16341	LC	LC	0
1608	Cymbopetalum mirabile	Mexico Southeast	Cymbopetalum	Annonaceae	Magnoliales	y	0			526	LC	LC	0
1609	Cymbopetalum penduliflorum	Mexico Southeast	Cymbopetalum	Annonaceae	Magnoliales	y	0			16380	LC	LC	0
1610	Cymbopetalum stenophyllum	Mexico Southeast	Cymbopetalum	Annonaceae	Magnoliales	y	0			18470	LC	LC	0
1611	Cymbopetalum steyermarkii	Mexico Southeast	Cymbopetalum	Annonaceae	Magnoliales	y	0			18631	EN	UR	0
1612	Cynometra bauhiniifolia	Brazil West-Central	Cynometra	Fabaceae	Fabales	n	0			2890	LC	LC	0
1613	Cynometra hemitomophylla	Mexico Southeast	Cynometra	Fabaceae	Fabales	n	0			527	LC	LC	0
1614	Cynometra marginata	Brazil West-Central	Cynometra	Fabaceae	Fabales	n	0			3538	LC	LC	0
1615	Cynometra oaxacana	Mexico Southeast	Cynometra	Fabaceae	Fabales	n	0			528	LC	LC	0
1616	Cynometra retusa	Mexico Southeast	Cynometra	Fabaceae	Fabales	n	0			16403	LC	LC	0
1617	Cynophalla flexuosa	Mexico Southeast	Cynophalla	Capparaceae	Brassicales	y	0			4517	LC	LC	0
1618	Cynophalla flexuosa	Brazil West-Central	Cynophalla	Capparaceae	Brassicales	y	0			4517	LC	LC	0
1619	Cynophalla flexuosa	Brazil South	Cynophalla	Capparaceae	Brassicales	y	0			4517	LC	LC	0
1620	Cynophalla mattogrossensis	Brazil West-Central	Cynophalla	Capparaceae	Brassicales	Y	0			529	LC	LC	0
1621	Cynophalla retusa	Brazil West-Central	Cynophalla	Capparaceae	Brassicales	n	0			530	LC	LC	0
1622	Cynophalla verrucosa	Mexico Southeast	Cynophalla	Capparaceae	Brassicales	Y	0			10051	LC	LC	0
1623	Cyrtocarpa caatingae	Brazil West-Central	Cyrtocarpa	Anacardiaceae	Sapindales	y	0			531	LC	LC	0
1624	Cyrtocarpa kruseana	Mexico Southeast	Cyrtocarpa	Anacardiaceae	Sapindales	y	0			19141	LC	LC	0
1625	Cyrtocarpa procera	Mexico Southeast	Cyrtocarpa	Anacardiaceae	Sapindales	y	0			19290	LC	LC	0
1626	Dacryodes microcarpa	Brazil West-Central	Dacryodes	Burseraceae	Sapindales	y	0			532	LC	LC	0
1627	Dacryodes nitens	Brazil West-Central	Dacryodes	Burseraceae	Sapindales	y	0			15381	LC	LC	0
1628	Dacryodes paraensis	Brazil West-Central	Dacryodes	Burseraceae	Sapindales	y	0			533	LC	LC	0
1629	Dahlstedtia dehiscens	Brazil West-Central	Dahlstedtia	Fabaceae	Fabales	n	0			534	CR	UR	0
1630	Dahlstedtia floribunda	Brazil South	Dahlstedtia	Fabaceae	Fabales	n	0			13076	LC	LC	0
1631	Dahlstedtia lewisiana	Brazil South	Dahlstedtia	Fabaceae	Fabales	n	0			535	CR	UR	0
1632	Dahlstedtia muehlbergiana	Brazil South	Dahlstedtia	Fabaceae	Fabales	n	0			536	LC	LC	0
1633	Dahlstedtia muehlbergiana	Brazil West-Central	Dahlstedtia	Fabaceae	Fabales	n	0			536	LC	LC	0
1634	Dahlstedtia pentaphylla	Brazil South	Dahlstedtia	Fabaceae	Fabales	n	0			11501	LC	LC	0
1635	Dalbergia acuta	Brazil West-Central	Dalbergia	Fabaceae	Fabales	n	0			12489	LC	LC	0
1636	Dalbergia brasiliensis	Brazil West-Central	Dalbergia	Fabaceae	Fabales	n	0			537	LC	LC	0
1637	Dalbergia brasiliensis	Brazil South	Dalbergia	Fabaceae	Fabales	n	0			537	LC	LC	0
1638	Dalbergia calycina	Mexico Southeast	Dalbergia	Fabaceae	Fabales	n	0			17884	VU	UR	0
1639	Dalbergia cearensis	Brazil West-Central	Dalbergia	Fabaceae	Fabales	n	0			12459	NT	LC	0
1640	Dalbergia congestiflora	Mexico Southeast	Dalbergia	Fabaceae	Fabales	n	0			18447	EN	UR	0
1641	Dalbergia densiflora	Brazil West-Central	Dalbergia	Fabaceae	Fabales	n	0			538	EN	UR	0
1642	Dalbergia ernest	Brazil South	Dalbergia	Fabaceae	Fabales	n	0			539	EN	UR	0
1643	Dalbergia foliolosa	Brazil South	Dalbergia	Fabaceae	Fabales	n	0			540	LC	LC	0
1644	Dalbergia glaucescens	Brazil West-Central	Dalbergia	Fabaceae	Fabales	n	0			12605	LC	LC	0
1645	Dalbergia glomerata	Mexico Southeast	Dalbergia	Fabaceae	Fabales	n	0			17436	CR	UR	0
1646	Dalbergia hortensis	Brazil West-Central	Dalbergia	Fabaceae	Fabales	n	0			541	EN	UR	0
1647	Dalbergia longepedunculata	Mexico Southeast	Dalbergia	Fabaceae	Fabales	n	0			19021	EN	UR	0
1648	Dalbergia luteola	Mexico Southeast	Dalbergia	Fabaceae	Fabales	n	0			18928	CR	UR	0
1649	Dalbergia melanocardium	Mexico Southeast	Dalbergia	Fabaceae	Fabales	n	0			17547	EN	UR	0
1650	Dalbergia miscolobium	Brazil West-Central	Dalbergia	Fabaceae	Fabales	n	0			542	LC	LC	0
1651	Dalbergia miscolobium	Brazil South	Dalbergia	Fabaceae	Fabales	n	0			542	LC	LC	0
1652	Dalbergia modesta	Mexico Southeast	Dalbergia	Fabaceae	Fabales	n	0			543	EN	UR	0
1653	Dalbergia nigra	Brazil South	Dalbergia	Fabaceae	Fabales	n	0			11274	VU	UR	0
1654	Dalbergia retusa	Mexico Southeast	Dalbergia	Fabaceae	Fabales	n	0			17365	CR	UR	0
1655	Dalbergia ruddiae	Mexico Southeast	Dalbergia	Fabaceae	Fabales	n	0			17587	EN	UR	0
1656	Dalbergia tucurensis	Mexico Southeast	Dalbergia	Fabaceae	Fabales	n	0			16525	EN	UR	0
1657	Dalbergia villosa	Brazil West-Central	Dalbergia	Fabaceae	Fabales	n	0			544	LC	LC	0
1658	Damburneya ambigens	Mexico Southeast	Damburneya	Lauraceae	Laurales	y	0			16574	LC	LC	0
1659	Damburneya colorata	Mexico Southeast	Damburneya	Lauraceae	Laurales	y	0			545	LC	LC	0
1660	Damburneya coriacea	Mexico Southeast	Damburneya	Lauraceae	Laurales	y	0			14342	LC	LC	0
1661	Damburneya gentlei	Mexico Southeast	Damburneya	Lauraceae	Laurales	y	0			16309	LC	LC	0
1662	Damburneya leucocome	Mexico Southeast	Damburneya	Lauraceae	Laurales	y	0			19893	EN	UR	0
1663	Damburneya longicaudata	Mexico Southeast	Damburneya	Lauraceae	Laurales	y	0			16310	LC	LC	0
1664	Damburneya martinicensis	Mexico Southeast	Damburneya	Lauraceae	Laurales	y	0			8253	LC	LC	0
1665	Damburneya matudae	Mexico Southeast	Damburneya	Lauraceae	Laurales	y	0			18989	EN	UR	0
1666	Damburneya nitida	Mexico Southeast	Damburneya	Lauraceae	Laurales	y	0			16268	LC	LC	0
1667	Damburneya rudis	Mexico Southeast	Damburneya	Lauraceae	Laurales	y	0			18503	VU	UR	0
1668	Damburneya salicifolia	Mexico Southeast	Damburneya	Lauraceae	Laurales	y	0			16424	LC	LC	0
1669	Daphnopsis americana	Mexico Southeast	Daphnopsis	Thymelaeaceae	Malvales	y	0			546	LC	LC	0
1670	Daphnopsis brasiliensis	Brazil South	Daphnopsis	Thymelaeaceae	Malvales	y	0			13196	LC	LC	0
1671	Daphnopsis coriacea	Brazil South	Daphnopsis	Thymelaeaceae	Malvales	y	0			12860	LC	LC	0
1672	Daphnopsis fasciculata	Brazil West-Central	Daphnopsis	Thymelaeaceae	Malvales	y	0			12866	LC	LC	0
1673	Daphnopsis fasciculata	Brazil South	Daphnopsis	Thymelaeaceae	Malvales	y	0			12866	LC	LC	0
1674	Daphnopsis ficina	Mexico Southeast	Daphnopsis	Thymelaeaceae	Malvales	y	0			547	LC	LC	0
1675	Daphnopsis flavida	Mexico Southeast	Daphnopsis	Thymelaeaceae	Malvales	y	0			19923	EN	UR	0
1676	Daphnopsis mollis	Mexico Southeast	Daphnopsis	Thymelaeaceae	Malvales	y	0			19655	VU	UR	0
1677	Daphnopsis perplexa	Mexico Southeast	Daphnopsis	Thymelaeaceae	Malvales	y	0			548	EN	UR	0
1678	Daphnopsis pseudosalix	Brazil South	Daphnopsis	Thymelaeaceae	Malvales	y	0			14079	EN	UR	0
1679	Daphnopsis racemosa	Brazil South	Daphnopsis	Thymelaeaceae	Malvales	y	0			11287	LC	LC	0
1680	Daphnopsis racemosa	Brazil West-Central	Daphnopsis	Thymelaeaceae	Malvales	y	0			11287	LC	LC	0
1681	Daphnopsis selerorum	Mexico Southeast	Daphnopsis	Thymelaeaceae	Malvales	y	0			18565	LC	LC	0
1682	Daphnopsis sellowiana	Brazil South	Daphnopsis	Thymelaeaceae	Malvales	y	0			549	LC	LC	0
1683	Daphnopsis utilis	Brazil West-Central	Daphnopsis	Thymelaeaceae	Malvales	y	0			12503	LC	LC	0
1684	Dasyphyllum brasiliense	Brazil West-Central	Dasyphyllum	Asteraceae	Asterales	n	0			4957	LC	LC	0
1685	Dasyphyllum brasiliense	Brazil South	Dasyphyllum	Asteraceae	Asterales	n	0			4957	LC	LC	0
1686	Dasyphyllum diacanthoides	Chile Central	Dasyphyllum	Asteraceae	Asterales	n	0			550	LC	LC	0
1687	Dasyphyllum excelsum	Chile Central	Dasyphyllum	Asteraceae	Asterales	n	0			551	LC	LC	0
1688	Dasyphyllum spinescens	Brazil South	Dasyphyllum	Asteraceae	Asterales	n	0			13054	LC	LC	0
1689	Davilla elliptica	Brazil West-Central	Davilla	Dilleniaceae	Dilleniales	n	0			552	LC	LC	0
1690	Davilla grandiflora	Brazil West-Central	Davilla	Dilleniaceae	Dilleniales	n	0			553	LC	LC	0
1691	Decatropis bicolor	Mexico Southeast	Decatropis	Rutaceae	Sapindales	n	0			554	LC	LC	0
1692	Decazyx esparzae	Mexico Southeast	Decazyx	Rutaceae	Sapindales	n	0			17548	CR	UR	0
1693	Deguelia spruceana	Brazil West-Central	Deguelia	Fabaceae	Fabales	n	0			555	LC	LC	0
1694	Deherainia matudae	Mexico Southeast	Deherainia	Primulaceae	Ericales	n	0			17549	VU	UR	0
1695	Deherainia smaragdina	Mexico Southeast	Deherainia	Primulaceae	Ericales	n	0			556	LC	LC	0
1696	Dendropanax arboreus	Brazil West-Central	Dendropanax	Araliaceae	Apiales	y	0			557	LC	LC	0
1697	Dendropanax arboreus	Mexico Southeast	Dendropanax	Araliaceae	Apiales	y	0			557	LC	LC	0
1698	Dendropanax australis	Brazil South	Dendropanax	Araliaceae	Apiales	y	0			13647	LC	LC	0
1699	Dendropanax cuneatus	Brazil South	Dendropanax	Araliaceae	Apiales	y	0			2193	LC	LC	0
1700	Dendropanax cuneatus	Brazil West-Central	Dendropanax	Araliaceae	Apiales	y	0			2193	LC	LC	0
1701	Dendropanax gonatopodus	Mexico Southeast	Dendropanax	Araliaceae	Apiales	y	0			18150	LC	LC	0
1702	Dendropanax hondurensis	Mexico Southeast	Dendropanax	Araliaceae	Apiales	y	0			18993	CR	UR	0
1703	Dendropanax leptopodus	Mexico Southeast	Dendropanax	Araliaceae	Apiales	y	0			16575	LC	LC	0
1704	Dendropanax oliganthus	Mexico Southeast	Dendropanax	Araliaceae	Apiales	y	0			558	EN	UR	0
1705	Dendropanax pallidus	Mexico Southeast	Dendropanax	Araliaceae	Apiales	y	0			559	EN	UR	0
1706	Dendropanax palustris	Brazil West-Central	Dendropanax	Araliaceae	Apiales	y	0			560	LC	LC	0
1707	Dendropanax populifolius	Mexico Southeast	Dendropanax	Araliaceae	Apiales	y	0			19696	EN	UR	0
1708	Dendrosida batesii	Mexico Southeast	Dendrosida	Malvaceae	Malvales	n	0			19980	VU	UR	0
1709	Dendrosida breedlovei	Mexico Southeast	Dendrosida	Malvaceae	Malvales	n	0			19150	LC	LC	0
1710	Dendrosida sharpiana	Mexico Southeast	Dendrosida	Malvaceae	Malvales	n	0			19942	LC	LC	0
1711	Deppea grandiflora	Mexico Southeast	Deppea	Rubiaceae	Gentianales	n	0			18230	LC	LC	0
1712	Desfontainia spinosa	Chile Central	Desfontainia	Columelliaceae	Bruniales	y	0			9019	LC	LC	0
1713	Desmopsis lanceolata	Mexico Southeast	Desmopsis	Annonaceae	Magnoliales	y	0			18725	NT	LC	0
1714	Desmopsis schippii	Mexico Southeast	Desmopsis	Annonaceae	Magnoliales	y	0			16381	LC	LC	0
1715	Desmopsis trunciflora	Mexico Southeast	Desmopsis	Annonaceae	Magnoliales	y	0			19075	VU	UR	0
1716	Dialium guianense	Mexico Southeast	Dialium	Fabaceae	Fabales	y	0			11615	LC	LC	0
1717	Dialium guianense	Brazil West-Central	Dialium	Fabaceae	Fabales	y	0			11615	LC	LC	0
1718	Dialypetalanthus fuscescens	Brazil West-Central	Dialypetalanthus	Rubiaceae	Gentianales	y	0			12691	LC	LC	0
1719	Diatenopteryx sorbifolia	Brazil South	Diatenopteryx	Sapindaceae	Sapindales	n	0			561	LC	LC	0
1720	Diatenopteryx sorbifolia	Brazil West-Central	Diatenopteryx	Sapindaceae	Sapindales	n	0			561	LC	LC	0
1721	Dicksonia sellowiana	Mexico Southeast	Dicksonia	Dicksoniaceae	Cyatheales	n	0			562	LC	LC	0
1722	Dicksonia sellowiana	Brazil South	Dicksonia	Dicksoniaceae	Cyatheales	n	0			562	LC	LC	0
1723	Diclinanona matogrossensis	Brazil West-Central	Diclinanona	Annonaceae	Magnoliales	y	0			563	LC	LC	0
1724	Dictyoloma vandellianum	Brazil West-Central	Dictyoloma	Rutaceae	Sapindales	n	0			15401	LC	LC	0
1725	Dictyoloma vandellianum	Brazil South	Dictyoloma	Rutaceae	Sapindales	n	0			15401	LC	LC	0
1726	Dilkea retusa	Brazil West-Central	Dilkea	Passifloraceae	Malpighiales	y	0			564	LC	LC	0
1727	Dilodendron bipinnatum	Brazil West-Central	Dilodendron	Sapindaceae	Sapindales	y	0			565	LC	LC	0
1728	Dimorphandra cuprea	Brazil West-Central	Dimorphandra	Fabaceae	Fabales	n	0			3359	LC	LC	0
1729	Dimorphandra gardneriana	Brazil West-Central	Dimorphandra	Fabaceae	Fabales	n	0			7726	LC	LC	0
1730	Dimorphandra macrostachya	Brazil West-Central	Dimorphandra	Fabaceae	Fabales	n	0			2607	LC	LC	0
1731	Dimorphandra mollis	Brazil West-Central	Dimorphandra	Fabaceae	Fabales	n	0			7728	LC	LC	0
1732	Dimorphandra parviflora	Brazil West-Central	Dimorphandra	Fabaceae	Fabales	n	0			3093	LC	LC	0
1733	Dimorphandra pennigera	Brazil West-Central	Dimorphandra	Fabaceae	Fabales	n	0			1979	LC	LC	0
1734	Dinizia excelsa	Brazil West-Central	Dinizia	Fabaceae	Fabales	n	0			2222	LC	LC	0
1735	Diospyros acapulcensis	Mexico Southeast	Diospyros	Ebenaceae	Ericales	y	0			17935	LC	LC	0
1736	Diospyros anisandra	Mexico Southeast	Diospyros	Ebenaceae	Ericales	y	0			566	LC	LC	0
1737	Diospyros bumelioides	Mexico Southeast	Diospyros	Ebenaceae	Ericales	y	0			567	LC	LC	0
1738	Diospyros capreifolia	Brazil West-Central	Diospyros	Ebenaceae	Ericales	y	0			10012	LC	LC	0
1739	Diospyros coccolobifolia	Brazil West-Central	Diospyros	Ebenaceae	Ericales	y	1	5	5	15936	LC	LC	1
1740	Diospyros conzattii	Mexico Southeast	Diospyros	Ebenaceae	Ericales	y	1	4	2	568	LC	LC	1
1741	Diospyros dalyom	Brazil West-Central	Diospyros	Ebenaceae	Ericales	y	0			569	LC	LC	0
1742	Diospyros guianensis	Brazil West-Central	Diospyros	Ebenaceae	Ericales	y	0			2317	LC	LC	0
1743	Diospyros hispida	Brazil South	Diospyros	Ebenaceae	Ericales	y	0	3	3	570	LC	LC	0
1744	Diospyros hispida	Brazil West-Central	Diospyros	Ebenaceae	Ericales	y	0	3	3	570	LC	LC	0
1745	Diospyros inconstans	Brazil South	Diospyros	Ebenaceae	Ericales	y	0			571	LC	LC	0
1746	Diospyros inconstans	Brazil West-Central	Diospyros	Ebenaceae	Ericales	y	0			571	LC	LC	0
1747	Diospyros juruensis	Mexico Southeast	Diospyros	Ebenaceae	Ericales	y	0			572	LC	LC	0
1748	Diospyros kanizur	Brazil West-Central	Diospyros	Ebenaceae	Ericales	y	0	3	3	573	LC	LC	0
1749	Diospyros krukovii	Brazil West-Central	Diospyros	Ebenaceae	Ericales	y	0			574	LC	LC	0
1750	Diospyros longifolia	Brazil West-Central	Diospyros	Ebenaceae	Ericales	y	0			575	LC	LC	0
1751	Diospyros nigra	Mexico Southeast	Diospyros	Ebenaceae	Ericales	y	1	4	4	16433	LC	LC	1
1752	Diospyros poeppigiana	Brazil West-Central	Diospyros	Ebenaceae	Ericales	y	0			3288	LC	LC	0
1753	Diospyros salicifolia	Mexico Southeast	Diospyros	Ebenaceae	Ericales	y	0			576	LC	LC	0
1754	Diospyros sericea	Brazil West-Central	Diospyros	Ebenaceae	Ericales	y	0			577	LC	LC	0
1755	Diospyros tetrandra	Brazil West-Central	Diospyros	Ebenaceae	Ericales	y	0			578	LC	LC	0
1756	Diospyros tetrasperma	Mexico Southeast	Diospyros	Ebenaceae	Ericales	y	0			579	LC	LC	0
1757	Diospyros vestita	Brazil West-Central	Diospyros	Ebenaceae	Ericales	y	0			580	LC	LC	0
1758	Diospyros xavantina	Brazil West-Central	Diospyros	Ebenaceae	Ericales	y	0			581	LC	LC	0
1759	Diospyros yatesiana	Mexico Southeast	Diospyros	Ebenaceae	Ericales	y	0			582	LC	LC	0
1760	Diospyros yucatanensis	Mexico Southeast	Diospyros	Ebenaceae	Ericales	y	0			16360	LC	LC	0
1761	Diphysa americana	Mexico Southeast	Diphysa	Fabaceae	Fabales	n	0			16618	LC	LC	0
1762	Diphysa carthagenensis	Mexico Southeast	Diphysa	Fabaceae	Fabales	n	0			14655	LC	LC	0
1763	Diphysa floribunda	Mexico Southeast	Diphysa	Fabaceae	Fabales	n	0			16672	LC	LC	0
1764	Diphysa humilis	Mexico Southeast	Diphysa	Fabaceae	Fabales	n	0			583	LC	LC	0
1765	Diphysa puberulenta	Mexico Southeast	Diphysa	Fabaceae	Fabales	n	0			18539	LC	LC	0
1766	Diphysa racemosa	Mexico Southeast	Diphysa	Fabaceae	Fabales	n	0			584	LC	LC	0
1767	Diphysa spinosa	Mexico Southeast	Diphysa	Fabaceae	Fabales	n	0			585	LC	LC	0
1768	Diphysa yucatanensis	Mexico Southeast	Diphysa	Fabaceae	Fabales	n	0			586	LC	LC	0
1769	Diplokeleba floribunda	Brazil West-Central	Diplokeleba	Sapindaceae	Sapindales	n	0			588	LC	LC	0
1770	Diplotropis brasiliensis	Brazil West-Central	Diplotropis	Fabaceae	Fabales	n	0			11393	LC	LC	0
1771	Diplotropis martiusii	Brazil West-Central	Diplotropis	Fabaceae	Fabales	n	0			589	LC	LC	0
1772	Diplotropis purpurea	Brazil West-Central	Diplotropis	Fabaceae	Fabales	n	0			11813	LC	LC	0
1773	Diplotropis triloba	Brazil West-Central	Diplotropis	Fabaceae	Fabales	n	0			2766	LC	LC	0
1774	Dipteryx alata	Brazil West-Central	Dipteryx	Fabaceae	Fabales	y	1	6.5		4385	VU	UR	1
1775	Dipteryx micrantha	Brazil West-Central	Dipteryx	Fabaceae	Fabales	y	1	5	3	590	LC	LC	1
1776	Dipteryx odorata	Brazil West-Central	Dipteryx	Fabaceae	Fabales	y	1	5	3	591	LC	LC	1
1777	Diptychandra aurantiaca	Brazil West-Central	Diptychandra	Fabaceae	Fabales	n	0			9224	LC	LC	0
1778	Dipyrena juncea	Chile Central	Dipyrena	Verbenaceae	Lamiales	n	0			592	VU	UR	0
1779	Discaria chacaye	Chile Central	Discaria	Rhamnaceae	Rosales	y	0			20509	LC	LC	0
1780	Discocarpus essequeboensis	Brazil West-Central	Discocarpus	Phyllanthaceae	Malpighiales	n	0			593	LC	LC	0
1781	Discocarpus spruceanus	Brazil West-Central	Discocarpus	Phyllanthaceae	Malpighiales	n	0			594	LC	LC	0
1782	Discocnide mexicana	Mexico Southeast	Discocnide	Urticaceae	Rosales	y	0			595	LC	LC	0
1783	Discophora guianensis	Brazil West-Central	Discophora	Stemonuraceae	Aquifoliales	n	0			15421	LC	LC	0
1784	Dodecastigma amazonicum	Brazil West-Central	Dodecastigma	Euphorbiaceae	Malpighiales	n	0			2120	LC	LC	0
1785	Dodonaea viscosa	Mexico Southeast	Dodonaea	Sapindaceae	Sapindales	n	0			4518	LC	LC	0
1786	Dodonaea viscosa	Chile Central	Dodonaea	Sapindaceae	Sapindales	n	0			4518	LC	LC	0
1787	Dodonaea viscosa	Brazil South	Dodonaea	Sapindaceae	Sapindales	n	0			4518	LC	LC	0
1788	Dracaena americana	Mexico Southeast	Dracaena	Asparagaceae	Asparagales	n	0			16657	LC	LC	0
1789	Drimys andina	Chile Central	Drimys	Winteraceae	Canellales	y	0			596	EN	UR	0
1790	Drimys angustifolia	Brazil South	Drimys	Winteraceae	Canellales	y	0			597	LC	LC	0
1791	Drimys brasiliensis	Brazil West-Central	Drimys	Winteraceae	Canellales	y	0			598	LC	LC	0
1792	Drimys brasiliensis	Brazil South	Drimys	Winteraceae	Canellales	y	0			598	LC	LC	0
1793	Drimys granadensis	Mexico Southeast	Drimys	Winteraceae	Canellales	y	0			599	LC	LC	0
1794	Drimys winteri	Chile Central	Drimys	Winteraceae	Canellales	y	0			20433	LC	LC	0
1795	Drypetes amazonica	Brazil West-Central	Drypetes	Putranjivaceae	Malpighiales	y	0			10041	LC	LC	0
1796	Drypetes brownii	Mexico Southeast	Drypetes	Putranjivaceae	Malpighiales	y	0			16343	LC	LC	0
1797	Drypetes lateriflora	Mexico Southeast	Drypetes	Putranjivaceae	Malpighiales	y	0			14449	LC	LC	0
1798	Drypetes variabilis	Brazil West-Central	Drypetes	Putranjivaceae	Malpighiales	y	0			10054	LC	LC	0
1799	Duckeodendron cestroides	Brazil West-Central	Duckeodendron	Solanaceae	Solanales	y	0			2149	LC	LC	0
1800	Duguetia argentea	Brazil West-Central	Duguetia	Annonaceae	Magnoliales	y	0	2.5	3	3483	LC	LC	0
1801	Duguetia aripuanae	Brazil West-Central	Duguetia	Annonaceae	Magnoliales	y	0			600	EN	UR	0
1802	Duguetia cadaverica	Brazil West-Central	Duguetia	Annonaceae	Magnoliales	y	0			601	LC	LC	0
1803	Duguetia calycina	Brazil West-Central	Duguetia	Annonaceae	Magnoliales	y	0			2790	LC	LC	0
1804	Duguetia echinophora	Brazil West-Central	Duguetia	Annonaceae	Magnoliales	y	0			2088	LC	LC	0
1805	Duguetia flagellaris	Brazil West-Central	Duguetia	Annonaceae	Magnoliales	y	0			8381	LC	LC	0
1806	Duguetia hadrantha	Brazil West-Central	Duguetia	Annonaceae	Magnoliales	y	0			12010	LC	LC	0
1807	Duguetia inconspicua	Brazil West-Central	Duguetia	Annonaceae	Magnoliales	y	0			4580	LC	LC	0
1808	Duguetia lanceolata	Brazil West-Central	Duguetia	Annonaceae	Magnoliales	y	2	5	5	13141	LC	LC	1
1809	Duguetia lanceolata	Brazil South	Duguetia	Annonaceae	Magnoliales	y	2	5	5	13141	LC	LC	1
1810	Duguetia latifolia	Brazil West-Central	Duguetia	Annonaceae	Magnoliales	y	0			12110	LC	LC	0
1811	Duguetia marcgraviana	Brazil West-Central	Duguetia	Annonaceae	Magnoliales	y	2	>7	>7	2640	LC	LC	1
1812	Duguetia megalocarpa	Brazil West-Central	Duguetia	Annonaceae	Magnoliales	y	4			8391	LC	LC	1
1813	Duguetia riparia	Brazil West-Central	Duguetia	Annonaceae	Magnoliales	y	0			17541	LC	LC	0
1814	Duguetia spixiana	Brazil West-Central	Duguetia	Annonaceae	Magnoliales	y	2	6	5	12310	LC	LC	1
1815	Duguetia stelechantha	Brazil West-Central	Duguetia	Annonaceae	Magnoliales	y	2	4	4	2825	LC	LC	1
1816	Duguetia surinamensis	Brazil West-Central	Duguetia	Annonaceae	Magnoliales	y	2	>7	>7	8401	LC	LC	1
1817	Duguetia trunciflora	Brazil West-Central	Duguetia	Annonaceae	Magnoliales	y	0			12410	LC	LC	0
1818	Dulacia candida	Brazil West-Central	Dulacia	Olacaceae	Santalales	y	0			16642	LC	LC	0
1819	Dulacia egleri	Brazil West-Central	Dulacia	Olacaceae	Santalales	y	0			602	LC	LC	0
1820	Dulacia inopiflora	Brazil West-Central	Dulacia	Olacaceae	Santalales	y	0			4077	LC	LC	0
1821	Dulacia papillosa	Brazil West-Central	Dulacia	Olacaceae	Santalales	y	0			603	LC	LC	0
1822	Dulacia pauciflora	Brazil West-Central	Dulacia	Olacaceae	Santalales	y	0			604	LC	LC	0
1823	Duranta erecta	Mexico Southeast	Duranta	Verbenaceae	Lamiales	y	0			6816	LC	LC	0
1824	Duranta vestita	Brazil South	Duranta	Verbenaceae	Lamiales	y	0			11382	LC	LC	0
1825	Duroia duckei	Brazil West-Central	Duroia	Rubiaceae	Gentianales	y	0	3	2	605	LC	LC	0
1826	Duroia genipoides	Brazil West-Central	Duroia	Rubiaceae	Gentianales	y	0			3139	LC	LC	0
1827	Duroia gransabanensis	Brazil West-Central	Duroia	Rubiaceae	Gentianales	y	0			606	LC	LC	0
1828	Duroia macrophylla	Brazil West-Central	Duroia	Rubiaceae	Gentianales	y	0			607	LC	LC	0
1829	Duroia micrantha	Brazil West-Central	Duroia	Rubiaceae	Gentianales	y	0			2121	LC	LC	0
1830	Duroia prancei	Brazil West-Central	Duroia	Rubiaceae	Gentianales	y	0			16073	LC	LC	0
1831	Duroia saccifera	Brazil West-Central	Duroia	Rubiaceae	Gentianales	y	0			2414	LC	LC	0
1832	Dussia cuscatlanica	Mexico Southeast	Dussia	Fabaceae	Fabales	n	0			608	LC	LC	0
1833	Ebenopsis ebano	Mexico Southeast	Ebenopsis	Fabaceae	Fabales	n	0			19608	LC	LC	0
1834	Ecclinusa ramiflora	Brazil South	Ecclinusa	Sapotaceae	Ericales	y	0			5938	LC	LC	0
1835	Ecclinusa ramiflora	Brazil West-Central	Ecclinusa	Sapotaceae	Ericales	y	0			5938	LC	LC	0
1836	Ehretia anacua	Mexico Southeast	Ehretia	Ehretiaceae	Boraginales	y	0			18473	LC	LC	0
1837	Ehretia latifolia	Mexico Southeast	Ehretia	Ehretiaceae	Boraginales	y	0			18079	LC	LC	0
1838	Ehretia tinifolia	Mexico Southeast	Ehretia	Ehretiaceae	Boraginales	y	0			609	LC	LC	0
1839	Elaeodendron xylocarpum	Mexico Southeast	Elaeodendron	Celastraceae	Celastrales	y	0			610	LC	LC	0
1840	Elaeoluma glabrescens	Brazil West-Central	Elaeoluma	Sapotaceae	Ericales	y	0			5943	LC	LC	0
1841	Embothryum coccineum	Chile Central	Embothryum	Proteaceae	Proteales	n	0			611	LC	LC	0
1842	Emmotum floribundum	Brazil West-Central	Emmotum	Metteniusaceae	Metteniusales	y	0			612	LC	LC	0
1843	Emmotum nitens	Brazil West-Central	Emmotum	Metteniusaceae	Metteniusales	y	0			1982	LC	LC	0
1844	Emmotum orbiculatum	Brazil West-Central	Emmotum	Metteniusaceae	Metteniusales	y	0			613	LC	LC	0
1845	Endlicheria anomala	Brazil West-Central	Endlicheria	Lauraceae	Laurales	y	0			5952	LC	LC	0
1846	Endlicheria formosa	Brazil West-Central	Endlicheria	Lauraceae	Laurales	y	0			11401	LC	LC	0
1847	Endlicheria glomerata	Brazil West-Central	Endlicheria	Lauraceae	Laurales	y	0			11681	LC	LC	0
1848	Endlicheria levelii	Brazil West-Central	Endlicheria	Lauraceae	Laurales	y	0			614	LC	LC	0
1849	Endlicheria lhotzkyi	Brazil West-Central	Endlicheria	Lauraceae	Laurales	y	0			7555	VU	UR	0
1850	Endlicheria longicaudata	Brazil West-Central	Endlicheria	Lauraceae	Laurales	y	0			615	LC	LC	0
1851	Endlicheria macrophylla	Brazil West-Central	Endlicheria	Lauraceae	Laurales	y	0			3362	LC	LC	0
1852	Endlicheria metallica	Brazil West-Central	Endlicheria	Lauraceae	Laurales	y	0			15441	LC	LC	0
1853	Endlicheria paniculata	Brazil West-Central	Endlicheria	Lauraceae	Laurales	y	0			12703	LC	LC	0
1854	Endlicheria paniculata	Brazil South	Endlicheria	Lauraceae	Laurales	y	0			12703	LC	LC	0
1855	Endlicheria robusta	Brazil West-Central	Endlicheria	Lauraceae	Laurales	y	0			616	LC	LC	0
1856	Endlicheria sericea	Brazil West-Central	Endlicheria	Lauraceae	Laurales	y	0			617	LC	LC	0
1857	Endlicheria sprucei	Brazil West-Central	Endlicheria	Lauraceae	Laurales	y	0			1983	LC	LC	0
1858	Endlicheria szyszylowiczii	Brazil West-Central	Endlicheria	Lauraceae	Laurales	y	0			8424	LC	LC	0
1859	Endlicheria zapoteoides	Mexico Southeast	Endlicheria	Lauraceae	Laurales	y	0			618	EN	UR	0
1860	Endopleura uchi	Brazil West-Central	Endopleura	Humiriaceae	Malpighiales	y	1	4 a 6	4	2150	LC	LC	1
1861	Enriquebeltrania crenatifolia	Mexico Southeast	Enriquebeltrania	Euphorbiaceae	Malpighiales	n	0			619	LC	LC	0
1862	Enterolobium contortisiliquum	Brazil West-Central	Enterolobium	Fabaceae	Fabales	n	0			5035	LC	LC	0
1863	Enterolobium contortisiliquum	Brazil South	Enterolobium	Fabaceae	Fabales	n	0			5035	LC	LC	0
1864	Enterolobium cyclocarpum	Mexico Southeast	Enterolobium	Fabaceae	Fabales	n	0			2151	LC	LC	0
1865	Enterolobium gummiferum	Brazil West-Central	Enterolobium	Fabaceae	Fabales	n	0			12643	LC	LC	0
1866	Enterolobium maximum	Brazil West-Central	Enterolobium	Fabaceae	Fabales	n	0			10081	LC	LC	0
1867	Enterolobium schomburgkii	Mexico Southeast	Enterolobium	Fabaceae	Fabales	n	0			13610	LC	LC	0
1868	Enterolobium schomburgkii	Brazil West-Central	Enterolobium	Fabaceae	Fabales	n	0			13610	LC	LC	0
1869	Ephedranthus parviflorus	Brazil West-Central	Ephedranthus	Annonaceae	Magnoliales	y	0			2225	LC	LC	0
1870	Erblichia odorata	Mexico Southeast	Erblichia	Passifloraceae	Malpighiales	y	0			16481	LC	LC	0
1871	Eremanthus argenteus	Brazil West-Central	Eremanthus	Asteraceae	Asterales	n	0			15992	EN	UR	0
1872	Eremanthus capitatus	Brazil West-Central	Eremanthus	Asteraceae	Asterales	n	0			620	LC	LC	0
1873	Eremanthus cinctus	Brazil West-Central	Eremanthus	Asteraceae	Asterales	n	0			14277	LC	LC	0
1874	Eremanthus erythropappus	Brazil West-Central	Eremanthus	Asteraceae	Asterales	n	0			12925	LC	LC	0
1875	Eremanthus glomerulatus	Brazil West-Central	Eremanthus	Asteraceae	Asterales	n	0			12504	LC	LC	0
1876	Eremanthus goyazensis	Brazil West-Central	Eremanthus	Asteraceae	Asterales	n	0			15993	LC	LC	0
1877	Eremanthus mattogrossensis	Brazil West-Central	Eremanthus	Asteraceae	Asterales	n	0			15956	LC	LC	0
1878	Eremanthus pohlii	Brazil West-Central	Eremanthus	Asteraceae	Asterales	n	0			621	EN	UR	0
1879	Eremanthus rondoniensis	Brazil West-Central	Eremanthus	Asteraceae	Asterales	n	0			622	LC	LC	0
1880	Eremanthus uniflorus	Brazil West-Central	Eremanthus	Asteraceae	Asterales	n	0			15954	LC	LC	0
1881	Eremanthus veadeiroensis	Brazil West-Central	Eremanthus	Asteraceae	Asterales	n	0			16044	EN	UR	0
1882	Eremocaulon capitatum	Brazil West-Central	Eremocaulon	Poaceae	Poales	n	0			623	LC	LC	0
1883	Eriotheca candolleana	Brazil West-Central	Eriotheca	Malvaceae	Malvales	n	0			12259	LC	LC	0
1884	Eriotheca estevesiae	Brazil West-Central	Eriotheca	Malvaceae	Malvales	n	0			16040	NT	LC	0
1885	Eriotheca globosa	Brazil West-Central	Eriotheca	Malvaceae	Malvales	n	0			5981	LC	LC	0
1886	Eriotheca gracilipes	Brazil West-Central	Eriotheca	Malvaceae	Malvales	n	0			624	LC	LC	0
1887	Eriotheca pubescens	Brazil West-Central	Eriotheca	Malvaceae	Malvales	n	0			625	LC	LC	0
1888	Eriotheca roseorum	Brazil West-Central	Eriotheca	Malvaceae	Malvales	n	0			626	LC	LC	0
1889	Eriotheca surinamensis	Brazil West-Central	Eriotheca	Malvaceae	Malvales	n	0			627	LC	LC	0
1890	Erisma bicolor	Brazil West-Central	Erisma	Vochysiaceae	Myrtales	n	0			628	LC	LC	0
1891	Erisma bracteosum	Brazil West-Central	Erisma	Vochysiaceae	Myrtales	n	0			2988	LC	LC	0
1892	Erisma floribundum	Brazil West-Central	Erisma	Vochysiaceae	Myrtales	n	0			629	LC	LC	0
1893	Erisma gracile	Brazil West-Central	Erisma	Vochysiaceae	Myrtales	n	0			630	LC	LC	0
1894	Erisma uncinatum	Brazil West-Central	Erisma	Vochysiaceae	Myrtales	n	0			12731	LC	LC	0
1895	Erithalis fruticosa	Mexico Southeast	Erithalis	Rubiaceae	Gentianales	y	0			14297	LC	LC	0
1896	Erythrina americana	Mexico Southeast	Erythrina	Fabaceae	Fabales	n	0			631	LC	LC	0
1897	Erythrina berteroana	Mexico Southeast	Erythrina	Fabaceae	Fabales	n	0			632	LC	LC	0
1898	Erythrina chiapasana	Mexico Southeast	Erythrina	Fabaceae	Fabales	n	0			633	LC	LC	0
1899	Erythrina crista	Brazil South	Erythrina	Fabaceae	Fabales	n	0			634	LC	LC	0
1900	Erythrina crista	Brazil West-Central	Erythrina	Fabaceae	Fabales	n	0			634	LC	LC	0
1901	Erythrina dominguezii	Brazil West-Central	Erythrina	Fabaceae	Fabales	n	0			4854	LC	LC	0
1902	Erythrina falcata	Brazil West-Central	Erythrina	Fabaceae	Fabales	n	0			4912	LC	LC	0
1903	Erythrina falcata	Brazil South	Erythrina	Fabaceae	Fabales	n	0			4912	LC	LC	0
1904	Erythrina florenciae	Mexico Southeast	Erythrina	Fabaceae	Fabales	n	0			18919	LC	LC	0
1905	Erythrina folkersii	Mexico Southeast	Erythrina	Fabaceae	Fabales	n	0			16434	LC	LC	0
1906	Erythrina fusca	Brazil West-Central	Erythrina	Fabaceae	Fabales	n	0			19241	LC	LC	0
1907	Erythrina fusca	Mexico Southeast	Erythrina	Fabaceae	Fabales	n	0			19241	LC	LC	0
1908	Erythrina goldmanii	Mexico Southeast	Erythrina	Fabaceae	Fabales	n	0			635	LC	LC	0
1909	Erythrina lanata	Mexico Southeast	Erythrina	Fabaceae	Fabales	n	0			636	LC	LC	0
1910	Erythrina mexicana	Mexico Southeast	Erythrina	Fabaceae	Fabales	n	0			18847	LC	LC	0
1911	Erythrina pudica	Mexico Southeast	Erythrina	Fabaceae	Fabales	n	0			637	EN	UR	0
1912	Erythrina similis	Brazil West-Central	Erythrina	Fabaceae	Fabales	n	0			638	LC	LC	0
1913	Erythrina speciosa	Brazil South	Erythrina	Fabaceae	Fabales	n	0			11793	LC	LC	0
1914	Erythrina speciosa	Brazil West-Central	Erythrina	Fabaceae	Fabales	n	0			11793	LC	LC	0
1915	Erythrina standleyana	Mexico Southeast	Erythrina	Fabaceae	Fabales	n	0			15057	LC	LC	0
1916	Erythrina steyermarkii	Mexico Southeast	Erythrina	Fabaceae	Fabales	n	0			17619	LC	LC	0
1917	Erythrina tajumulcensis	Mexico Southeast	Erythrina	Fabaceae	Fabales	n	0			639	LC	LC	0
1918	Erythrina tuxtlana	Mexico Southeast	Erythrina	Fabaceae	Fabales	n	0			19492	VU	UR	0
1919	Erythrina ulei	Brazil West-Central	Erythrina	Fabaceae	Fabales	n	0			2227	LC	LC	0
1920	Erythrina velutina	Brazil West-Central	Erythrina	Fabaceae	Fabales	n	0			640	LC	LC	0
1921	Erythrina verna	Brazil West-Central	Erythrina	Fabaceae	Fabales	n	0			13910	LC	LC	0
1922	Erythrochiton brasiliense	Brazil West-Central	Erythrochiton	Rutaceae	Sapindales	n	0			641	LC	LC	0
1923	Erythroxylum amazonicum	Brazil West-Central	Erythroxylum	Erythroxylaceae	Malpighiales	y	0			12741	LC	LC	0
1924	Erythroxylum ambiguum	Brazil South	Erythroxylum	Erythroxylaceae	Malpighiales	y	0			642	LC	LC	0
1925	Erythroxylum amplifolium	Brazil South	Erythroxylum	Erythroxylaceae	Malpighiales	y	0			12596	VU	UR	0
1926	Erythroxylum amplifolium	Brazil West-Central	Erythroxylum	Erythroxylaceae	Malpighiales	y	0			12596	VU	UR	0
1927	Erythroxylum anguifugum	Brazil West-Central	Erythroxylum	Erythroxylaceae	Malpighiales	y	0			643	LC	LC	0
1928	Erythroxylum anguifugum	Brazil South	Erythroxylum	Erythroxylaceae	Malpighiales	y	0			643	LC	LC	0
1929	Erythroxylum argentinum	Brazil South	Erythroxylum	Erythroxylaceae	Malpighiales	y	0			644	LC	LC	0
1930	Erythroxylum barbatum	Brazil West-Central	Erythroxylum	Erythroxylaceae	Malpighiales	y	0			645	LC	LC	0
1931	Erythroxylum bequaertii	Mexico Southeast	Erythroxylum	Erythroxylaceae	Malpighiales	y	0			646	LC	LC	0
1932	Erythroxylum buxus	Brazil South	Erythroxylum	Erythroxylaceae	Malpighiales	y	0			647	LC	LC	0
1933	Erythroxylum caatingae	Brazil West-Central	Erythroxylum	Erythroxylaceae	Malpighiales	y	0			14169	LC	LC	0
1934	Erythroxylum citrifolium	Brazil West-Central	Erythroxylum	Erythroxylaceae	Malpighiales	y	0			5991	LC	LC	0
1935	Erythroxylum confusum	Mexico Southeast	Erythroxylum	Erythroxylaceae	Malpighiales	y	0			648	LC	LC	0
1936	Erythroxylum cuneifolium	Brazil West-Central	Erythroxylum	Erythroxylaceae	Malpighiales	y	0			649	LC	LC	0
1937	Erythroxylum cuneifolium	Brazil South	Erythroxylum	Erythroxylaceae	Malpighiales	y	0			649	LC	LC	0
1938	Erythroxylum cuspidifolium	Brazil South	Erythroxylum	Erythroxylaceae	Malpighiales	y	0			11825	LC	LC	0
1939	Erythroxylum daphnites	Brazil West-Central	Erythroxylum	Erythroxylaceae	Malpighiales	y	0			5036	LC	LC	0
1940	Erythroxylum deciduum	Brazil West-Central	Erythroxylum	Erythroxylaceae	Malpighiales	y	0			7530	LC	LC	0
1941	Erythroxylum deciduum	Brazil South	Erythroxylum	Erythroxylaceae	Malpighiales	y	0			7530	LC	LC	0
1942	Erythroxylum engleri	Brazil West-Central	Erythroxylum	Erythroxylaceae	Malpighiales	y	0			7540	LC	LC	0
1943	Erythroxylum fimbriatum	Brazil West-Central	Erythroxylum	Erythroxylaceae	Malpighiales	y	0			6001	LC	LC	0
1944	Erythroxylum gracilipes	Brazil West-Central	Erythroxylum	Erythroxylaceae	Malpighiales	y	0			10102	LC	LC	0
1945	Erythroxylum havanense	Mexico Southeast	Erythroxylum	Erythroxylaceae	Malpighiales	y	0			7322	LC	LC	0
1946	Erythroxylum leptoneurum	Brazil West-Central	Erythroxylum	Erythroxylaceae	Malpighiales	y	0			4760	LC	LC	0
1947	Erythroxylum ligustrinum	Brazil West-Central	Erythroxylum	Erythroxylaceae	Malpighiales	y	0			4551	LC	LC	0
1948	Erythroxylum macrophyllum	Mexico Southeast	Erythroxylum	Erythroxylaceae	Malpighiales	y	0			14010	LC	LC	0
1949	Erythroxylum macrophyllum	Brazil West-Central	Erythroxylum	Erythroxylaceae	Malpighiales	y	0			14010	LC	LC	0
1950	Erythroxylum maracasense	Brazil West-Central	Erythroxylum	Erythroxylaceae	Malpighiales	y	0			650	LC	LC	0
1951	Erythroxylum mexicanum	Mexico Southeast	Erythroxylum	Erythroxylaceae	Malpighiales	y	0			651	LC	LC	0
1952	Erythroxylum mucronatum	Brazil West-Central	Erythroxylum	Erythroxylaceae	Malpighiales	y	0			14110	LC	LC	0
1953	Erythroxylum myrsinites	Brazil West-Central	Erythroxylum	Erythroxylaceae	Malpighiales	y	0			11430	LC	LC	0
1954	Erythroxylum myrsinites	Brazil South	Erythroxylum	Erythroxylaceae	Malpighiales	y	0			11430	LC	LC	0
1955	Erythroxylum patentissimum	Brazil West-Central	Erythroxylum	Erythroxylaceae	Malpighiales	y	0			652	LC	LC	0
1956	Erythroxylum pelleterianum	Brazil South	Erythroxylum	Erythroxylaceae	Malpighiales	y	0			12274	LC	LC	0
1957	Erythroxylum pelleterianum	Brazil West-Central	Erythroxylum	Erythroxylaceae	Malpighiales	y	0			12274	LC	LC	0
1958	Erythroxylum rotundifolium	Mexico Southeast	Erythroxylum	Erythroxylaceae	Malpighiales	y	0			653	LC	LC	0
1959	Erythroxylum rufum	Brazil West-Central	Erythroxylum	Erythroxylaceae	Malpighiales	y	0			2071	LC	LC	0
1960	Erythroxylum squamatum	Brazil West-Central	Erythroxylum	Erythroxylaceae	Malpighiales	y	0			15451	LC	LC	0
1961	Erythroxylum suberosum	Brazil South	Erythroxylum	Erythroxylaceae	Malpighiales	y	0			1984	LC	LC	0
1962	Erythroxylum suberosum	Brazil West-Central	Erythroxylum	Erythroxylaceae	Malpighiales	y	0			1984	LC	LC	0
1963	Erythroxylum suberosum	Mexico Southeast	Erythroxylum	Erythroxylaceae	Malpighiales	y	0			1984	LC	LC	0
1964	Erythroxylum subracemosum	Brazil West-Central	Erythroxylum	Erythroxylaceae	Malpighiales	y	0			7541	LC	LC	0
1965	Erythroxylum subrotundum	Brazil West-Central	Erythroxylum	Erythroxylaceae	Malpighiales	y	0			11130	LC	LC	0
1966	Erythroxylum tortuosum	Brazil West-Central	Erythroxylum	Erythroxylaceae	Malpighiales	y	0			4361	LC	LC	0
1967	Erythroxylum tortuosum	Brazil South	Erythroxylum	Erythroxylaceae	Malpighiales	y	0			4361	LC	LC	0
1968	Escallonia bifida	Brazil South	Escallonia	Escalloniaceae	Escalloniales	y	0			11516	LC	LC	0
1969	Escallonia chlorophylla	Brazil South	Escallonia	Escalloniaceae	Escalloniales	y	0			654	LC	LC	0
1970	Escallonia megapotamica	Brazil South	Escallonia	Escalloniaceae	Escalloniales	y	0			655	LC	LC	0
1971	Escallonia myrtoidea	Chile Central	Escallonia	Escalloniaceae	Escalloniales	y	0			656	LC	LC	0
1972	Escallonia petrophila	Brazil South	Escallonia	Escalloniaceae	Escalloniales	y	0			657	VU	UR	0
1973	Escallonia pulverulenta	Chile Central	Escallonia	Escalloniaceae	Escalloniales	y	0			16243	LC	LC	0
1974	Escallonia revoluta	Chile Central	Escallonia	Escalloniaceae	Escalloniales	y	0			16244	LC	LC	0
1975	Escallonia rubra	Chile Central	Escallonia	Escalloniaceae	Escalloniales	y	0			658	LC	LC	0
1976	Eschweilera albiflora	Brazil West-Central	Eschweilera	Lecythidaceae	Ericales	n	0			14212	LC	LC	0
1977	Eschweilera amazonica	Brazil West-Central	Eschweilera	Lecythidaceae	Ericales	n	0			2708	LC	LC	0
1978	Eschweilera coriacea	Brazil West-Central	Eschweilera	Lecythidaceae	Ericales	n	0			14411	LC	LC	0
1979	Eschweilera laevicarpa	Brazil West-Central	Eschweilera	Lecythidaceae	Ericales	n	0			659	LC	LC	0
1980	Eschweilera micrantha	Brazil West-Central	Eschweilera	Lecythidaceae	Ericales	n	0			2515	LC	LC	0
1981	Eschweilera nana	Brazil West-Central	Eschweilera	Lecythidaceae	Ericales	n	0			7548	LC	LC	0
1982	Eschweilera ovata	Brazil West-Central	Eschweilera	Lecythidaceae	Ericales	n	0			2734	LC	LC	0
1983	Eschweilera parvifolia	Brazil West-Central	Eschweilera	Lecythidaceae	Ericales	n	0			17593	LC	LC	0
1984	Eschweilera pedicellata	Brazil West-Central	Eschweilera	Lecythidaceae	Ericales	n	0			8442	LC	LC	0
1985	Eschweilera romeu	Brazil West-Central	Eschweilera	Lecythidaceae	Ericales	n	0			660	LC	LC	0
1986	Eschweilera tessmannii	Brazil West-Central	Eschweilera	Lecythidaceae	Ericales	n	0			14512	LC	LC	0
1987	Esenbeckia almawillia	Brazil West-Central	Esenbeckia	Rutaceae	Sapindales	n	0			2152	LC	LC	0
1988	Esenbeckia berlandieri	Mexico Southeast	Esenbeckia	Rutaceae	Sapindales	n	0			17661	EN	UR	0
1989	Esenbeckia bicolor	Mexico Southeast	Esenbeckia	Rutaceae	Sapindales	n	0			18930	EN	UR	0
1990	Esenbeckia cowanii	Brazil West-Central	Esenbeckia	Rutaceae	Sapindales	n	0			661	LC	LC	0
1991	Esenbeckia densiflora	Brazil South	Esenbeckia	Rutaceae	Sapindales	n	0			662	LC	LC	0
1992	Esenbeckia febrifuga	Brazil South	Esenbeckia	Rutaceae	Sapindales	n	0			663	LC	LC	0
1993	Esenbeckia febrifuga	Brazil West-Central	Esenbeckia	Rutaceae	Sapindales	n	0			663	LC	LC	0
1994	Esenbeckia grandiflora	Brazil West-Central	Esenbeckia	Rutaceae	Sapindales	n	0			15462	LC	LC	0
1995	Esenbeckia grandiflora	Brazil South	Esenbeckia	Rutaceae	Sapindales	n	0			15462	LC	LC	0
1996	Esenbeckia hieronymi	Brazil West-Central	Esenbeckia	Rutaceae	Sapindales	n	0			664	LC	LC	0
1997	Esenbeckia hieronymi	Brazil South	Esenbeckia	Rutaceae	Sapindales	n	0			664	LC	LC	0
1998	Esenbeckia leiocarpa	Brazil West-Central	Esenbeckia	Rutaceae	Sapindales	n	0			7582	VU	UR	0
1999	Esenbeckia leiocarpa	Brazil South	Esenbeckia	Rutaceae	Sapindales	n	0			7582	VU	UR	0
2000	Esenbeckia oligantha	Brazil West-Central	Esenbeckia	Rutaceae	Sapindales	n	0			14249	EN	UR	0
2001	Esenbeckia pentaphylla	Mexico Southeast	Esenbeckia	Rutaceae	Sapindales	n	0			6400	LC	LC	0
2002	Esenbeckia pilocarpoides	Brazil West-Central	Esenbeckia	Rutaceae	Sapindales	n	0			665	LC	LC	0
2003	Eugenia acapulcensis	Mexico Southeast	Eugenia	Myrtaceae	Myrtales	y	0			9601	LC	LC	0
[truncated: 3,958 more rows]

## Sheet: stable isotopes of modern plant
TAGUA TAGUA AREA (wettest area)
ID IRMS	SAMPLE ID	peso (mg)	mg N2	ug N2	mg C	ug C	δ13C vs. VPDB normalizados	%N	%C	C/N	ID
41451	SAMPLE ERWIN BOX1 83	4.854	0.065349	65.349	2.68459	2684.59	-33.5136	1.34629	55.3068	41.0808	Persea lingue
41452	SAMPLE ERWIN BOX1 84	4.81	0.0356073	35.6073	2.68369	2683.69	-32.8981	0.740277	55.794	75.3691	Lomatia hirsuta
41453	SAMPLE ERWIN BOX1 85	4.598	0.0367083	36.7083	1.97573	1975.73	-31.7795	0.798354	42.9692	53.8223	Peumus boldus
41454	SAMPLE ERWIN BOX1 86	5.002	0.0367269	36.7269	2.91977	2919.77	-30.7774	0.734244	58.3721	79.4996	Peumus boldus
41455	SAMPLE ERWIN BOX1 87	5.064	0.0281146	28.1146	2.74706	2747.06	-33.2103	0.555186	54.2469	97.7094	Drimys winteri
41456	SAMPLE ERWIN BOX1 88	4.5	0.0443848	44.3848	2.04532	2045.32	-31.8124	0.98633	45.4516	46.0815	Luma chequen
41457	SAMPLE ERWIN BOX1 89	5.22	0.0651248	65.1248	3.03415	3034.15	-34.2767	1.2476	58.1255	46.5898	Drimys winteri
41458	SAMPLE ERWIN BOX1 90	4.957	0.0777818	77.7818	2.51325	2513.25	-30.2408	1.56913	50.7011	32.3116	Drimys winteri
41465	SAMPLE ERWIN BOX1 91	4.796	0.0575899	57.5899	2.35585	2355.85	-32.1613	1.20079	49.1211	40.9073	Aristotelia chilensis
41466	SAMPLE ERWIN BOX1 92	4.943	0.0481059	48.1059	2.96188	2961.88	-29.1229	0.973213	59.9207	61.57	Cryptocarya alba
41467	SAMPLE ERWIN BOX1 93	4.681	0.202147	202.147	2.67194	2671.94	-25.8776	4.31846	57.0806	13.2178	Nothofagus glauca
41468	SAMPLE ERWIN BOX1 94	4.848	0.058878	58.878	2.2496	2249.6	-31.7765	1.21448	46.4027	38.2079	Luma chequen
41469	SAMPLE ERWIN BOX1 95	4.747	0.239103	239.103	2.50265	2502.65	-26.4219	5.03694	52.7206	10.4668	Nothofagus macrocarpa
41470	SAMPLE ERWIN BOX1 96	4.989	0.0520782	52.0782	2.91572	2915.72	-30.645	1.04386	58.4429	55.9872	Cryptocarya alba
41471	SAMPLE ERWIN BOX2 97	5.13	0.0449884	44.9884	2.99405	2994.05	-28.8103	0.876968	58.3636	66.5516	Cryptocarya alba
41472	SAMPLE ERWIN BOX2 98	5.111	0.0621354	62.1354	2.3411	2341.1	-27.2945	1.21572	45.8051	37.6774	Crinodendron patagua
41473	SAMPLE ERWIN BOX2 99	4.925	0.0521996	52.1996	2.19795	2197.95	-33.1156	1.05989	44.6285	42.1067	Temu cruckshanksii
41474	SAMPLE ERWIN BOX2 100	4.936	0.0989399	98.9399	2.52064	2520.64	-31.9958	2.00445	51.0665	25.4765	Temu cruckshanksii
41475	SAMPLE ERWIN BOX2 101	4.567	0.0750741	75.0741	2.61083	2610.83	-25.5103	1.64384	57.1674	34.7768	Temu cruckshanksii
41476	SAMPLE ERWIN BOX2 102	4.687	0.0446057	44.6057	2.44254	2442.54	-31.5082	0.95169	52.113	54.7584	Temu cruckshanksii
41477	SAMPLE ERWIN BOX2 103	5.051	0.0465683	46.5683	2.73367	2733.67	-32.4195	0.921961	54.1213	58.7024	Azara serrata
41478	SAMPLE ERWIN BOX2 104	4.8	0.0540239	54.0239	2.70877	2708.77	-26.8057	1.1255	56.4327	50.1402	Lardizabala biternata
42145	SAMPLE ERWIN BOX4 V1	4.298	0.028024	28.024	1.91415	1914.15	-29.5062	0.652025	44.5358	68.3038	Cryptocarya alba
42146	SAMPLE ERWIN BOX4 V2	4.403	0.0310147	31.0147	2.27471	2274.71	-30.8802	0.704398	51.6627	73.343	Cryptocarya alba
42147	SAMPLE ERWIN BOX4 V3	4.207	0.0439595	43.9595	2.85672	2856.72	-26.3124	1.04491	67.9039	64.9851	Cryptocarya alba
42148	SAMPLE ERWIN BOX4 V4	4.151	0.0361065	36.1065	2.0942	2094.2	-29.6242	0.869827	50.4506	58.0007	Cryptocarya alba
42149	SAMPLE ERWIN BOX4 V5	4.429	0.0434159	43.4159	2.40893	2408.93	-28.9692	0.980265	54.3899	55.4849	Cryptocarya alba
42150	SAMPLE ERWIN BOX4 V6	4.425	0.0353002	35.3002	2.30411	2304.11	-31.4414	0.797746	52.0702	65.2717	Cryptocarya alba
42151	SAMPLE ERWIN BOX4 V7	4.09	0.0329247	32.9247	2.13132	2131.32	-32.5606	0.805005	52.1106	64.7332	Cryptocarya alba
42152	SAMPLE ERWIN BOX4 V8	4.312	0.0338507	33.8507	2.35218	2352.18	-29.4887	0.785034	54.5496	69.487	Cryptocarya alba
42153	SAMPLE ERWIN BOX4 V9	4.426	0.0309282	30.9282	2.38856	2388.56	-31.2822	0.698785	53.9665	77.2291	Cryptocarya alba
42154	SAMPLE ERWIN BOX4 V10	4.126	0.0430535	43.0535	2.18676	2186.76	-31.0639	1.04347	52.9995	50.7916	Cryptocarya alba
42155	SAMPLE ERWIN BOX4 V11	4.467	0.0391619	39.1619	1.81321	1813.21	-31.2325	0.876694	40.5912	46.3003	Peumus boldus
42156	SAMPLE ERWIN BOX4 V12	4.391	0.0505874	50.5874	1.97267	1972.67	-28.8125	1.15207	44.9254	38.9953	Peumus boldus
42161	SAMPLE ERWIN BOX4 V13	4.42	0.0360816	36.0816	1.79188	1791.88	-31.2233	0.816325	40.5403	49.662	Peumus boldus
42162	SAMPLE ERWIN BOX4 V14	4.23	0.03283	32.83	1.65475	1654.75	-33.6734	0.776122	39.1195	50.4038	Peumus boldus
42163	SAMPLE ERWIN BOX4 V15	4.126	0.0500072	50.0072	1.75643	1756.43	-30.4507	1.212	42.5698	35.1235	Peumus boldus
42164	SAMPLE ERWIN BOX4 V16	4.358	0.0422008	42.2008	1.8774	1877.4	-31.4852	0.968351	43.0793	44.4872	Luma chequen
42165	SAMPLE ERWIN BOX4 V17	4.282	0.0417586	41.7586	1.79419	1794.19	-31.6927	0.975212	41.9008	42.9659	Luma chequen
42166	SAMPLE ERWIN BOX4 V18	4.438	0.0398435	39.8435	1.9365	1936.5	-30.8754	0.897781	43.6346	48.6028	Luma chequen
42167	SAMPLE ERWIN BOX4 V19	4.083	0.0425449	42.5449	1.65092	1650.92	-30.9188	1.042	40.434	38.8042	Luma chequen
42168	SAMPLE ERWIN BOX4 V20	4.463	0.0425914	42.5914	1.97491	1974.91	-32.1918	0.954322	44.2507	46.3687	Luma chequen
42169	SAMPLE ERWIN BOX4 V21	4.309	0.0370258	37.0258	1.8188	1818.8	-33.2008	0.859266	42.2093	49.1225	Peumus boldus
42170	SAMPLE ERWIN BOX4 V22	4.231	0.0350925	35.0925	1.7201	1720.1	-34.087	0.829413	40.6548	49.0163	Peumus boldus
42171	SAMPLE ERWIN BOX4 V23	4.475	0.0555695	55.5695	1.93705	1937.05	-33.3735	1.24178	43.286	34.8581	Peumus boldus
42172	SAMPLE ERWIN BOX4 V24	4.1987	0.0432763	43.2763	1.85924	1859.24	-32.0936	1.03071	44.2814	42.9622	Peumus boldus
42180	SAMPLE ERWIN BOX4 V25	4.461	0.0421841	42.1841	1.77523	1775.23	-33.7489	0.94562	39.7945	42.0829	Peumus boldus
42181	SAMPLE ERWIN BOX4 V26	4.284	0.040944	40.944	2.44471	2444.71	-31.0252	0.955742	57.066	59.7086	Lomatia hirsuta
42182	SAMPLE ERWIN BOX4 V27	4.416	0.0333569	33.3569	2.48532	2485.32	-29.5699	0.755365	56.2798	74.5067	Lomatia hirsuta
42183	SAMPLE ERWIN BOX4 V28	4.463	0.037084	37.084	2.60827	2608.27	-28.7526	0.83092	58.4421	70.3342	Lomatia hirsuta
42184	SAMPLE ERWIN BOX4 V29	4.247	0.025075	25.075	2.41342	2413.42	-29.1886	0.590417	56.8265	96.248	Lomatia hirsuta
42185	SAMPLE ERWIN BOX4 V30	4.473	0.0369792	36.9792	2.58697	2586.97	-28.0678	0.826721	57.8353	69.9574	Lomatia hirsuta
42186	SAMPLE ERWIN BOX4 V31	4.484	0.0440626	44.0626	2.6204	2620.4	-29.0886	0.982663	58.4389	59.4699	Lomatia hirsuta
42187	SAMPLE ERWIN BOX4 V32	4.05	0.0357042	35.7042	2.27188	2271.88	-28.5835	0.881585	56.0957	63.6305	Lomatia hirsuta
42188	SAMPLE ERWIN BOX4 V33	4.045	0.0366684	36.6684	2.41383	2413.83	-27.0286	0.906511	59.6743	65.8286	Lomatia hirsuta
42189	SAMPLE ERWIN BOX4 V34	4.255	0.0395526	39.5526	2.42566	2425.66	-27.3669	0.929556	57.0073	61.3274	Lomatia hirsuta
42190	SAMPLE ERWIN BOX4 V35	4.239	0.0376043	37.6043	2.45188	2451.88	-26.7729	0.887103	57.8411	65.2022	Lomatia hirsuta
42191	SAMPLE ERWIN BOX4 V36	4.251	0.102846	102.846	2.29112	2291.12	-27.7886	2.41933	53.896	22.2772	Nothofagus glauca
42173	SAMPLE ERWIN BOX4 V37	4.393	0.0635888	63.5888	2.1541	2154.1	-30.7805	1.4475	49.0348	33.8754	Nothofagus glauca
42174	SAMPLE ERWIN BOX4 V38	4.253	0.16511	165.11	2.35105	2351.05	-27.8281	3.8822	55.2799	14.2393	Nothofagus glauca
TAGUA TAGUA AREA (most arid area)
ID IRMS	SAMPLE ID	peso (mg)	mg N2	ug N2	mg C	ug C	δ13C vs. VPDB normalizados	%N	%C	C/N	ID
41336	SAMPLE ERWIN BOX1 4	5.176	0.0882189	88.2189	2.54244	2542.44	-26.8377	1.70438	49.1197	28.8196	Peumus boldus
41337	SAMPLE ERWIN BOX1 5	4.53	0.0501749	50.1749	2.18759	2187.59	-25.8797	1.10761	48.2911	43.5992	Quillaja saponaria
41338	SAMPLE ERWIN BOX1 6	4.821	0.0521976	52.1976	2.7073	2707.3	-26.0745	1.08271	56.1564	51.8665	Quillaja saponaria
41339	SAMPLE ERWIN BOX1 7	4.713	0.0450969	45.0969	2.34595	2345.95	-28.4009	0.956862	49.7762	52.0203	Quillaja saponaria
41340	SAMPLE ERWIN BOX1 8	4.614	0.0452655	45.2655	2.51957	2519.57	-26.6173	0.981046	54.607	55.6621	Quillaja saponaria
41341	SAMPLE ERWIN BOX1 9	4.647	0.0584838	58.4838	2.32197	2321.97	-27.9776	1.25853	49.9672	39.7028	Quillaja saponaria
41342	SAMPLE ERWIN BOX1 10	5.188	0.0575843	57.5843	2.71871	2718.71	-27.6086	1.10995	52.4037	47.2127	Quillaja saponaria
41343	SAMPLE ERWIN BOX1 11	5.032	0.0569225	56.9225	2.35818	2358.18	-25.5149	1.13121	46.8637	41.428	Quillaja saponaria
41344	SAMPLE ERWIN BOX1 12	5.053	0.108249	108.249	2.49851	2498.51	-26.6904	2.14227	49.4461	23.0812	Chusquea quila
41350	SAMPLE ERWIN BOX1 13	5.019	0.0887814	88.7814	2.4705	2470.5	-28.4418	1.76891	49.2229	27.8268	Chusquea quila
41351	SAMPLE ERWIN BOX1 14	4.671	0.237081	237.081	2.53943	2539.43	-25.2929	5.07559	54.3659	10.7113	Trevoa trinervis
41352	SAMPLE ERWIN BOX1 15	4.888	0.250684	250.684	2.69807	2698.07	-24.2326	5.12856	55.1977	10.7628	Trevoa trinervis
41353	SAMPLE ERWIN BOX1 16	5.104	0.0971506	97.1506	2.46995	2469.95	-25.3343	1.90342	48.3924	25.4239	Chusquea quila
41354	SAMPLE ERWIN BOX1 17	4.915	0.0933572	93.3572	2.29859	2298.59	-26.9292	1.89943	46.7669	24.6215	Chusquea quila
41355	SAMPLE ERWIN BOX1 18	5.087	0.0452513	45.2513	2.70466	2704.66	-28.3715	0.889547	53.168	59.7697	Escallonia pulverulenta
41428	SAMPLE ERWIN BOX1 65	5.175	0.070633	70.633	2.47282	2472.82	-25.6036	1.36489	47.7839	35.0094	Lithraea caustica
41429	SAMPLE ERWIN BOX1 66	5.037	0.0571043	57.1043	2.20796	2207.96	-25.7317	1.1337	43.8347	38.6653	Lithraea caustica
41430	SAMPLE ERWIN BOX1 67	4.757	0.049652	49.652	2.24446	2244.46	-24.7484	1.04377	47.1822	45.2037	Lithraea caustica
41431	SAMPLE ERWIN BOX1 68	4.68	0.0743491	74.3491	2.22588	2225.88	-25.6136	1.58866	47.5616	29.9383	Lithraea caustica
41432	SAMPLE ERWIN BOX1 69	5.025	0.0712805	71.2805	2.25085	2250.85	-24.5205	1.41852	44.7931	31.5774	Lithraea caustica
41433	SAMPLE ERWIN BOX1 70	5.186	0.133871	133.871	2.56413	2564.13	-24.2768	2.5814	49.4433	19.1537	Chusquea quila
41434	SAMPLE ERWIN BOX1 71	5.242	0.177464	177.464	2.65048	2650.48	-26.9466	3.38542	50.5623	14.9353	Chusquea quila
41435	SAMPLE ERWIN BOX1 72	4.734	0.0418187	41.8187	2.44114	2441.14	-27.503	0.883369	51.5662	58.3745	Escallonia pulverulenta
41441	SAMPLE ERWIN BOX1 73	5.128	0.0382207	38.2207	2.62044	2620.44	-30.3573	0.745333	51.1005	68.5606	Escallonia pulverulenta
41442	SAMPLE ERWIN BOX1 74	5.083	0.0398191	39.8191	1.86306	1863.06	-26.3807	0.783377	36.6528	46.7882	Colliguaja odorifera
41443	SAMPLE ERWIN BOX1 75	5.265	0.0806498	80.6498	2.1209	2120.9	-24.5827	1.53181	40.283	26.2976	Colliguaja odorifera
41444	SAMPLE ERWIN BOX1 76	4.673	0.0460709	46.0709	2.05276	2052.76	-24.7249	0.985895	43.928	44.5565	Colliguaja odorifera
41445	SAMPLE ERWIN BOX1 77	4.747	0.0336836	33.6836	2.00829	2008.29	-27.619	0.709576	42.3066	59.6223	Colliguaja odorifera
41446	SAMPLE ERWIN BOX1 78	4.88	0.0574482	57.4482	2.98602	2986.02	-25.9571	1.17722	61.189	51.9776	Cryptocarya alba
41447	SAMPLE ERWIN BOX1 79	4.81	0.0858242	85.8242	2.8546	2854.6	-26.5251	1.78429	59.3472	33.261	Cryptocarya alba
41448	SAMPLE ERWIN BOX1 80	5.154	0.0564771	56.4771	3.00191	3001.91	-27.1201	1.09579	58.2443	53.1528	Cryptocarya alba
41449	SAMPLE ERWIN BOX1 81	4.889	0.0643526	64.3526	2.80574	2805.74	-28.1904	1.31627	57.3889	43.5995	Cryptocarya alba
41450	SAMPLE ERWIN BOX1 82	5.061	0.0752646	75.2646	2.8489	2848.9	-26.4917	1.48715	56.2912	37.8518	Cryptocarya alba
FRAY JORGE NATIONAL PARK (wettest area)
ID IRMS	SAMPLE ID	peso (mg)	mg N2	ug N2	mg C	ug C	δ13C vs. VPDB normalizados	%N	%C	C/N	ID
41984	SAMPLE ERWIN BOX2 157	4.514	0.0519772	51.9772	2.29478	2294.78	-33.5339	1.15147	50.8369	44.1498	Aextoxicom punctatum
41985	SAMPLE ERWIN BOX2 158	4.486	0.04444	44.44	2.27969	2279.69	-35.1538	0.990637	50.8178	51.2981	Aextoxicom punctatum
41987	SAMPLE ERWIN BOX2 160	4.635	0.0406764	40.6764	2.42808	2428.08	-31.0404	0.877591	52.3857	59.6926	Aextoxicon punctatum
41990	SAMPLE ERWIN BOX2 163	4.48	0.0393731	39.3731	2.26906	2269.06	-31.4952	0.878863	50.6486	57.6297	Aextoxicon punctatum
41991	SAMPLE ERWIN BOX2 164	4.625	0.0423121	42.3121	2.26747	2267.47	-30.2629	0.914857	49.0265	53.5892	Aextoxicon punctatum
41993	SAMPLE ERWIN BOX2 166	4.353	0.0403854	40.3854	2.26299	2262.99	-32.5188	0.927761	51.9869	56.0348	Aextoxicon punctatum
41994	SAMPLE ERWIN BOX2 167	4.549	0.0455355	45.5355	2.37436	2374.36	-32.979	1.001	52.1953	52.1432	Aextoxicon punctatum
41995	SAMPLE ERWIN BOX2 168	4.815	0.0486408	48.6408	2.53318	2533.18	-33.4168	1.01019	52.6102	52.0793	Aextoxicon punctatum
41958	SAMPLE ERWIN BOX2 181	4.681	0.0366202	36.6202	1.99121	1991.21	-29.731	0.782315	42.5381	54.3747	Myrleugenia correifolia
41959	SAMPLE ERWIN BOX2 182	4.567	0.0489234	48.9234	2.34383	2343.83	-28.4	1.07124	51.321	47.9082	Myrleugenia correifolia
41960	SAMPLE ERWIN BOX2 183	5.034	0.0477481	47.7481	2.61074	2610.74	-28.1482	0.948512	51.8621	54.6774	Myrceugenia correifolia
41961	SAMPLE ERWIN BOX2 184	4.92	0.0429156	42.9156	2.40875	2408.75	-30.4372	0.872268	48.9583	56.1276	Myrceugenia correifolia
41962	SAMPLE ERWIN BOX2 185	4.539	0.0308717	30.8717	2.17151	2171.51	-30.5085	0.680143	47.8411	70.3398	Myrceugenia correifolia
41963	SAMPLE ERWIN BOX2 186	5.036	0.0534982	53.4982	2.52514	2525.14	-30.425	1.06232	50.1417	47.2003	Myrceugenia correifolia
42019	SAMPLE ERWIN BOX2 187	5.02	0.0535963	53.5963	2.64611	2646.11	-31.0161	1.06766	52.7114	49.3711	Myrceugenia correifolia
42020	SAMPLE ERWIN BOX2 188	4.599	0.0354399	35.4399	2.34973	2349.73	-32.6758	0.7706	51.0922	66.3018	Myrceugenia correifolia
42021	SAMPLE ERWIN BOX2 189	5.105	0.0785784	78.5784	2.71522	2715.22	-32.8791	1.53924	53.1875	34.5543	Drimys winteri
42022	SAMPLE ERWIN BOX2 190	5.15	0.0652379	65.2379	2.8053	2805.3	-31.8485	1.26676	54.4718	43.001	Drimys winteri
42023	SAMPLE ERWIN BOX2 191	4.59	0.0789641	78.9641	2.47995	2479.95	-33.906	1.72035	54.0294	31.4061	Drimys winteri
42024	SAMPLE ERWIN BOX2 192	4.714	0.0667024	66.7024	2.48619	2486.19	-33.7531	1.41499	52.7405	37.2728	Drimys winteri
42027	SAMPLE ERWIN BOX2 193	4.85	0.0691544	69.1544	2.64105	2641.05	-31.2611	1.42586	54.4546	38.1906	Drimys winteri
42028	SAMPLE ERWIN BOX2 194	4.725	0.084031	84.031	2.53886	2538.86	-33.1881	1.77843	53.7324	30.2133	Drimys winteri
42029	SAMPLE ERWIN BOX2 195	5.002	0.0765836	76.5836	2.72367	2723.67	-34.8415	1.53106	54.4517	35.5647	Drimys winteri
42030	SAMPLE ERWIN BOX2 196	4.794	0.0708035	70.8035	2.55286	2552.86	-33.6466	1.47692	53.2511	36.0555	Drimys winteri
42031	SAMPLE ERWIN BOX2 197	5.045	0.0768845	76.8845	2.74993	2749.93	-32.2454	1.52397	54.508	35.767	Drimys winteri
42032	SAMPLE ERWIN BOX2 198	4.804	0.0817419	81.7419	2.6991	2699.1	-31.8104	1.70154	56.1845	33.0198	Drimys winteri
42083	SAMPLE ERWIN BOX2 236	4.829	0.0857881	85.7881	2.55648	2556.48	-29.2942	1.77652	52.9401	29.7999	Rhaphithamus spinosus
42084	SAMPLE ERWIN BOX2 237	4.883	0.0800779	80.0779	2.3281	2328.1	-29.7817	1.63993	47.6777	29.073	Rhaphithamus spinosus
42085	SAMPLE ERWIN BOX2 238	4.686	0.0804636	80.4636	2.16539	2165.39	-31.1854	1.71711	46.2097	26.9114	Rhaphithamus spinosus
42086	SAMPLE ERWIN BOX2 239	4.87	0.089176	89.176	2.18074	2180.74	-30.9017	1.83113	44.7791	24.4543	Rhaphithamus spinosus
42087	SAMPLE ERWIN BOX2 240	4.626	0.0737077	73.7077	2.14176	2141.76	-32.8616	1.59334	46.2984	29.0575	Rhaphithamus spinosus
42092	SAMPLE ERWIN BOX2 241	5.027	0.0750608	75.0608	2.32077	2320.77	-31.4938	1.49315	46.1662	30.9186	Rhaphithamus spinosus
42128	SAMPLE ERWIN BOX2 266	4.585	0.0485643	48.5643	2.51056	2510.56	-35.2046	1.0592	54.7558	51.6955	Griselinia scadens
42129	SAMPLE ERWIN BOX2 267	5.058	0.053573	53.573	2.76148	2761.48	-30.5816	1.05917	54.5962	51.546	Griselinia scadens
42130	SAMPLE ERWIN BOX2 268	4.952	0.0725257	72.5257	2.85196	2851.96	-29.8311	1.46457	57.5921	39.3234	Griselinia scadens
42131	SAMPLE ERWIN BOX2 269	4.737	0.0829837	82.9837	2.56012	2560.12	-32.7551	1.75182	54.0451	30.8508	Griselinia scadens
42132	SAMPLE ERWIN BOX2 270	4.782	0.0568379	56.8379	2.30147	2301.47	-33.5688	1.18858	48.1277	40.4918	Griselinia scadens
42133	SAMPLE ERWIN BOX2 271	4.504	0.0398136	39.8136	2.43542	2435.42	-33.5983	0.883961	54.0725	61.1707	Griselinia scadens
42134	SAMPLE ERWIN BOX2 272	4.661	0.046621	46.621	2.67455	2674.55	-32.0579	1.00024	57.3815	57.368	Griselinia scadens
42135	SAMPLE ERWIN BOX2 273	4.729	0.0493024	49.3024	2.69442	2694.42	-32.0893	1.04255	56.9766	54.651	Griselinia scadens
42136	SAMPLE ERWIN BOX2 274	4.706	0.0545056	54.5056	2.47936	2479.36	-33.7404	1.15822	52.685	45.4881	Griselinia scadens
42137	SAMPLE ERWIN BOX2 275	4.598	0.0741748	74.1748	2.41101	2411.01	-30.7254	1.6132	52.436	32.5044	Griselinia scadens
42139	SAMPLE ERWIN BOX2 276	4.987	0.0621791	62.1791	2.74895	2748.95	-27.9414	1.24682	55.1222	44.2101	Griselinia scadens
FRAY JORGE NATIONAL PARK (most arid area)
ID IRMS	SAMPLE ID	peso (mg)	mg N2	ug N2	mg C	ug C	δ13C vs. VPDB normalizados	%N	%C	C/N	ID
41479	SAMPLE ERWIN BOX2 105	5.155	0.0950738	95.0738	2.79317	2793.17	-24.4162	1.8443	54.1837	29.379	Porlieria chilensis
41480	SAMPLE ERWIN BOX2 106	4.763	0.100835	100.835	2.685	2685	-26.455	2.11705	56.3721	26.6277	Porlieria chilensis
41481	SAMPLE ERWIN BOX2 107	4.528	0.0458736	45.8736	1.98119	1981.19	-25.1164	1.01311	43.7543	43.1881	Lithraea caustica
41482	SAMPLE ERWIN BOX2 108	4.666	0.039438	39.438	2.0499	2049.9	-27.6522	0.845221	43.9327	51.9777	Lithraea caustica
41489	SAMPLE ERWIN BOX2 109	5.026	0.0888928	88.8928	2.7534	2753.4	-28.9624	1.76866	54.783	30.9743	Porlieria chilensis
41490	SAMPLE ERWIN BOX2 110	4.616	0.126706	126.706	2.59115	2591.15	-29.1227	2.74492	56.1342	20.4502	Porlieria chilensis
41491	SAMPLE ERWIN BOX2 111	4.81	0.0390334	39.0334	1.87564	1875.64	-26.6946	0.811505	38.9946	48.0522	Lithraea caustica
41492	SAMPLE ERWIN BOX2 112	4.823	0.0519838	51.9838	2.12197	2121.97	-24.9395	1.07783	43.9969	40.8198	Lithraea caustica
41493	SAMPLE ERWIN BOX2 113	4.532	0.0423178	42.3178	1.92141	1921.41	-25.5438	0.933755	42.3966	45.4044	Lithraea caustica
41494	SAMPLE ERWIN BOX2 114	4.566	0.168848	168.848	2.43802	2438.02	-30.1039	3.69794	53.395	14.4391	Vachellia caven
41495	SAMPLE ERWIN BOX2 115	4.701	0.0435587	43.5587	1.88664	1886.64	-25.7325	0.926583	40.1327	43.3126	Lithraea caustica
41496	SAMPLE ERWIN BOX2 116	5.15	0.144336	144.336	2.85108	2851.08	-26.6587	2.80265	55.3607	19.753	Porlieria chilensis
41497	SAMPLE ERWIN BOX2 117	4.694	0.12148	121.48	2.52491	2524.91	-26.7595	2.588	53.7901	20.7845	Vachellia caven
41498	SAMPLE ERWIN BOX2 118	4.593	0.0555565	55.5565	2.03242	2032.42	-23.9444	1.20959	44.2503	36.5829	Lithraea caustica
41500	SAMPLE ERWIN BOX2 120	4.635	0.14482	144.82	2.35835	2358.35	-27.8469	3.12449	50.8813	16.2847	Vachellia caven
41507	SAMPLE ERWIN BOX2 121	4.631	0.143095	143.095	2.43031	2430.31	-32.9972	3.08995	52.4792	16.9838	Vachellia caven
41508	SAMPLE ERWIN BOX2 122	4.667	0.048546	48.546	1.96937	1969.37	-24.287	1.0402	42.1977	40.5671	Lithraea caustica
41509	SAMPLE ERWIN BOX2 123	4.711	0.113576	113.576	2.4322	2432.2	-28.238	2.41088	51.6281	21.4147	Vachellia caven
41510	SAMPLE ERWIN BOX2 124	5.212	0.0805014	80.5014	2.84782	2847.82	-28.8452	1.54454	54.6398	35.3761	Porlieria chilensis
41511	SAMPLE ERWIN BOX2 125	4.54	0.112976	112.976	1.91827	1918.27	-29.8536	2.48846	42.2526	16.9794	Vachellia caven
41512	SAMPLE ERWIN BOX2 126	4.965	0.0439971	43.9971	2.0293	2029.3	-28.1309	0.886144	40.8721	46.1236	Lithraea caustica
41513	SAMPLE ERWIN BOX2 127	5.064	0.103143	103.143	2.45451	2454.51	-27.8836	2.03679	48.4698	23.7971	Peumus boldus
41514	SAMPLE ERWIN BOX2 128	5.097	0.102565	102.565	2.86455	2864.55	-27.3947	2.01226	56.2008	27.9292	Porlieria chilensis
41515	SAMPLE ERWIN BOX2 129	4.693	0.091233	91.233	2.56552	2565.52	-25.2324	1.94402	54.6669	28.1205	Porlieria chilensis
41516	SAMPLE ERWIN BOX2 130	5.084	0.0876182	87.6182	2.51316	2513.16	-28.9428	1.72341	49.4328	28.6831	Porlieria chilensis
41517	SAMPLE ERWIN BOX2 131	4.896	0.111688	111.688	2.40552	2405.52	-28.8776	2.28121	49.1324	21.5379	Vachellia caven
41518	SAMPLE ERWIN BOX2 132	4.888	0.0366325	36.6325	1.86779	1867.79	-25.661	0.749436	38.2118	50.9874	Lithraea caustica
41525	SAMPLE ERWIN BOX2 133	4.968	0.12346	123.46	2.65832	2658.32	-29.2597	2.4851	53.5089	21.5318	Vachellia caven
41526	SAMPLE ERWIN BOX2 134	4.851	0.0355298	35.5298	2.08751	2087.51	-29.9433	0.732422	43.0325	58.7537	Quillaja saponaria
42038	SAMPLE ERWIN BOX2 199	4.901	0.167929	167.929	2.24518	2245.18	-23.7041	3.42643	45.8106	13.3698	Adesma bedwellii
42039	SAMPLE ERWIN BOX2 200	4.695	0.129655	129.655	2.10688	2106.88	-22.7611	2.76155	44.875	16.2499	Senna cumingii
42040	SAMPLE ERWIN BOX2 201	4.692	0.11096	110.96	1.978	1978	-23.6133	2.36487	42.1569	17.8263	Senna cumingii
42041	SAMPLE ERWIN BOX2 202	5.076	0.141898	141.898	2.33353	2333.53	-23.62	2.79547	45.9719	16.4451	Senna cumingii
42042	SAMPLE ERWIN BOX2 203	4.941	0.0964838	96.4838	2.23112	2231.12	-22.9128	1.95272	45.1552	23.1243	Senna cumingii
42043	SAMPLE ERWIN BOX2 204	4.637	0.0695534	69.5534	2.06025	2060.25	-25.4516	1.49997	44.4306	29.6211	Senna cumingii
42044	SAMPLE ERWIN BOX2 205	4.528	0.121428	121.428	2.10783	2107.83	-22.942	2.68171	46.5509	17.3587	Senna cumingii
42045	SAMPLE ERWIN BOX2 206	4.628	0.131936	131.936	2.06128	2061.28	-24.0544	2.85081	44.5394	15.6234	Senna cumingii
42046	SAMPLE ERWIN BOX2 207	4.871	0.115064	115.064	2.26772	2267.72	-24.0647	2.36223	46.5556	19.7083	Senna cumingii
42047	SAMPLE ERWIN BOX2 208	4.564	0.130702	130.702	2.13858	2138.58	-24.4441	2.86376	46.8576	16.3623	Adesnia bedwellii
42048	SAMPLE ERWIN BOX2 209	5.022	0.155403	155.403	2.31655	2316.55	-24.9236	3.09445	46.128	14.9067	Adesma bedwellii
42049	SAMPLE ERWIN BOX2 210	4.62	0.140063	140.063	2.09859	2098.59	-25.7421	3.03166	45.424	14.9832	Adesnia bedwellii
42050	SAMPLE ERWIN BOX2 211	4.7	0.104975	104.975	1.99682	1996.82	-26.2408	2.23352	42.4855	19.0218	Adesnia bedwellii
41937	SAMPLE ERWIN BOX2 136	4.561	0.0487372	48.7372	2.00775	2007.75	-29.5056	1.06856	44.02	41.1955	Quillaya saponaria
41945	SAMPLE ERWIN BOX2 144	4.509	0.05283	52.83	2.08274	2082.74	-32.1909	1.17166	46.1908	39.4235	Quillaya saponaria
41972	SAMPLE ERWIN BOX2 148	4.725	0.0626579	62.6579	2.32283	2322.83	-30.2894	1.32609	49.1603	37.0715	Quillaya saponaria
41973	SAMPLE ERWIN BOX2 149	4.814	0.0565321	56.5321	2.34328	2343.28	-28.9916	1.17433	48.6764	41.4505	Quillaya saponaria
41974	SAMPLE ERWIN BOX2 150	4.408	0.060565	60.565	2.07365	2073.65	-27.7101	1.37398	47.0428	34.2384	Quillaya saponaria
41975	SAMPLE ERWIN BOX2 151	4.612	0.0758438	75.8438	2.04867	2048.67	-30.5489	1.64449	44.4204	27.0117	Peumus boldus
41976	SAMPLE ERWIN BOX2 152	4.534	0.0745605	74.5605	2.16317	2163.17	-27.4203	1.64447	47.7099	29.0122	Peumus boldus
41977	SAMPLE ERWIN BOX2 153	4.886	0.0868205	86.8205	2.3446	2344.6	-26.6063	1.77692	47.986	27.0051	Peumus boldus
41978	SAMPLE ERWIN BOX2 154	4.532	0.0529912	52.9912	2.19531	2195.31	-31.2996	1.16927	48.4401	41.4277	Quillaya saponaria
41979	SAMPLE ERWIN BOX2 155	4.804	0.0518242	51.8242	2.32219	2322.19	-31.3	1.07877	48.3387	44.809	Quillaya saponaria
41986	SAMPLE ERWIN BOX2 159	4.553	0.0286425	28.6425	1.99136	1991.36	-30.268	0.62909	43.7373	69.5248	Quillaya saponaria
41988	SAMPLE ERWIN BOX2 161	4.986	0.156205	156.205	2.32517	2325.17	-24.9959	3.13286	46.6339	14.8854	Ayesnia bedwellii
41989	SAMPLE ERWIN BOX2 162	4.659	0.0480473	48.0473	2.1165	2116.5	-29.5085	1.03128	45.4283	44.0504	Quillaya saponaria
41992	SAMPLE ERWIN BOX2 165	4.701	0.132423	132.423	2.15767	2157.67	-24.876	2.8169	45.8981	16.2938	Adesiyia bedwellii
TANTAUCO PARK (Chiloé)
ID IRMS	SAMPLE ID	peso (mg)	mg N2	ug N2	mg C	ug C	δ13C vs. VPDB normalizados	%N	%C	C/N	ID
45599	HOJAS EG A1 BOX 1	4.465	0.0939147	93.9147	2.31478	2314.78	-29.0508	2.10335	51.8427	24.6477	Drimys winteri
45600	HOJAS EG A2 BOX 1	5.324	0.0409573	40.9573	2.9677	2967.7	-33.2086	0.769295	55.742	72.4585	Drimys winteri
45601	HOJAS EG A3 BOX 1	4.725	0.0482064	48.2064	2.52591	2525.91	-32.476	1.02024	53.4584	52.3978	Drimys winteri
45602	HOJAS EG A4 BOX 1	4.731	0.0399775	39.9775	2.57527	2575.27	-27.2307	0.845011	54.434	64.4181	Tepualia stipularis
45603	HOJAS EG A5 BOX 1	5.326	0.0464972	46.4972	2.96974	2969.74	-31.4895	0.873023	55.7593	63.8692	Tepualia stipularis
45604	HOJAS EG A6 BOX 1	4.787	0.0499774	49.9774	2.60332	2603.32	-32.3388	1.04402	54.383	52.0899	Tepualia stipularis
45605	HOJAS EG A7 BOX 1	5.285	0.0531321	53.1321	2.78218	2782.18	-35.373	1.00534	52.6429	52.3634	Tepualia stipularis
45606	HOJAS EG A8 BOX 1	4.863	0.0536112	53.6112	2.47235	2472.35	-32.9528	1.10243	50.84	46.1163	Amomyrtus luma
45607	HOJAS EG A9 BOX 1	4.888	0.0481881	48.1881	2.49719	2497.19	-31.3072	0.985844	51.0882	51.8217	Amomyrtus luma
45608	HOJAS EG A10 BOX 1	5.136	0.0438917	43.8917	2.71808	2718.08	-29.9268	0.854588	52.9221	61.927	Podocarpus salignus
45609	HOJAS EG A11 BOX 1	5.018	0.0391963	39.1963	2.68103	2681.03	-30.8859	0.781114	53.4282	68.4	Podocarpus salignus
45610	HOJAS EG A12 BOX 1	4.923	0.0447563	44.7563	2.58971	2589.71	-31.135	0.909126	52.6043	57.8624	Podocarpus salignus
45613	HOJAS EG B1 BOX 1	4.699	0.0654388	65.4388	2.20942	2209.42	-32.0249	1.39261	47.019	33.7631	Caldcluvia paniculata
45614	HOJAS EG B2 BOX 1	4.65	0.0555541	55.5541	2.26412	2264.12	-33.2156	1.19471	48.6907	40.7552	Caldcluvia paniculata
45616	HOJAS EG B4 BOX 1	5.075	0.0491245	49.1245	2.67242	2672.42	-32.3735	0.96797	52.6586	54.4011	Desfontainia spinosa
45617	HOJAS EG B5 BOX 1	4.74	0.0270615	27.0615	2.04382	2043.82	-31.8669	0.570918	43.1185	75.5248	Weinmannia trichosperma
45619	HOJAS EG B7 BOX 1	5.523	0.0694893	69.4893	2.69358	2693.58	-32.66	1.25818	48.7703	38.7625	Lomatia ferruginea
45620	HOJAS EG B8 BOX 1	5.214	0.0505249	50.5249	2.55041	2550.41	-33.9965	0.969024	48.9147	50.4784	Lomatia ferruginea
45727	HOJAS EG A8 BOX 2	4.776	0.0349333	34.9333	2.47166	2471.66	-30.6549	0.731434	51.7516	70.7536	Philesia magellanica
45729	HOJAS EG A10 BOX 2	4.822	0.0319271	31.9271	2.70094	2700.94	-29.4004	0.662113	56.0129	84.5971	Drimys winteri
45738	HOJAS EG B4 BOX 2	4.878	0.0357478	35.7478	2.53483	2534.83	-30.0992	0.732838	51.9646	70.9087	Philesia magellanica
45742	HOJAS EG B8 BOX 2	4.794	0.0358897	35.8897	2.52944	2529.44	-33.1663	0.748638	52.7627	70.4783	Drimys winteri
45743	HOJAS EG B9 BOX 2	4.882	0.0255259	25.5259	2.58521	2585.21	-30.5646	0.522857	52.9539	101.278	Tepualia stipularis
45744	HOJAS EG B10 BOX 2	4.641	0.0582097	58.2097	2.22372	2223.72	-31.5262	1.25425	47.9146	38.2018	Cissus striata
45752	HOJAS EG C2 BOX 2	4.824	0.0361868	36.1868	2.17909	2179.09	-34.1714	0.750141	45.1719	60.2179	Weinmannia trichosperma
45753	HOJAS EG C3 BOX 2	4.542	0.0328251	32.8251	2.04033	2040.33	-31.809	0.722702	44.9215	62.1577	Weinmannia trichosperma
45754	HOJAS EG C4 BOX 2	4.684	0.034516	34.516	2.42083	2420.83	-29.1284	0.736891	51.683	70.1365	Desfontainia spinosa
45755	HOJAS EG C5 BOX 2	4.833	0.0302796	30.2796	2.35153	2351.53	-34.0724	0.626519	48.6557	77.6604	Tristerix tetrandrus
45756	HOJAS EG C6 BOX 2	4.926	0.0403547	40.3547	2.26318	2263.18	-30.7236	0.819218	45.9436	56.0823	Tristerix tetrandrus
45760	HOJAS EG C10 BOX 2	4.841	0.0273136	27.3136	2.67803	2678.03	-29.1287	0.564213	55.3198	98.0478	Tepualia stipularis
45762	HOJAS EG C12 BOX 2	4.981	0.0338166	33.8166	2.75151	2751.51	-28.2144	0.678912	55.2401	81.3656	Tepualia stipularis
45767	HOJAS EG D1 BOX 2	4.582	0.0250986	25.0986	2.27487	2274.87	-33.5763	0.547765	49.6481	90.6376	Drimys winteri
45768	HOJAS EG D2 BOX 2	4.516	0.0353689	35.3689	2.37214	2372.14	-31.0579	0.783191	52.5274	67.0684	Drimys winteri
45770	HOJAS EG D4 BOX 2	4.611	0.0337982	33.7982	2.01049	2010.49	-32.6986	0.732992	43.602	59.485	Tristerix tetrandrus
45771	HOJAS EG D5 BOX 2	4.636	0.0308672	30.8672	2.51856	2518.56	-31.3011	0.665815	54.3261	81.5933	Tepualia stipularis
45774	HOJAS EG D8 BOX 2	4.598	0.0285871	28.5871	2.43961	2439.61	-34.3507	0.621729	53.058	85.3393	Drimys winteri
45775	HOJAS EG D9 BOX 2	4.967	0.0353973	35.3973	2.50347	2503.47	-32.9936	0.712649	50.402	70.7248	Desfontainia spinosa
45778	HOJAS EG D12 BOX 2	4.997	0.0622307	62.2307	2.3455	2345.5	-30.1777	1.24536	46.9382	37.6904	Gaultheria mucronata
45779	HOJAS EG E1 BOX 2	4.965	0.0532122	53.2122	2.64482	2644.82	-29.6593	1.07175	53.2693	49.7033	Drimys winteri
45805	HOJAS EG F6 BOX 2	4.771	0.0859094	85.9094	2.301	2301	-33.8459	1.80066	48.2288	26.784	Drimys winteri
45806	HOJAS EG F7 BOX 2	4.752	0.0405199	40.5199	2.65644	2656.44	-30.9859	0.852692	55.9015	65.5588	Drimys winteri
45807	HOJAS EG F8 BOX 2	4.759	0.0353122	35.3122	2.52763	2527.63	-27.7324	0.742008	53.1127	71.5796	Podocarpus salignus
45808	HOJAS EG F9 BOX 2	4.877	0.0393098	39.3098	2.57451	2574.51	-32.223	0.806024	52.7887	65.4927	Nothofagus dombeyi
45809	HOJAS EG F10 BOX 2	4.757	0.0440569	44.0569	2.57966	2579.66	-28.9012	0.926149	54.2287	58.5529	Pilgerodendron uviferum
45810	HOJAS EG F11 BOX 2	4.778	0.0349416	34.9416	2.41086	2410.86	-30.0296	0.731302	50.4575	68.9968	Podocarpus salignus

## Sheet: Oxygen deer Pudu puda
Lab Code	δ18OCO3 (‰ VPDB)	δ18OCO3 (‰ VSMOW)	δ18OPO4 (‰ VSMOW)	δ18Ometeoric water (‰ VSMOW)	δ13C (‰, V-PDB)	δ13C (‰, V-PDB) (Corrected value)	Values of estimated consumed plants (ECP) (+12‰)
UB43	-5.36	25.3	16.2	-8.1	-17.5	-16	-28
UB1PREPUDU	-4.22	26.5	17.4	-7.1	-19.8	-18.3	-30.3
UB4ANN1	0.33	30.5	21.3	-3.6	-17	-15.5	-27.5
UB51	-5.44	25.3	16.2	-8.2	-18.7	-17.2	-29.2
UB8A	-2.63	28.1	19	-5.7	-18.1	-16.6	-28.6
UB50	-4.08	26.7	17.6	-7	-18.6	-17.1	-29.1
UB6A-16-097	-3.66	27.1	18	-6.6	-16.7	-15.2	-27.2
UBNN25A	-3.8	26.9	17.8	-6.8	-16.7	-15.2	-25.2
